# Supplementary material for: Systematic Investigation of mRNA N6-Methyladenosine Machinery in Primary Prostate Cancer
Source: Dis Markers. 2020 Nov 12;2020:8833438. doi: 10.1155/2020/8833438 (PMC7676945; doi:10.1155/2020/8833438)
Supplement: Supplementary Materials — include a word file, six figures, and nine spreadsheets. The supplementary materials.docx includes four tables and provides a description for each supplementary material file. [file 8833438.f1.zip]

Archive with 14 entries (14 files):
- 8833438.f1/Excel S1.xlsx
- 8833438.f1/Excel S2.xlsx
- 8833438.f1/Excel S3.xlsx
- 8833438.f1/Excel S4.xlsx
- 8833438.f1/Excel S5.xlsx
- 8833438.f1/Excel S6.xlsx
- 8833438.f1/Excel S7.xlsx
- 8833438.f1/Excel S8.xlsx
- 8833438.f1/Excel S9.xlsx
- 8833438.f1/Fig S3 (1).pdf
- 8833438.f1/Fig S4 (1).pdf
- 8833438.f1/Fig S5 (1).pdf
- 8833438.f1/Fig S6 (1).pdf
- 8833438.f1/supplementary materials.docx
