# Supplementary material for: Systematic Investigation of mRNA N6-Methyladenosine Machinery in Primary Prostate Cancer
Source: Dis Markers. 2020 Nov 12;2020:8833438. doi: 10.1155/2020/8833438 (PMC7676945; doi:10.1155/2020/8833438)
Supplement: Supplementary Materials — include a word file, six figures, and nine spreadsheets. The supplementary materials.docx includes four tables and provides a description for each supplementary material file. [file 8833438.f1.zip › 8833438.f1/Excel S1.xlsx]

## Sheet: Sheet1
Excel S1 Genomic Methylation Changes of the mRNA m6A Regulators in Prostate Cancer
m6A Regulator	CpG Methylation Fold Change in Prostate Cancer	p-Value of CpG Methylation Change in Prostate Cancer	Genomic CpG Methylation Beta-Values in Primary Prostate Tumors
			TCGA-HC-A6HY-01A-11D-A31M-05	TCGA-HC-8260-01A-11D-2261-05	TCGA-V1-A8ML-01A-11D-A378-05	TCGA-VN-A88Q-01A-11D-A34V-05	TCGA-HC-7744-01A-11D-2116-05	TCGA-ZG-A9L2-01A-31D-A41L-05	TCGA-HC-A6AS-01A-11D-A30F-05	TCGA-2A-A8W3-01A-11D-A378-05	TCGA-M7-A722-01A-12D-A365-05	TCGA-X4-A8KQ-01A-12D-A365-05	TCGA-HI-7170-01A-11D-2116-05	TCGA-CH-5768-01A-11D-1578-05	TCGA-XJ-A83H-01A-11D-A34V-05	TCGA-YL-A9WJ-01A-11D-A378-05	TCGA-EJ-5505-01A-01D-1578-05	TCGA-J4-A6M7-01A-11D-A31M-05	TCGA-QU-A6IN-01A-11D-A31M-05	TCGA-G9-7519-01A-11D-2261-05	TCGA-J4-8200-01A-11D-A29T-05	TCGA-EJ-7325-01B-11D-A32C-05	TCGA-VP-A87H-01A-11D-A34V-05	TCGA-KK-A6DY-01A-12D-A30Z-05	TCGA-G9-6498-01A-12D-A30Z-05	TCGA-V1-A9ZG-01A-11D-A41L-05	TCGA-V1-A9OQ-01A-11D-A41L-05	TCGA-2A-A8VV-01A-11D-A378-05	TCGA-CH-5746-01A-11D-1578-05	TCGA-EJ-7123-01A-11D-1963-05	TCGA-MG-AAMC-01A-11D-A41L-05	TCGA-V1-A8MF-01A-11D-A365-05	TCGA-KK-A7AZ-01A-12D-A32C-05	TCGA-XK-AAJA-01A-11D-A41L-05	TCGA-EJ-5510-01A-01D-1578-05	TCGA-J4-A67O-01A-11D-A30F-05	TCGA-KK-A6E0-01A-11D-A30Z-05	TCGA-G9-6342-01A-11D-1963-05	TCGA-EJ-8474-01A-11D-2399-05	TCGA-CH-5764-01A-21D-1578-05	TCGA-XK-AAJR-01A-11D-A41L-05	TCGA-YL-A8S9-01A-11D-A378-05	TCGA-ZG-A9L0-01A-11D-A41L-05	TCGA-2A-A8W1-01A-11D-A378-05	TCGA-EJ-7788-01A-11D-2116-05	TCGA-V1-A9OX-01A-11D-A41L-05	TCGA-XK-AAIV-01A-11D-A41L-05	TCGA-V1-A8MM-01A-11D-A378-05	TCGA-ZG-A9LN-01A-11D-A41L-05
METTL3	0.87	2.06376e-12	0.0660311	0.0500406	0.069931	0.0613695	0.0483096	0.0450434	0.0692457	0.044198	0.0511471	0.0436508	0.0737928	0.0499094	0.0635166	0.0810657	0.0833687	0.0660243	0.0681197	0.072054	0.0680414	0.0605021	0.0494901	0.0711692	0.0956157	0.0658979	0.085159	0.0812667	0.0737274	0.075225	0.0747728	0.0705824	0.079196	0.0645549	0.0631055	0.0655634	0.0740899	0.0736773	0.0684813	0.0503324	0.0690172	0.0772664	0.0631544	0.0707565	0.0642292	0.0617831	0.0815529	0.0776961	0.0735171
METTL14	0.958	4.5534e-11	0.20359	0.200043	0.176898	0.17863	0.147208	0.190585	0.172338	0.169223	0.179307	0.182362	0.177816	0.188606	0.180982	0.190253	0.187469	0.136182	0.192521	0.171877	0.185172	0.183296	0.18559	0.164338	0.173988	0.166096	0.179065	0.193509	0.187332	0.177384	0.197403	0.187469	0.193276	0.150198	0.169182	0.18026	0.160702	0.195417	0.176202	0.144233	0.194703	0.188665	0.181838	0.183307	0.171961	0.197841	0.186851	0.195093	0.188981
CBLL1	0.846	1.46622e-34	0.161519	0.13715	0.143599	0.142271	0.12722	0.131092	0.162952	0.129962	0.109941	0.128127	0.149006	0.136606	0.157279	0.148132	0.160999	0.140489	0.176654	0.157682	0.16147	0.162861	0.129091	0.125111	0.169844	0.141813	0.143143	0.158745	0.148007	0.159308	0.173445	0.154427	0.14775	0.15578	0.109016	0.148339	0.153733	0.168334	0.175937	0.0971901	0.178812	0.144873	0.147285	0.160724	0.168213	0.154544	0.159066	0.164492	0.160363
RBM15	0.932	0.0100423	0.0542604	0.0476625	0.0465073	0.0648581	0.0637435	0.0504817	0.0614151	0.0485645	0.0564521	0.0540599	0.0558827	0.0387538	0.0632249	0.0681783	0.0479912	0.0557279	0.0496574	0.0531778	0.0500088	0.0588026	0.0480214	0.0517745	0.0683275	0.0676137	0.0700653	0.0598841	0.0562262	0.0599678	0.0665414	0.0631164	0.0694129	0.0509654	0.0587825	0.0623779	0.0550031	0.0578277	0.0654373	0.0449688	0.0563631	0.0623942	0.0528572	0.0507475	0.0488972	0.065979	0.0658043	0.0658347	0.0683578
RBM15B	0.885	7.54613e-17	0.3925	0.354375	0.24598	0.363904	0.374806	0.300703	0.336948	0.324746	0.309285	0.291886	0.301948	0.338775	0.381538	0.380042	0.403122	0.279667	0.421134	0.347436	0.346147	0.374184	0.361226	0.33423	0.40047	0.369874	0.392764	0.355097	0.388616	0.304162	0.388947	0.387361	0.308814	0.265694	0.345634	0.355617	0.338387	0.353874	0.358047	0.325516	0.382402	0.341613	0.26718	0.375616	0.252491	0.397783	0.408894	0.346988	0.387181
VIRMA	1.016	0.302844	0.107094	0.115545	0.0955471	0.103831	0.110507	0.106888	0.1027	0.107205	0.124454	0.103099	0.107063	0.104466	0.100838	0.100695	0.0992457	0.0870249	0.0823922	0.109441	0.101638	0.0942189	0.0976824	0.10846	0.119795	0.0945239	0.107385	0.110246	0.10724	0.101604	0.100205	0.0961221	0.108573	0.101506	0.117096	0.0934594	0.103067	0.102909	0.107586	0.0916011	0.0914244	0.100662	0.116961	0.103085	0.0885914	0.116979	0.108474	0.108132	0.103869
WTAP	0.874	2.60636e-23	0.151519	0.125862	0.15605	0.128261	0.121303	0.123102	0.152132	0.107547	0.0996653	0.110994	0.13734	0.123536	0.147697	0.152191	0.1442	0.136092	0.16402	0.157611	0.148241	0.152338	0.128473	0.128741	0.154689	0.169674	0.145758	0.145038	0.143584	0.159125	0.166864	0.141481	0.150358	0.144472	0.126586	0.151163	0.142527	0.167461	0.155732	0.116888	0.16799	0.141282	0.13959	0.151336	0.134559	0.158419	0.160245	0.154904	0.157188
ZC3H13	0.965	4.50239e-38	0.431298	0.433658	0.422593	0.427704	0.437356	0.435425	0.432268	0.407378	0.398228	0.410088	0.39587	0.430304	0.435617	0.436547	0.434792	0.426202	0.437731	0.433875	0.438082	0.438857	0.427192	0.436636	0.440499	0.428594	0.42965	0.432067	0.423878	0.431903	0.439732	0.431974	0.430081	0.432252	0.439381	0.430763	0.434545	0.431337	0.426655	0.420312	0.436565	0.436656	0.434661	0.431313	0.426716	0.43694	0.430416	0.435293	0.434378
METTL16	1.079	1.44586e-13	0.487573	0.491211	0.480848	0.489277	0.497706	0.477506	0.444179	0.469014	0.462632	0.48492	0.430694	0.475126	0.467358	0.474145	0.499909	0.47553	0.432361	0.479481	0.471573	0.46447	0.468752	0.484882	0.508662	0.479914	0.491304	0.473746	0.470334	0.45351	0.410844	0.493629	0.514214	0.468355	0.474713	0.503549	0.452368	0.467822	0.494184	0.395797	0.457263	0.515492	0.483991	0.449139	0.46484	0.497181	0.436738	0.480098	0.4731
TRA2A	0.983	2.08481e-05	0.171431	0.156256	0.159413	0.176404	0.170414	0.166131	0.174107	0.157746	0.145504	0.147184	0.166158	0.157948	0.166265	0.170925	0.17225	0.171731	0.162454	0.174235	0.167893	0.170362	0.164442	0.164822	0.168239	0.175079	0.170401	0.158486	0.168416	0.166607	0.174867	0.16702	0.177095	0.160769	0.167921	0.170582	0.162663	0.170905	0.176408	0.166366	0.171332	0.169948	0.172958	0.172245	0.169276	0.177706	0.164981	0.175265	0.177827
CAPRIN1	0.977	3.26151e-05	0.255954	0.257657	0.242	0.253227	0.266038	0.24474	0.245644	0.243652	0.247525	0.246406	0.238293	0.235417	0.253798	0.236894	0.251855	0.220297	0.256286	0.245309	0.253013	0.254513	0.248655	0.249532	0.266138	0.251411	0.250528	0.240954	0.250853	0.250443	0.254043	0.252866	0.249876	0.237227	0.256985	0.254244	0.237778	0.258048	0.255519	0.228812	0.245221	0.26276	0.243089	0.254123	0.229967	0.257979	0.247181	0.256109	0.2538
ALKBH5	1.07	9.16552e-09	0.220451	0.231405	0.166336	0.236784	0.256702	0.229628	0.212474	0.228316	0.22109	0.217875	0.178372	0.233592	0.20891	0.181627	0.222262	0.212867	0.176258	0.180466	0.164454	0.209958	0.205474	0.19689	0.192671	0.219247	0.247263	0.208205	0.232248	0.183046	0.199992	0.216363	0.239724	0.177325	0.217326	0.21824	0.177835	0.217434	0.274519	0.160363	0.185149	0.213116	0.213751	0.209226	0.17702	0.270542	0.202618	0.208858	0.211121
FTO	1.027	5.31461e-13	0.529501	0.553357	0.536543	0.547328	0.556066	0.555423	0.54094	0.53771	0.515326	0.515926	0.495365	0.550208	0.536258	0.549818	0.527872	0.530414	0.493558	0.53677	0.544909	0.530923	0.534046	0.532521	0.560561	0.554923	0.540727	0.530917	0.524271	0.513027	0.519028	0.533933	0.555697	0.5323	0.556752	0.543453	0.508804	0.534188	0.566985	0.516001	0.518285	0.540271	0.548922	0.539119	0.511273	0.563221	0.530692	0.5315	0.537625
EIF3A	0.973	9.32181e-15	0.442629	0.445657	0.429161	0.445089	0.440731	0.428811	0.433419	0.43406	0.402804	0.411461	0.407217	0.431907	0.441615	0.43676	0.442798	0.428857	0.437737	0.441136	0.446473	0.443025	0.437231	0.438352	0.448287	0.435138	0.441512	0.439903	0.426841	0.440943	0.438919	0.446622	0.448527	0.411646	0.439359	0.441266	0.435173	0.443347	0.44327	0.408861	0.441782	0.440496	0.433907	0.443146	0.430947	0.439606	0.439609	0.450557	0.447579
EIF3B	0.964	7.04407e-16	0.534445	0.526314	0.501768	0.522465	0.525539	0.487954	0.509423	0.502557	0.503494	0.500935	0.536253	0.515142	0.533606	0.531784	0.534429	0.509523	0.538923	0.527816	0.529185	0.527121	0.519557	0.518739	0.556337	0.522499	0.53535	0.520704	0.535333	0.514196	0.534338	0.54066	0.512647	0.491306	0.521919	0.539308	0.511829	0.536656	0.507411	0.405937	0.529928	0.533911	0.506325	0.527299	0.452909	0.522812	0.498085	0.533933	0.528095
EIF3D	0.967	2.67815e-07	0.161307	0.167311	0.158589	0.163097	0.158039	0.151354	0.162682	0.147939	0.132874	0.146232	0.147661	0.144995	0.157608	0.162259	0.165183	0.154396	0.153824	0.159759	0.162145	0.157736	0.16515	0.161741	0.184896	0.15608	0.158841	0.179071	0.15556	0.16597	0.168511	0.156965	0.163444	0.150103	0.155034	0.151432	0.161639	0.16516	0.160923	0.130269	0.163357	0.163299	0.157141	0.162776	0.138147	0.166487	0.163983	0.168904	0.164535
EIF3E	0.879	7.39075e-16	0.178108	0.152215	0.144031	0.172078	0.0680198	0.0815314	0.14277	0.164452	0.160402	0.165328	0.131496	0.0654044	0.164596	0.127547	0.151231	0.119336	0.164185	0.142055	0.157805	0.160093	0.137266	0.405347	0.148409	0.15837	0.14489	0.106339	0.13056	0.173278	0.1578	0.161669	0.13983	0.129398	0.0716743	0.117712	0.135723	0.163194	0.168505	0.132852	0.169827	0.162654	0.155978	0.14713	0.164805	0.134801	0.14823	0.173006	0.169111
EIF3F	0.869	5.4747e-18	0.163787	0.178611	0.130454	0.138089	0.150342	0.121707	0.157232	0.154438	0.178482	0.129569	0.151605	0.120218	0.176576	0.146154	0.172635	0.118741	0.181935	0.163751	0.142102	0.170591	0.152105	0.148001	0.171052	0.152653	0.141558	0.148065	0.133524	0.166172	0.16902	0.146974	0.149263	0.142276	0.149131	0.137783	0.13779	0.170804	0.153977	0.0969903	0.16513	0.142804	0.159362	0.162574	0.141635	0.147225	0.15031	0.156211	0.176493
EIF3G	1.082	4.55996e-09	0.404945	0.445426	0.417621	0.434971	0.451898	0.407804	0.387572	0.395911	0.393233	0.396695	0.365406	0.424277	0.404931	0.459738	0.428203	0.421935	0.368113	0.405643	0.417096	0.388235	0.418693	0.414306	0.45064	0.440368	0.448702	0.379146	0.428494	0.381049	0.35535	0.430233	0.428643	0.352373	0.453514	0.427369	0.391153	0.395203	0.443411	0.36136	0.362495	0.433656	0.407843	0.400247	0.371466	0.448037	0.391792	0.414673	0.413448
EIF3H	0.922	7.34197e-25	0.307629	0.289702	0.279419	0.282895	0.298974	0.275649	0.304761	0.278984	0.26757	0.232203	0.240289	0.302117	0.301465	0.28955	0.298993	0.292512	0.32016	0.295841	0.302933	0.310527	0.299633	0.287596	0.305757	0.312685	0.289441	0.279895	0.261077	0.295205	0.307174	0.293192	0.288413	0.290283	0.305503	0.296386	0.282085	0.311006	0.310317	0.295742	0.31748	0.286175	0.280825	0.302724	0.293551	0.307823	0.305217	0.310133	0.311125
EIF3I	1.07	0.00240819	0.118775	0.123569	0.109275	0.129003	0.128801	0.124952	0.109909	0.122743	0.123858	0.136873	0.123197	0.108019	0.118447	0.130007	0.125883	0.125243	0.108353	0.117613	0.118347	0.111454	0.107284	0.127083	0.135028	0.126268	0.129574	0.122199	0.131938	0.118865	0.115746	0.121927	0.124926	0.109336	0.140948	0.12371	0.127162	0.119977	0.138404	0.122492	0.107277	0.132285	0.126687	0.1054	0.105366	0.134098	0.121261	0.123362	0.122832
EIF3J	0.854	7.73001e-17	0.163487	0.148227	0.151586	0.159714	0.174857	0.135344	0.182997	0.160086	0.138308	0.149961	0.187259	0.199797	0.184183	0.162836	0.162372	0.156486	0.217795	0.18172	0.17781	0.172639	0.157425	0.15424	0.21167	0.186162	0.141554	0.163671	0.170908	0.188873	0.207537	0.17757	0.166758	0.168385	0.151436	0.146911	0.165279	0.197952	0.170312	0.118199	0.185711	0.147339	0.167996	0.188692	0.160471	0.181508	0.207064	0.180243	0.191347
EIF3K	1.464	1.31998e-14	0.0805969	0.125012	0.158985	0.220355	0.16653	0.149691	0.166449	0.155168	0.20049	0.0561933	0.0593068	0.14795	0.0766018	0.183254	0.192578	0.0585588	0.0521984	0.152954	0.178273	0.139886	0.142191	0.136	0.17074	0.188349	0.124731	0.089831	0.199586	0.150167	0.071065	0.199739	0.232922	0.113964	0.121199	0.159117	0.142341	0.100203	0.238168	0.131406	0.0939581	0.097898	0.164819	0.131164	0.191561	0.155713	0.173223	0.18797	0.156704
EIF3L	0.948	8.11997e-06	0.24388	0.232523	0.20977	0.267803	0.164539	0.193884	0.260108	0.270541	0.243949	0.17804	0.213259	0.258428	0.263828	0.268343	0.269859	0.273713	0.259305	0.265088	0.258319	0.228896	0.267739	0.221287	0.287621	0.217451	0.259267	0.205924	0.275991	0.263473	0.247976	0.250016	0.203358	0.197149	0.25533	0.24983	0.227913	0.26821	0.220815	0.182953	0.259271	0.25497	0.241022	0.226236	0.200744	0.30109	0.287174	0.259603	0.238865
EIF3M	0.961	3.32952e-07	0.267951	0.248967	0.23219	0.263509	0.244328	0.268832	0.254983	0.253211	0.246571	0.236587	0.247136	0.24122	0.256804	0.24815	0.269049	0.23909	0.264019	0.271237	0.254619	0.246673	0.247698	0.231001	0.28756	0.256608	0.280523	0.263082	0.26761	0.24796	0.266661	0.272428	0.279442	0.255272	0.231902	0.275886	0.255127	0.273122	0.281554	0.240058	0.259352	0.274654	0.244039	0.268971	0.236704	0.270743	0.251637	0.268633	0.271906
FMR1	1.138	1.89606e-13	0.130644	0.12915	0.135779	0.135228	0.174183	0.130722	0.166477	0.130923	0.134475	0.126677	0.131641	0.141215	0.12356	0.104757	0.151483	0.108155	0.104702	0.123571	0.15382	0.1149	0.137539	0.143249	0.150961	0.165863	0.157723	0.14498	0.165164	0.139512	0.129862	0.174574	0.138143	0.113761	0.153221	0.121606	0.123008	0.13291	0.165272	0.118899	0.11309	0.121852	0.162422	0.145197	0.157612	0.167696	0.123801	0.129042	0.137548
HNRNPA2B1	0.886	2.11086e-17	0.117064	0.114639	0.108152	0.11831	0.111483	0.0904787	0.114573	0.104823	0.12034	0.125658	0.100564	0.0974633	0.110772	0.098119	0.102604	0.0945393	0.12237	0.112424	0.111796	0.11087	0.102464	0.101681	0.1184	0.10045	0.102974	0.119536	0.124527	0.111651	0.129319	0.11444	0.100124	0.0993344	0.103872	0.0925803	0.103984	0.120984	0.116545	0.0828824	0.125497	0.104843	0.107214	0.124286	0.0989694	0.132823	0.0980723	0.12282	0.115011
HNRNPC	0.965	8.44806e-05	0.317689	0.324482	0.307616	0.29659	0.300944	0.260007	0.307591	0.301515	0.321346	0.293553	0.291363	0.283184	0.299197	0.292711	0.296355	0.258811	0.302857	0.29537	0.308937	0.311194	0.304528	0.271698	0.343266	0.27926	0.309203	0.3233	0.264015	0.289257	0.320796	0.308749	0.295548	0.279713	0.262844	0.298533	0.266427	0.316588	0.324415	0.282051	0.304763	0.298108	0.314597	0.31134	0.257167	0.298315	0.287229	0.312407	0.302735
IGF2BP2	1.036	1.71879e-05	0.471454	0.492313	0.469967	0.477034	0.487751	0.501185	0.467575	0.479301	0.428678	0.43416	0.410596	0.47037	0.480639	0.485493	0.478233	0.431381	0.433073	0.460199	0.49772	0.47997	0.486158	0.486091	0.479572	0.471846	0.489583	0.40555	0.44784	0.460288	0.468733	0.454364	0.491912	0.434311	0.494282	0.480683	0.448864	0.471185	0.499966	0.415481	0.458135	0.46446	0.468617	0.475573	0.455213	0.510462	0.467142	0.489058	0.484861
LRPPRC	0.886	4.56127e-32	0.264098	0.248303	0.242938	0.250272	0.235431	0.232005	0.263733	0.216904	0.198506	0.215736	0.221603	0.228743	0.251036	0.240507	0.258524	0.200527	0.267149	0.251852	0.278748	0.264625	0.262662	0.268696	0.271415	0.245491	0.265442	0.255872	0.243925	0.265546	0.273972	0.246899	0.266016	0.253404	0.258304	0.2747	0.256235	0.271058	0.231064	0.223702	0.266658	0.254601	0.239944	0.249311	0.236394	0.237778	0.257761	0.264766	0.261261
PRRC2A	0.943	3.77377e-17	0.578688	0.582747	0.55832	0.547786	0.576869	0.497009	0.564546	0.540081	0.55864	0.534002	0.603127	0.53866	0.582488	0.576439	0.578269	0.55229	0.605202	0.572007	0.589633	0.575605	0.552914	0.552651	0.650321	0.553311	0.599659	0.601809	0.5909	0.568713	0.591299	0.608055	0.535233	0.536704	0.534914	0.574787	0.581611	0.602161	0.562194	0.444019	0.592777	0.572762	0.555825	0.582516	0.446177	0.601014	0.561288	0.578647	0.592569
PRRC2C	0.979	2.23679e-08	0.384563	0.357933	0.379211	0.376861	0.398973	0.3586	0.38583	0.373992	0.364095	0.349388	0.367487	0.399395	0.385788	0.365765	0.385535	0.368959	0.399296	0.378832	0.373015	0.383672	0.393765	0.357552	0.394624	0.390555	0.374445	0.369908	0.381072	0.378174	0.388509	0.382789	0.38626	0.373639	0.387355	0.37322	0.370011	0.378979	0.398233	0.349529	0.389129	0.375517	0.370854	0.400286	0.398977	0.402546	0.388963	0.380221	0.391793
RBMX	1.033	0.0126158	0.203351	0.20869	0.198232	0.210449	0.209134	0.214734	0.194773	0.219218	0.221117	0.232561	0.206367	0.204873	0.199619	0.20745	0.198043	0.190126	0.198243	0.203329	0.20837	0.1974	0.214404	0.207215	0.201043	0.206516	0.204029	0.187847	0.214256	0.199954	0.191506	0.201996	0.219174	0.184803	0.16448	0.225528	0.205527	0.203208	0.216678	0.181483	0.185629	0.216423	0.20764	0.20488	0.207522	0.203287	0.215583	0.241268	0.206427
YTHDC1	0.85	4.27207e-21	0.202501	0.249402	0.166387	0.172925	0.184046	0.155336	0.220172	0.163731	0.156684	0.177364	0.198262	0.249248	0.199573	0.191609	0.180887	0.165841	0.226722	0.184379	0.195602	0.199303	0.235461	0.172202	0.210677	0.176544	0.171981	0.191625	0.161858	0.209291	0.230159	0.205044	0.173615	0.191089	0.240982	0.17215	0.180727	0.214692	0.175766	0.172074	0.228518	0.169162	0.181544	0.204733	0.184243	0.183403	0.209081	0.206541	0.207186
YTHDC2	0.917	1.28972e-26	0.164438	0.170053	0.156329	0.16123	0.16331	0.163219	0.164494	0.159293	0.126341	0.133164	0.136386	0.166311	0.16688	0.167456	0.168393	0.16945	0.164504	0.169457	0.168342	0.167781	0.162897	0.175182	0.163163	0.164108	0.167327	0.169056	0.155623	0.172376	0.180078	0.163445	0.166497	0.166938	0.179907	0.163533	0.162613	0.173388	0.162831	0.159605	0.173526	0.16656	0.169928	0.165067	0.173743	0.173475	0.177325	0.179901	0.171628
YTHDF1	0.984	0.0119587	0.189322	0.18781	0.184077	0.182497	0.191349	0.169414	0.19532	0.17622	0.161077	0.169419	0.161546	0.190945	0.176219	0.190045	0.189974	0.167413	0.17861	0.178768	0.198418	0.185304	0.18232	0.176907	0.18371	0.178715	0.184907	0.191485	0.202301	0.199179	0.193369	0.187544	0.20147	0.172798	0.18961	0.189215	0.171326	0.193114	0.196405	0.169435	0.19139	0.17095	0.179457	0.182968	0.18061	0.191101	0.183854	0.192594	0.192004
YTHDF2	1.147	8.33627e-10	0.253171	0.288358	0.252757	0.303316	0.302363	0.238259	0.294971	0.250682	0.223832	0.229826	0.211644	0.287971	0.251255	0.34637	0.262394	0.241224	0.199084	0.254078	0.250788	0.262967	0.259496	0.25862	0.264316	0.243038	0.39807	0.261605	0.259579	0.235523	0.223856	0.262206	0.354144	0.224028	0.287425	0.27714	0.273387	0.253703	0.308527	0.239155	0.227646	0.267769	0.267519	0.282859	0.286141	0.300767	0.247699	0.32848	0.302002
YTHDF3	0.956	3.59528e-09	0.113211	0.112093	0.105401	0.113224	0.120664	0.116306	0.104531	0.109583	0.0944142	0.106942	0.0871603	0.115149	0.107209	0.114398	0.110688	0.113778	0.111712	0.108033	0.112848	0.109545	0.113369	0.118115	0.110005	0.109433	0.10984	0.114487	0.0870077	0.117462	0.118014	0.10413	0.115565	0.0981799	0.117689	0.115252	0.10855	0.115893	0.113335	0.109403	0.116248	0.111104	0.115923	0.112821	0.106948	0.113839	0.112938	0.117991	0.106328
[truncated: 505 more columns]
