# Supplementary material for: Systematic Investigation of mRNA N6-Methyladenosine Machinery in Primary Prostate Cancer
Source: Dis Markers. 2020 Nov 12;2020:8833438. doi: 10.1155/2020/8833438 (PMC7676945; doi:10.1155/2020/8833438)
Supplement: Supplementary Materials — include a word file, six figures, and nine spreadsheets. The supplementary materials.docx includes four tables and provides a description for each supplementary material file. [file 8833438.f1.zip › 8833438.f1/Excel S2.xlsx]

## Sheet: Sheet1
Excel S2 Differential Expression of the mRNA m6A Regulator Genes in Prostate Cancer
m6A Regulator	Expression Fold Change in Prostate Cancer	p-Value of Expression Change in Prostate Cancer	FPKM Values in Primary Prostate Tumors
			TCGA-KK-A8IH-01A-11R-A36G-07	TCGA-HI-7171-01A-12R-2118-07	TCGA-G9-6333-01A-12R-1965-07	TCGA-KK-A7AP-01A-12R-A33R-07	TCGA-EJ-7312-01B-21R-A32O-07	TCGA-XJ-A83F-01A-11R-A352-07	TCGA-CH-5761-01A-11R-1580-07	TCGA-HC-8265-01A-11R-2263-07	TCGA-HC-7077-01A-11R-1965-07	TCGA-KC-A7F6-01A-11R-A33R-07	TCGA-KK-A8IM-01A-11R-A36G-07	TCGA-XJ-A9DI-01A-11R-A37L-07	TCGA-YL-A8HJ-01A-11R-A36G-07	TCGA-QU-A6IM-01A-11R-A31N-07	TCGA-HC-8213-01A-11R-A29R-07	TCGA-CH-5743-01A-21R-1580-07	TCGA-HC-7736-01A-11R-2118-07	TCGA-XK-AAJA-01A-11R-A41O-07	TCGA-J4-A67M-01A-11R-A30B-07	TCGA-HC-8258-01A-11R-2263-07	TCGA-HC-7819-01A-11R-2118-07	TCGA-EJ-A6RC-01A-11R-A32O-07	TCGA-J4-A6G1-01A-11R-A311-07	TCGA-EJ-A7NJ-01A-22R-A352-07	TCGA-EJ-5503-01A-01R-1580-07	TCGA-EJ-A8FS-01A-11R-A352-07	TCGA-EJ-7125-01A-11R-1965-07	TCGA-G9-6385-01A-11R-1789-07	TCGA-HC-A632-01A-11R-A29R-07	TCGA-V1-A9OH-01A-11R-A41O-07	TCGA-HC-A8D1-01A-11R-A36G-07	TCGA-HC-8262-01A-11R-2263-07	TCGA-KC-A7F3-01A-21R-A33R-07	TCGA-KK-A7AQ-01A-11R-A33R-07	TCGA-G9-6351-01A-21R-1965-07	TCGA-YL-A8SI-01A-11R-A41O-07	TCGA-CH-5740-01A-11R-1580-07	TCGA-YL-A8S8-01A-11R-A37L-07	TCGA-EJ-A8FU-01A-11R-A36G-07	TCGA-VP-A876-01A-11R-A352-07	TCGA-XJ-A83H-01A-11R-A352-07	TCGA-XK-AAIV-01A-11R-A41O-07	TCGA-EJ-7797-01A-11R-2263-07	TCGA-M7-A721-01A-12R-A32O-07	TCGA-KK-A8I7-01A-21R-A36G-07	TCGA-ZG-A8QX-01A-11R-A37L-07	TCGA-J4-A83I-01A-11R-A36G-07
METTL3	1.45633	1.21549e-16	13.1071	8.5023	9.45942	14.7181	11.8566	10.2549	9.96535	8.95523	8.30999	11.0635	10.5897	8.91911	7.31818	4.96747	12.0114	5.79492	6.886	14.2287	5.85284	10.2408	9.9966	7.83948	7.25881	8.05487	6.29692	13.7522	6.98261	6.19069	8.41448	6.37747	7.8212	10.7066	10.9139	7.75685	6.8065	8.06958	8.77014	12.3473	8.22964	12.4104	9.70284	6.05221	8.46626	9.09032	7.3027	11.0689	12.7942
METTL14	0.911094	0.00973656	3.26027	4.21019	4.07535	2.97115	2.212	3.62483	4.58166	3.07802	4.14432	3.23019	4.09975	3.90724	3.74369	2.22896	5.04652	5.53984	4.25053	3.16733	2.84414	3.38104	5.25539	3.65389	3.69976	4.04327	3.90685	4.62281	4.4672	4.00683	4.73842	3.97335	3.84805	4.04166	3.83653	2.17569	4.36915	3.8072	4.80018	4.18526	3.68336	4.4713	3.81025	3.63282	3.66565	2.99759	3.27933	4.04316	3.88467
CBLL1	0.956908	0.601495	4.18476	7.63556	7.92172	5.00483	7.11165	7.50021	12.0207	11.1044	7.99279	6.52126	6.03577	5.07684	7.17658	5.22501	7.88355	7.42124	16.3603	6.3656	3.66743	8.43882	7.78754	8.96545	5.54374	12.1829	10.5357	11.6086	19.2131	12.1646	4.64554	6.80973	5.66109	7.39309	8.33722	6.22474	9.82166	32.8048	6.76333	30.4675	6.91295	8.06285	8.94497	4.99416	8.07281	15.7004	5.5631	6.86254	3.46979
RBM15	1.17331	3.62522e-05	1.93466	2.87695	2.38473	1.9735	1.56663	2.27849	2.33588	2.00504	2.82487	1.85652	2.0457	2.20205	1.73469	3.08333	1.81542	3.43209	2.75911	2.2262	1.88233	2.24744	3.01877	2.01609	1.92376	1.79695	2.39	2.74235	2.56519	1.97402	1.87694	1.97131	1.97518	2.55337	2.75329	2.55229	1.6389	1.92484	2.16487	2.74207	2.06158	3.07522	3.55339	2.42448	2.21171	2.10241	1.65703	2.7772	2.79827
RBM15B	1.33723	1.55253e-13	13.7423	21.9125	14.4186	18.1557	16.3741	20.9118	26.5408	12.3999	19.358	18.0278	15.1034	13.4517	12.7813	8.87525	12.905	14.3049	14.7823	12.4037	10.8292	13.0957	18.1028	12.6774	12.3303	12.4036	15.6122	15.1179	16.2752	14.0052	14.3965	18.8848	13.3809	16.9983	14.8261	17.3988	13.933	11.5755	15.0517	13.7107	12.4696	13.3012	20.3543	14.8259	18.1164	15.9884	13.9973	13.2659	14.397
VIRMA	0.975753	0.624171	3.90447	7.07608	3.72026	7.63196	5.82008	3.89553	8.53798	5.20406	6.5908	4.07782	5.09028	4.66504	4.49262	3.92141	5.74523	5.9838	6.43507	3.17854	3.92339	4.98971	5.76897	4.9106	4.69816	4.34431	5.13491	4.98665	6.13473	5.03802	7.56676	6.05939	4.67604	5.29762	4.1326	3.0335	4.56234	4.64394	5.96987	6.44382	4.90653	6.42486	4.57144	10.1117	5.35278	4.46698	4.69668	4.38291	5.32481
WTAP	1.10785	0.0159623	16.354	17.0154	16.7127	17.7568	19.7118	21.3872	17.7411	13.6414	21.7655	15.6665	10.7725	13.3606	13.1336	22.8309	23.8896	20.8531	14.4802	18.1662	26.9053	21.9423	18.8911	27.8871	16.0759	14.9377	17.1313	35.0561	16.2276	22.1198	20.181	16.0143	15.5438	19.4044	19.9791	12.0791	18.9655	15.039	24.6624	11.5578	19.2368	16.4042	20.399	10.6334	17.6339	18.4585	13.1649	19.5141	22.2784
ZC3H13	0.690522	3.30293e-10	3.96072	5.01025	7.16526	4.84371	6.05078	4.11427	14.0445	7.59526	9.6309	6.87043	10.3615	6.33593	8.34083	2.16646	8.68334	10.3436	14.2791	3.74416	2.9776	7.01021	7.4557	7.20143	6.96631	8.53747	10.5237	4.53427	12.7827	9.25859	7.7839	5.27214	9.3822	9.29747	4.66433	3.29748	9.11076	6.10769	5.3322	4.84852	7.82779	10.1199	6.1572	5.72182	11.1063	4.80403	7.60795	6.59834	5.85021
METTL16	0.929884	0.0644554	2.38676	6.79511	3.96056	2.76037	5.65761	6.3971	3.99775	4.09899	6.38613	3.69638	5.10835	3.65195	4.81389	4.67758	5.55615	5.20996	5.20596	3.68426	8.17164	4.80622	5.4001	4.813	4.22306	3.92416	5.49574	4.5466	6.48886	4.90857	4.67355	4.66829	5.14244	4.66729	4.19751	5.73379	5.56369	4.83719	5.96537	4.23752	4.49571	3.28712	4.7434	5.05851	3.27503	4.21191	4.64111	4.4781	5.05768
TRA2A	1.18851	2.21322e-05	24.0521	24.6965	24.3822	16.5771	17.8985	25.4429	17.8693	21.2685	19.4098	31.1372	27.4973	27.3999	16.9782	20.9498	28.5491	26.0939	19.3879	27.8689	16.5548	16.9065	33.3725	14.1943	20.0507	18.3937	14.9938	19.2082	13.3546	15.484	21.4178	19.3572	18.7056	20.937	22.4364	21.7809	19.8445	14.1163	18.0332	21.9741	20.2523	37.4722	21.9735	12.7071	19.0018	18.3278	18.9321	23.8009	15.1182
CAPRIN1	1.08083	0.119643	25.578	46.7935	24.2812	39.0249	25.3472	26.2363	59.1583	25.0257	52.3005	27.9447	34.5977	21.2366	28.8775	14.2533	51.0868	26.643	44.1391	21.3446	19.5219	25.4848	39.1199	27.2739	31.5919	26.8502	29.5139	32.1601	46.6642	29.3196	32.9539	33.838	33.6595	41.2699	28.2068	16.6698	30.3365	25.0803	40.1103	27.2762	26.1989	42.9016	30.026	16.3234	35.534	29.8661	26.635	27.6874	42.6675
ALKBH5	0.915018	0.00386312	34.3915	50.1579	53.3998	48.7686	46.307	52.3722	50.8123	41.0135	58.2739	33.1398	36.4909	33.2157	33.4593	28.1764	36.0032	39.3934	29.1039	38.2599	36.6007	36.0437	41.2315	38.23	39.9721	36.3502	45.4849	45.0805	39.1254	50.1988	36.3493	46.2298	33.6745	29.246	36.7459	47.1542	50.2773	39.0578	40.3485	27.2071	35.9789	46.8705	36.6224	38.4576	28.8442	33.6053	39.0845	51.962	32.2626
FTO	0.709879	1.1266e-11	1.8577	1.63677	2.10922	1.44487	1.49522	1.35972	3.49124	1.58892	2.56349	1.82682	1.57039	1.77528	2.3788	0.742367	2.15891	2.62257	1.91402	1.05576	0.972294	1.92149	2.50021	2.04878	1.86647	2.09458	2.98137	1.90758	3.03943	2.38141	1.50191	2.32365	2.05123	2.05554	2.02062	1.38979	2.22728	1.96605	2.50048	1.71683	2.23874	1.88137	1.11411	2.12592	2.81034	2.17987	1.66303	1.73826	2.48855
EIF3A	1.04334	0.491234	31.672	47.0804	32.4633	47.2949	34.8848	33.8156	37.5816	33.1823	69.2667	39.1624	48.0998	30.651	39.8148	11.2473	67.3644	36.1203	58.4177	24.7068	18.9607	41.6583	54.4963	37.2283	36.6442	41.0077	42.6643	50.6849	67.3794	36.1641	29.4156	56.9688	44.9041	48.203	41.1748	15.8443	41.4639	42.5496	39.9029	49.036	41.1757	47.1767	47.2744	38.2264	54.1712	44.2075	42.7145	38.9907	51.9393
EIF3B	1.62372	2.15046e-17	21.8869	30.936	21.4284	37.9639	31.6159	34.8881	19.8002	32.8486	50.1451	42.6571	23.2245	17.1453	23.216	99.9914	38.6961	17.1652	23.0416	21.226	44.2625	24.3827	30.0722	24.6236	23.3457	19.2037	21.988	25.9044	35.5133	26.1809	31.1975	31.6938	21.9994	30.3259	32.1117	39.6824	24.0679	25.2937	28.0109	44.8705	21.3227	36.7722	30.6095	29.599	27.2143	29.6144	29.3643	32.6982	23.8228
EIF3C	1.23046	0.0023804	0.932002	1.3999	0.855575	1.58452	1.19134	0.691296	0.779995	0.744033	1.58511	0.752667	1.2875	1.04247	1.1087	0.329972	0.99049	1.21133	1.18649	0.899032	0.381172	0.75065	1.78207	0.771962	0.98622	0.743796	0.938973	0.720289	1.43033	1.23263	0.974641	1.15846	0.986862	1.29848	0.996305	0.627468	0.669491	1.21249	1.49471	0.951689	1.11564	1.97196	1.62778	1.3959	1.53533	1.09125	0.942905	1.27866	1.33819
EIF3D	1.23743	5.6308e-06	52.7812	60.6452	53.1064	83.3525	84.0162	80.7965	57.9431	77.0078	86.3319	84.6103	61.6819	57.3465	59.7258	93.7301	113.359	59.5975	59.8555	43.3635	89.385	62.2709	70.7245	63.4776	81.7754	43.4314	59.9613	67.9352	74.2494	72.4929	107.483	78.1339	62.1965	81.511	75.7113	61.1749	63.4493	64.1501	83.3281	54.4887	54.2878	133.794	56.3535	74.4868	73.3627	69.1448	65.879	69.3583	57.8756
EIF3E	1.12972	0.0266712	38.6034	114.294	39.9876	99.5003	54.7546	54.1082	49.9239	78.9293	60.4003	50.9036	45.6788	48.3855	48.8683	42.6766	136.717	57.5995	49.3733	33.1949	54.1864	43.9777	55.622	45.2159	68.4734	29.233	37.3719	59.0202	71.2798	50.3412	119.381	98.9926	54.9763	67.2442	60.9331	45.4811	52.4846	51.8238	95.7654	53.1815	44.5201	96.2245	41.396	57.7696	57.6176	48.1959	41.3586	44.078	42.9189
EIF3F	1.12338	0.0146867	15.3935	22.4637	19.2954	23.9508	17.8778	21.8846	11.2709	18.3631	19.3542	19.9146	18.1391	17.3471	17.5269	31.8047	21.401	19.0236	17.5273	11.1692	36.5629	17.9632	16.8552	17.5484	22.563	11.9771	16.2296	18.2319	17.2251	19.8146	32.2643	22.9129	15.6607	15.8401	20.8761	23.5898	17.4219	17.8393	26.3733	17.168	16.0557	24.6541	16.4257	11.1187	17.8701	19.8579	15.0245	21.6142	15.0278
EIF3G	1.32118	6.58796e-06	39.8405	53.1889	45.7366	81.2563	70.2244	64.0287	37.6803	49.1276	59.4772	71.1631	39.7504	49.8863	49.865	148.287	56.3185	36.2393	37.8376	41.8649	121.236	45.1384	43.2844	55.8371	53.294	37.9906	42.9594	61.7125	41.7961	49.1357	39.7655	60.9253	44.6638	42.8451	52.3651	77.356	43.2232	56.9904	47.034	44.5987	41.9474	62.328	44.9756	39.3259	43.177	45.8411	50.1119	55.4748	47.1981
EIF3H	1.19456	0.000839489	29.9152	89.5316	27.711	87.8031	42.2994	49.0555	44.5362	44.7827	34.9802	33.2017	28.8651	33.5647	32.7896	37.2399	53.5993	37.006	34.4396	15.2418	55.8629	30.8851	34.5318	33.4342	45.5747	21.159	28.3217	42.1926	47.4975	36.3562	93.4587	66.5044	31.9997	38.6558	38.0103	33.6994	35.0536	34.4467	49.535	42.3311	30.0664	51.6947	32.1574	41.4944	36.2566	32.0148	28.7996	34.6403	34.7882
EIF3I	1.3978	2.41405e-10	129.428	212.722	222.141	245.399	217.535	197.262	128.79	261.245	225.764	190.504	129.721	90.6668	133.091	308.183	252.288	91.2093	95.9161	104.193	244.278	154.632	198.653	126.01	152.715	122.89	119.224	157.868	147.407	143.461	149.828	185.902	138.888	166.204	179.986	189.867	201.348	150.605	178.283	123.879	101.727	167.24	121.309	121.819	156.34	162.704	151.72	180.286	115.656
EIF3J	1.17503	0.000267909	16.7985	37.3356	20.9967	15.3183	18.699	25.0979	25.437	27.0586	33.6305	25.9135	21.9218	13.9068	16.7063	10.5158	35.1372	18.3631	17.5529	14.3173	12.2295	18.6093	29.094	18.3751	20.2742	15.1517	14.3805	29.2822	25.7554	16.8228	31.5038	25.3065	19.4649	27.3505	31.7665	15.7113	22.5135	19.8438	27.7557	20.9952	15.6204	31.3514	22.554	24.0714	25.3318	24.8204	18.129	25.0253	24.679
EIF3K	1.10342	0.126359	41.9871	58.2543	45.3506	58.4872	67.1487	78.2242	35.5599	56.8143	53.477	67.8553	43.7755	46.6774	45.2951	166.932	76.7668	52.0199	40.27	35.0578	153.619	51.5955	51.9003	56.5094	66.7734	30.8461	49.8474	49.2859	44.6389	63.6311	77.6009	66.2669	48.9178	57.0514	55.2636	74.6139	54.1451	57.2259	57.657	41.8883	48.4022	66.9738	51.7675	53.1343	50.5449	48.0466	45.4409	62.5238	42.9027
EIF3L	0.922529	0.148424	32.5227	57.9803	44.4019	68.8311	52.4825	44.4108	39.85	45.6172	67.1658	48.7257	52.3798	41.7886	53.5122	11.7982	94.2852	64.2991	65.244	22.8424	35.7992	57.2199	69.346	55.7352	62.7904	31.8147	66.5535	61.9348	69.228	74.1265	108.899	69.9499	58.8366	72.3473	61.9613	30.3371	57.4091	57.2421	88.0478	42.6842	51.0736	104.177	50.8841	52.2093	73.8302	52.1877	49.3697	53.145	54.6546
EIF3M	1.24379	2.64744e-06	18.4367	24.8862	16.829	25.3755	20.4917	23.8354	13.1812	20.7505	24.4325	23.6164	19.4537	15.8724	15.4817	36.1336	34.8442	19.6109	15.6135	11.7885	28.7469	17.9242	20.0307	18.3791	20.995	11.3894	13.0857	21.4049	17.8939	18.5662	32.2432	24.2291	16.5862	21.8871	23.5516	19.539	18.5468	20.4439	29.0981	15.31	14.7275	29.6361	17.0909	15.7797	19.4517	18.3436	16.4897	23.1422	18.5595
FMR1	0.848281	4.16011e-05	3.44597	4.39682	4.57771	3.74353	4.01975	3.90191	6.60982	4.66436	4.54651	3.83327	5.1047	5.35586	4.09132	2.04495	4.50868	6.1388	4.4837	0.774161	2.84601	3.29463	4.29565	3.32944	4.63863	5.37735	3.73235	5.22083	5.25706	4.23198	2.78156	4.78167	4.38104	3.62695	3.80631	2.79351	3.79344	3.77369	4.25378	3.56225	4.84848	4.05871	4.13458	5.11751	4.15182	3.59138	4.71798	3.97085	4.58487
HNRNPA2B1	1.29441	1.83594e-12	75.5498	94.7409	71.1622	87.3793	96.8804	92.1266	68.7193	67.4119	70.8321	76.4608	83.9943	67.0705	61.2196	35.8585	75.4498	68.1916	61.284	77.7814	52.8507	55.8639	82.0184	59.5255	74.4938	67.5208	57.8879	100.981	67.2324	57.2993	91.1627	79.8323	64.9292	79.696	80.3606	61.7587	62.5896	65.7907	65.2789	100.227	67.2464	99.3852	77.6358	78.42	77.5518	67.5242	66.3963	87.0827	88.2334
HNRNPC	1.13104	0.000250864	48.6246	61.8794	49.819	74.2323	77.5778	70.5618	61.7266	56.4619	59.819	53.0572	57.5337	46.561	44.8664	39.0203	81.7987	50.2909	48.006	48.2114	45.2996	46.2019	60.1442	45.7297	61.0537	43.1056	45.7778	56.0201	51.5779	43.2429	71.3507	65.9431	49.7934	64.6345	59.6528	38.4618	60.0206	44.664	55.9014	35.4477	43.2577	85.2762	48.125	51.1904	52.926	43.7974	47.7303	57.9639	62.141
IGF2BP2	0.479849	2.38298e-10	0.471346	0.257743	0.238176	0.0573598	1.46818	0.0810848	0.409253	0.465032	0.119671	0.496624	0.219055	0.881917	0.787003	0.155429	0.0919592	0.755686	1.17056	0.171232	0.860118	0.708512	0.0864132	0.673613	1.09168	0.337758	0.592731	0.1204	0.79446	0.245067	0.309322	0.26089	0.253483	0.103751	0.332111	0.160236	0.235047	0.398908	0.218107	0.235851	0.359099	0.168803	0.191509	0.339658	0.392229	0.487894	0.235792	0.285925	0.139993
LRPPRC	1.11545	0.0352485	12.2049	18.6402	9.46965	19.0249	6.98905	7.25501	31.3224	13.6481	22.9364	12.8847	16.2617	8.929	14.0513	8.02575	26.9649	14.6919	21.0119	10.1442	9.04383	13.1584	15.3304	13.7955	12.8165	11.5734	12.5971	18.7855	19.7807	14.3134	23.9828	16.4419	17.064	20.1504	16.5292	8.38562	10.5927	13.0153	24.7157	18.0309	13.6547	21.2553	13.7258	22.6577	15.8272	15.4036	16.37	12.6713	15.3265
PRRC2A	1.29733	1.93897e-08	36.6864	54.2151	55.1935	76.8204	74.0135	43.8153	95.2064	56.7835	94.5503	59.031	52.7263	39.5728	52.4504	29.274	42.9961	37.5283	86.2013	49.8596	25.2314	45.4361	64.4917	51.5586	38.1296	52.7059	56.9047	52.7342	83.1494	59.6747	39.1774	54.2101	50.7398	61.0052	45.3248	40.913	50.9085	40.5207	53.8775	54.4329	47.0314	59.4047	56.0989	51.3733	66.7862	58.3149	56.2093	44.2879	54.6699
PRRC2C	0.840296	0.00340171	7.85832	11.745	9.19546	8.67705	6.74491	6.03898	22.7354	11.8466	13.311	9.81352	10.8645	9.88132	10.8194	5.08655	9.10644	15.5568	21.486	9.70569	3.51937	13.1917	14.8074	9.64442	9.3386	12.4961	13.8846	8.9398	17.8541	11.6556	10.8141	9.75773	10.9134	12.598	10.1268	5.70899	9.61279	8.83111	8.26459	11.437	11.1799	10.7077	11.0622	15.5415	13.4602	10.3739	9.75994	7.58235	13.1356
RBMX	1.14468	2.07278e-05	24.9831	32.931	23.0797	45.4081	23.4777	35.6531	25.6401	28.9885	24.6587	28.9337	28.3597	27.7076	27.894	20.9767	34.8537	32.465	26.9112	28.1508	22.6879	20.5372	29.3079	21.7338	28.3843	20.4746	21.374	29.6962	24.7022	24.8653	35.1747	33.0725	25.3555	32.3574	27.3922	19.6314	23.8495	26.3899	39.2412	26.207	24.6611	43.764	23.6128	22.4974	30.3336	24.211	21.6746	21.7793	27.8917
YTHDC1	0.956713	0.105695	12.462	10.0399	12.2913	14.355	11.2718	12.0312	13.8831	12.8049	14.444	13.2307	13.4718	16.375	12.3983	8.02683	15.6405	16.0285	13.3688	13.2278	8.38349	10.5493	13.5865	12.0647	12.6266	12.7437	11.4387	13.8661	12.1701	12.0049	17.4829	12.0711	12.3144	14.2516	12.7915	7.51785	11.9603	11.2167	12.7345	8.23433	13.4525	18.2705	13.1747	11.9706	15.5777	9.94415	11.7709	12.8184	13.179
YTHDC2	1.17827	0.00532443	3.01561	4.66115	3.34636	3.56741	2.51482	2.26421	3.3253	3.05766	4.41051	4.16105	4.17911	3.61728	3.35711	0.976273	4.34783	3.9849	3.88686	3.64047	1.20418	3.53395	5.0176	2.44587	3.29778	3.26793	2.84531	1.90504	4.41577	2.776	4.90199	2.92871	3.23043	3.98868	2.19112	1.08163	2.95714	3.01084	3.14087	2.10459	3.02939	5.29205	3.63579	4.09803	4.38159	3.4359	3.63956	3.6082	4.5862
YTHDF1	1.14506	7.45123e-06	14.7114	21.5086	22.2762	20.3171	27.8836	22.9627	30.3236	21.6823	27.7066	19.2276	21.3998	18.3371	14.9591	25.0673	19.1654	21.527	18.5528	18.3263	18.4698	18.7056	24.4637	16.6638	18.4675	20.9689	21.3015	19.9473	20.7906	21.575	20.3827	21.8476	17.0151	16.9657	23.2139	22.117	20.7273	14.9323	18.6149	20.1914	18.801	24.6819	26.2342	23.9903	21.8089	18.0344	21.5938	19.3476	18.4647
YTHDF2	1.13046	0.000113308	12.5005	21.673	18.6944	16.8116	22.0188	21.7104	24.6056	14.7856	21.796	20.024	17.0417	14.6945	13.7198	14.6433	16.8587	19.5561	19.0546	14.9749	10.8462	13.8676	20.5648	15.3813	15.293	13.76	16.5	17.1527	16.1887	15.8368	14.8779	17.4233	13.8578	18.6672	20.8736	16.0649	16.7008	14.7959	17.3177	14.0692	14.7189	20.9059	19.4173	16.7621	16.4728	14.5862	17.808	16.5755	14.7028
YTHDF3	0.991974	0.883713	10.323	9.52963	11.7228	13.306	19.9247	12.9088	13.6667	9.67089	19.6929	10.6138	14.3054	12.3483	13.4221	6.36016	21.9602	15.6879	20.0658	10.1723	10.5372	9.89878	19.2805	9.51763	10.4269	13.8904	15.5589	14.0935	22.4896	14.7384	20.405	13.4343	14.4908	12.6354	10.2784	7.83923	15.2359	10.4461	16.7129	12.9228	13.5747	16.1485	16.6459	19.4205	15.411	13.3683	15.2266	14.1324	16.1513
[truncated: 503 more columns]
