# Supplementary material for: Systematic Investigation of mRNA N6-Methyladenosine Machinery in Primary Prostate Cancer
Source: Dis Markers. 2020 Nov 12;2020:8833438. doi: 10.1155/2020/8833438 (PMC7676945; doi:10.1155/2020/8833438)
Supplement: Supplementary Materials — include a word file, six figures, and nine spreadsheets. The supplementary materials.docx includes four tables and provides a description for each supplementary material file. [file 8833438.f1.zip › 8833438.f1/Excel S3.xlsx]

## Sheet: Sheet1
Excel S3 Expression Variations of the mRNA m6A Regulator Genes among Prostate Tumor Grades
m6A Regulator	p-Value of Expression Variations between Tumor Grades	Mean FPKM Value in Grade 6	Mean FPKM Value in Grade 7	Mean FPKM Value in Grade 8	Mean FPKM Value in Grade 9 and 10	FPKM Values in Grade 6 Tumors
						TCGA-2A-A8VL-01A-21R-A37L-07	TCGA-2A-A8VO-01A-11R-A37L-07	TCGA-2A-A8VV-01A-11R-A37L-07	TCGA-2A-AAYO-01A-11R-A41O-07	TCGA-2A-AAYU-01A-11R-A41O-07	TCGA-CH-5738-01A-11R-1580-07	TCGA-CH-5768-01A-11R-1580-07	TCGA-EJ-5517-01A-01R-1580-07	TCGA-EJ-7321-01A-31R-2263-07	TCGA-EJ-A65M-01A-11R-A29R-07	TCGA-EJ-AB20-01A-12R-A41O-07	TCGA-EJ-AB27-01A-11R-A41O-07	TCGA-FC-A8O0-01A-41R-A37L-07	TCGA-G9-6342-01A-11R-1965-07	TCGA-G9-6347-01A-11R-A31N-07	TCGA-G9-6371-01A-11R-1789-07	TCGA-G9-7509-01A-11R-A41O-07	TCGA-H9-A6BX-01A-31R-A311-07	TCGA-HC-7075-01A-11R-1965-07	TCGA-HC-7077-01A-11R-1965-07	TCGA-HC-7209-01A-11R-2118-07	TCGA-HC-7748-01A-11R-2118-07	TCGA-HC-8213-01A-11R-A29R-07	TCGA-HC-8258-01A-11R-2263-07	TCGA-HC-8258-01B-05R-2302-07	TCGA-HC-8259-01A-11R-2263-07	TCGA-HI-7170-01A-11R-2118-07	TCGA-J4-A67Q-01A-21R-A30B-07	TCGA-J4-A83K-01A-11R-A352-07	TCGA-J4-AATV-01A-11R-A41O-07	TCGA-J4-AAU2-01A-11R-A41O-07	TCGA-J9-A8CN-01A-11R-A352-07	TCGA-M7-A720-01A-12R-A32O-07	TCGA-QU-A6IO-01A-11R-A31N-07	TCGA-QU-A6IP-01A-11R-A31N-07	TCGA-V1-A8MF-01A-11R-A36G-07	TCGA-V1-A8MK-01A-11R-A36G-07	TCGA-V1-A8WN-01A-11R-A37L-07	TCGA-V1-A8WS-01A-11R-A37L-07	TCGA-V1-A9OF-01A-11R-A41O-07	TCGA-V1-A9OQ-01A-11R-A41O-07	TCGA-V1-A9OT-01A-11R-A41O-07	TCGA-VP-A87E-01A-31R-A352-07	TCGA-XJ-A9DQ-01A-11R-A37L-07
METTL3	0.0015359	8.60224	8.38733	9.15538	9.26188	9.94827	10.7275	11.859	8.99367	9.55206	8.22168	9.3824	6.64937	8.98809	9.68136	5.21889	8.37521	7.12945	8.04029	3.20141	8.30364	9.23834	5.78796	12.8995	8.30999	7.68504	6.24383	12.0114	10.2408	6.51228	14.5286	4.11271	4.54592	9.62529	8.39133	8.18673	11.7432	8.70387	5.33753	9.55893	7.53375	8.3047	9.34672	5.90088	9.7275	9.09948	9.63098	7.59475	8.29546
METTL14	0.305819	3.83205	3.87313	3.81357	3.67707	3.64619	3.64001	3.53369	4.08596	4.58136	4.53284	5.38648	5.56545	4.91857	3.08333	3.2096	3.97545	3.5018	4.47732	2.50988	4.77957	4.2032	3.9267	5.08885	4.14432	4.71746	4.58315	5.04652	3.38104	4.42644	3.64655	3.49244	2.2579	3.72908	3.45633	4.00987	2.64222	3.58949	2.05688	3.46297	2.93538	3.7371	4.14783	4.98595	3.9624	3.49796	1.8717	3.21825	3.25911
CBLL1	0.993361	8.49164	8.77366	8.6833	9.3597	9.66656	8.06266	6.46621	8.13463	6.43327	6.41539	10.7887	9.13083	8.03405	9.19204	4.21472	6.82063	27.58	6.42902	4.13964	9.20463	8.4631	6.81196	15.0038	7.99279	6.76288	7.55917	7.88355	8.43882	13.1926	5.8693	7.36587	6.17965	6.64821	3.81868	10.2079	14.7742	9.86179	3.65824	5.80271	6.27938	6.76434	7.53973	8.46462	11.9845	9.54517	4.90738	16.5976	7.27908
RBM15	0.862194	2.34349	2.41571	2.38489	2.39329	1.79084	2.12676	1.65573	2.12707	2.38687	2.40931	3.5453	2.41623	2.93447	2.63509	2.39099	2.21564	1.54017	2.09862	2.36373	1.7285	2.01686	1.78096	2.46917	2.82487	3.18009	3.24684	1.81542	2.24744	4.99135	1.70359	2.18959	2.26378	1.94421	2.38347	1.99089	2.1139	1.5241	3.33798	2.12018	2.27137	1.74142	2.3131	2.83005	2.19826	2.35478	1.97287	2.99541	1.70717
RBM15B	0.0016216	13.6182	15.3571	15.1888	15.8761	13.1235	9.91696	14.9745	10.9667	20.9092	14.2791	20.6847	13.8825	20.9451	14.4784	11.6028	14.3447	12.4537	14.6982	9.30257	19.8038	15.6862	11.4049	13.8661	19.358	17.8085	16.7551	12.905	13.0957	4.16416	17.0774	12.7865	9.21814	13.9863	13.6893	14.6983	12.0889	9.97833	8.94828	14.7747	11.8306	10.5042	11.3037	18.4128	12.8625	12.631	12.1423	11.6715	12.2518
VIRMA	0.00040716	4.93108	5.39334	5.34178	6.09446	3.70591	3.86131	4.83194	4.02469	5.22886	5.48736	7.18219	7.78773	7.46097	4.11299	4.71783	5.25995	3.8223	4.44435	4.1621	5.50594	5.51318	4.56762	5.94419	6.5908	6.33874	6.38984	5.74523	4.98971	5.62948	5.21177	4.60718	3.4826	4.65732	3.77762	4.74865	3.38727	4.93159	3.49628	3.79582	6.46668	4.22032	5.6213	6.5917	4.16757	4.33825	3.35258	4.0005	3.54717
WTAP	2.44408e-08	19.7008	19.6187	17.7372	16.8805	19.435	18.1759	18.4032	20.3528	15.6948	18.2975	18.5903	47.2993	21.3963	20.7047	12.0185	18.9807	24.6829	19.549	15.3094	23.8138	22.4979	15.1217	24.6482	21.7655	12.2402	15.7871	23.8896	21.9423	11.8239	22.6127	19.2709	17.8489	16.8887	31.257	18.7965	21.0543	15.8781	22.5451	16.546	14.0329	18.0448	14.8472	18.1978	22.4429	19.101	18.7063	20.7564	14.1595
ZC3H13	0.158145	8.01206	7.72749	7.53041	6.92001	7.68465	7.54753	8.44167	4.92767	10.6717	10.3871	7.25734	12.3766	9.26712	3.26199	6.25391	8.3487	5.91936	9.92044	3.27339	10.6567	7.23808	8.30446	11.2858	9.6309	7.68544	15.2915	8.68334	7.01021	25.5638	10.1768	8.04957	3.51525	7.72468	6.52165	6.89282	6.39872	7.68674	1.98479	5.8603	4.4989	8.31859	10.7931	11.0802	7.32609	3.24235	5.50048	7.86371	6.28653
METTL16	1.92608e-06	5.18087	5.1835	4.7089	4.60297	4.13081	3.84465	5.07278	4.2502	5.09257	5.73933	6.16668	5.03251	5.95392	4.28041	5.60183	4.27212	4.7307	5.26213	7.81744	6.59329	3.50212	5.49103	5.46989	6.38613	5.87871	6.22396	5.55615	4.80622	5.75099	5.18783	4.20853	7.24339	5.06108	3.94831	4.25757	3.81607	5.225	11.4816	4.18437	4.43972	4.55782	4.87789	4.88522	4.55024	3.77856	6.26146	4.76918	3.91729
TRA2A	0.00808709	20.9219	21.2386	23.3817	22.4222	28.886	25.0617	27.4428	18.5331	21.956	19.6828	24.7614	19.337	15.141	20.9644	22.8864	16.0915	23.0384	27.4056	14.6472	23.6821	18.2746	17.9389	24.1648	19.4098	20.6511	18.6122	28.5491	16.9065	13.3129	20.2002	12.9095	22.8283	21.2654	19.2218	18.4366	22.778	15.267	14.8685	23.7235	17.5235	21.395	21.7304	23.7773	16.6096	18.2152	36.5291	15.7642	27.4818
CAPRIN1	0.237179	30.4283	33.3321	33.1627	33.6119	23.7573	23.8506	30.975	27.0554	37.2868	36.2167	50.1687	50.1708	51.5624	22.9792	18.5105	29.2265	20.8168	38.1807	15.7481	44.6577	30.6687	22.629	45.3365	52.3005	45.6608	45.2512	51.0868	25.4848	22.8128	34.6751	32.0987	15.0258	29.8515	21.4328	25.0072	28.9184	26.5442	14.9111	21.6273	23.5953	25.3217	32.5302	39.3844	27.9056	25.0974	14.7223	22.3058	22.4803
ALKBH5	0.00698113	40.7108	40.2274	37.7209	38.3419	37.6696	34.0351	34.2093	37.1446	46.8776	37.1937	36.8994	43.0099	44.7577	42.6025	51.2894	39.4486	40.5471	49.7484	38.7259	58.4223	48.933	49.1399	45.1586	58.2739	49.8263	38.9602	36.0032	36.0437	29.8442	38.1132	46.1174	30.6208	37.9639	40.2409	42.3534	37.031	37.366	26.3384	35.906	35.0469	39.4066	36.8604	43.038	36.409	39.5349	38.1068	42.5286	36.9424
FTO	0.314437	2.17882	2.13139	2.06078	2.00676	1.7273	1.52367	2.20591	1.52987	2.44795	2.82622	2.29949	2.84714	2.97717	1.27213	2.9107	2.13664	2.28585	2.46552	1.23998	2.94574	2.56489	2.89937	2.40803	2.56349	3.09027	2.68378	2.15891	1.92149	4.94613	2.1355	2.99353	1.02714	2.15813	1.96964	1.89589	1.39177	2.19617	0.697975	1.55317	1.34199	2.06166	2.37801	3.26196	2.39413	1.5004	1.35074	1.80634	1.75277
EIF3A	0.795926	40.7243	42.5972	41.4614	40.0155	31.5024	35.6121	41.9271	31.0073	47.431	44.852	67.047	53.6583	69.4326	24.3141	20.3681	41.7299	22.3351	47.0369	12.451	56.7917	43.8451	31.3687	59.5422	69.2667	41.4238	57.6427	67.3644	41.6583	40.1411	43.5666	42.7795	11.4058	44.157	35.445	50.3075	42.0275	36.823	13.0946	25.6457	38.8143	38.5279	45.088	55.4963	40.9397	43.0941	10.2558	41.6531	25.9694
EIF3B	0.259136	30.2665	31.6262	29.0727	30.3713	20.5278	28.8827	27.3695	26.5051	27.1995	20.1552	36.2508	24.7928	34.2279	36.9648	31.1464	22.008	18.6126	29.9481	66.0518	42.9941	22.867	21.0536	33.0487	50.1451	27.0701	20.842	38.6961	24.3827	7.52388	26.8608	27.1373	52.4016	28.6285	21.2091	29.1934	43.7056	21.7708	73.9332	33.2127	29.9697	23.8378	19.4676	38.606	21.0637	30.6307	28.3735	24.3746	19.9385
EIF3C	0.345506	1.00651	1.05754	1.11873	1.09085	0.706749	1.13039	1.17648	0.901491	1.59359	1.57246	1.49887	1.75953	0.824794	0.47099	0.537488	1.27973	0.380145	0.730117	0.217654	1.21342	0.775821	0.666276	1.78019	1.58511	1.4142	0.888976	0.99049	0.75065	0.459927	1.8865	1.09158	0.362897	1.20288	0.597514	1.33837	1.58517	0.836939	0.335476	0.615666	0.985885	0.777428	0.813925	1.81414	1.09581	0.873851	0.362392	0.860529	0.865568
EIF3D	0.00206415	70.8975	72.2665	68.0736	64.0121	51.8207	63.68	80.8579	48.7285	67.0221	61.2504	93.684	55.6791	114.88	73.4443	85.4331	67.7224	53.0814	66.3909	99.926	94.6319	60.1837	52.2309	75.2516	86.3319	62.8646	47.6268	113.359	62.2709	16.3183	74.3365	64.4949	88.5871	67.7575	51.382	75.4946	64.0271	55.5978	114.485	83.2944	77.5764	61.0751	49.8979	108.503	58.7868	97.1614	60.0931	56.0231	50.2253
EIF3E	0.098694	55.5551	58.3668	59.0041	64.9307	42.1632	52.6754	68.8611	41.309	46.4732	58.9492	91.3243	66.3073	94.7341	48.435	71.7754	51.253	52.1518	43.7515	43.5765	70.8718	49.7673	42.2082	50.073	60.4003	51.5777	44.4859	136.717	43.9777	23.6362	58.1177	62.5881	50.9431	51.3041	38.9461	54.4643	53.3194	42.5282	42.3884	52.7223	67.147	42.7043	41.819	84.7354	56.3547	73.5857	60.6336	35.5763	44.6196
EIF3F	0.192642	20.3916	20.7808	19.3485	19.2716	18.2244	17.715	24.2154	15.2797	18.3466	14.281	23.7564	17.1212	23.2975	24.6273	31.7941	18.1763	17.728	18.1776	41.425	21.4999	18.8767	18.6841	16.7693	19.3542	19.671	12.2324	21.401	17.9632	8.84486	15.7514	22.9283	37.6003	20.2669	17.3854	15.7984	16.1199	17.5705	39.7185	20.0549	20.607	16.9553	14.8935	23.9845	18.9619	25.548	20.3286	15.6885	18.7697
EIF3G	0.145049	58.6595	56.7917	51.4869	49.5622	43.2433	67.9122	58.2923	48.3367	45.4564	34.3917	47.8275	33.9737	59.874	55.087	84.3036	47.9811	53.2385	48.311	130.138	60.9142	46.0884	48.7801	50.615	59.4772	46.9945	29.6376	56.3185	45.1384	5.98221	45.5588	62.8073	131.181	54.435	49.2548	60.6069	67.4064	44.5384	163.292	66.5596	63.3976	47.2903	32.0957	65.4072	54.1747	81.6729	90.586	46.8312	47.65
EIF3H	4.79368e-06	35.474	40.1575	39.1127	47.3883	28.2437	33.2257	41.4393	27.6478	34.1902	31.2987	48.015	38.9537	56.2498	42.8075	47.9187	35.5514	32.4759	35.6696	41.9438	45.0921	32.7587	31.2246	32.4449	34.9802	31.0392	25.0687	53.5993	30.8851	13.8691	33.1063	40.028	41.7525	34.5172	29.5949	32.9179	34.7926	32.9944	43.5384	32.5682	49.2309	29.1072	25.6292	47.0012	37.1383	44.1716	26.032	25.8583	28.7386
EIF3I	0.0231339	170.676	175.169	157.778	156.916	161.711	156.554	237.85	123.303	143.58	126.387	166.734	151.51	208.272	197.925	153.284	137.653	107.94	169.002	246.07	255.095	157.055	97.8662	184.831	225.764	188.485	134.478	252.288	154.632	20.2583	186.72	167.229	204.202	147.166	104.982	174.166	199.977	140.819	227.978	189.919	227.551	125.389	121.323	209.274	182.93	247.014	210.421	119.313	150.508
EIF3J	0.417312	22.1817	22.7052	21.4983	22.0731	18.2289	19.1975	24.7633	20.2876	25.137	23.8406	40.0872	37.2372	30.9527	21.2259	12.4196	19.1376	12.1819	24.5881	13.9388	37.6639	20.9394	13.3436	27.8707	33.6305	25.9357	22.2489	35.1372	18.6093	7.95781	26.8483	26.4053	14.5754	20.7354	15.0466	20.37	28.0693	16.014	12.6335	16.7798	25.977	18.4778	18.0587	31.1331	17.71	29.9135	9.98523	21.9919	17.7717
EIF3K	0.115142	65.5155	65.5533	57.5288	57.382	50.9537	57.5237	55.1211	56.1567	51.2833	40.3912	59.4855	47.1555	69.7837	83.5932	97.5024	54.7644	56.713	58.6259	221.164	67.6794	49.6051	62.7396	51.0183	53.477	46.2561	33.0476	76.7668	51.5955	10.3966	57.6166	58.8055	159.274	54.9321	54.1585	55.9087	62.6131	52.6365	189.458	65.1203	60.8076	61.0778	35.8106	77.2697	55.6321	73.3428	64.1461	49.7245	49.7692
EIF3L	0.308158	53.2939	56.277	52.5946	52.1839	30.4253	44.9378	62.6437	34.8009	58.8673	61.042	100.847	56.2644	100.793	36.5018	41.5219	51.3494	56.7266	59.9138	12.9901	82.6582	57.6857	53.2802	58.1345	67.1658	64.1262	58.3093	94.2852	57.2199	19.2676	66.0882	56.8492	15.0499	59.0784	45.8648	55.2065	46.2045	55.7849	23.7737	49.1362	52.1139	46.1557	54.2393	82.5551	64.3792	45.3192	21.9648	39.7095	38.3955
EIF3M	0.186558	21.148	21.2657	19.7792	20.1897	16.3927	22.4323	22.7006	16.4142	17.806	18.0892	28.2032	24.2798	27.5163	27.7766	23.4014	16.4811	16.0848	18.8992	34.859	25.6601	16.7317	16.0174	20.0753	24.4325	18.1507	13.3137	34.8442	17.9242	5.90486	21.2188	20.8571	35.5693	18.2188	15.0782	19.9222	23.866	15.1094	31.4137	21.4216	19.0199	16.5955	13.344	26.7955	17.3408	33.0864	22.3559	15.5381	15.8674
FMR1	0.00248519	4.22648	4.23581	4.75708	4.62711	4.56115	4.26539	4.5189	4.54733	4.75864	4.57915	4.09247	5.94617	4.59735	3.46441	4.51452	4.02205	4.984	4.47042	2.37592	4.01155	4.16747	4.41647	4.57628	4.54651	4.77028	4.29876	4.50868	3.29463	7.85737	3.36999	3.82395	2.96493	4.00749	3.78577	3.67358	4.85762	3.9501	2.38394	3.37912	4.31118	4.70312	5.15323	4.85898	4.21042	3.25241	3.36727	3.86444	4.38326
HNRNPA2B1	1.20888e-10	71.4435	71.924	79.604	83.4277	88.1248	78.3117	98.0722	83.4091	91.302	64.4918	75.2626	76.9596	67.9662	76.7159	69.012	75.0669	62.3217	63.351	34.4394	81.4263	80.3459	53.5521	92.1617	70.8321	68.2435	64.6441	75.4498	55.8639	43.9918	72.2728	55.8975	53.0616	70.8923	59.9279	73.438	99.5056	61.9995	42.5175	66.3526	63.5787	70.7745	73.8068	93.5756	87.233	66.3941	73.1706	72.0974	77.4133
HNRNPC	0.0105944	53.4276	56.0168	57.7913	59.32	53.7378	53.5379	61.5265	58.4993	66.79	50.7152	62.0555	75.3408	75.3001	50.3173	56.4322	55.695	48.774	58.0716	41.5168	73.9653	55.9263	37.4799	65.5907	59.819	51.2583	48.9546	81.7987	46.2019	30.6046	58.5434	56.8064	42.4959	50.1509	40.6056	46.6989	59.7291	40.0003	40.2572	44.5485	38.5125	50.4002	47.785	66.154	58.9083	60.9971	43.9873	38.3938	49.5802
IGF2BP2	0.0164335	0.368076	0.433682	0.37832	0.533104	0.0342487	0.206011	0.078643	0.468878	0.0769036	0.345402	0.178023	0.268514	0.352058	0.135405	1.19533	0.221318	0.235342	0.19212	0.5037	0.238054	0.0597606	0.820842	0.206964	0.119671	0.313643	0.159984	0.0919592	0.708512	1.10903	0.0976051	1.86891	0.762686	0.137422	0.258695	0.173986	0.135077	0.391041	0.298511	0.326411	0.935397	0.251145	0.112198	0.252813	0.122722	0.347211	0.609874	0.726466	0.223537
LRPPRC	0.142752	14.7714	16.0211	15.3907	16.7602	9.41388	11.8389	15.2343	11.6316	14.8242	16.7523	26.9496	22.5347	36.5997	12.7017	11.0749	12.8563	10.0661	13.7258	9.83739	18.8007	14.111	11.6724	18.0716	22.9364	20.4267	18.2121	26.9649	13.1584	7.71449	16.4364	12.1124	11.6763	13.0098	10.3041	12.4418	13.6875	13.2328	10.7188	11.4437	13.3192	11.2841	13.3738	26.1196	13.8648	14.056	6.98268	11.4567	9.71655
PRRC2A	0.290935	49.8236	53.3307	52.4564	53.6926	51.6608	36.1135	51.6886	35.4156	72.0353	52.3727	57.3748	45.1185	77.6215	29.2113	38.0326	55.2782	51.978	58.5229	21.7802	73.1245	57.8528	41.2332	78.491	94.5503	73.0188	64.2811	42.9961	45.4361	13.5159	61.3382	49.3671	20.4616	54.8436	41.2544	52.057	53.9261	45.1594	26.7494	49.3266	35.3758	44.0188	57.1851	83.3003	49.5236	36.0333	45.2319	42.1106	38.3726
PRRC2C	0.711277	11.3075	11.3035	11.3156	10.7316	9.44292	8.40087	7.72287	8.42172	10.4939	14.0332	15.1594	11.7718	17.4593	5.18475	6.34389	10.7632	8.7645	9.80568	3.3775	11.9963	10.9452	8.57791	14.9166	13.311	17.9435	18.7406	9.10644	13.1917	64.5838	11.8392	12.8251	4.02136	9.44054	9.95158	10.9261	10.0104	9.5452	3.86519	5.9483	8.37787	9.58537	13.527	12.9876	8.98232	6.75625	5.84084	11.1772	7.33797
RBMX	0.000320476	26.4517	27.4044	28.8245	29.7305	24.7658	24.5441	35.9661	22.5845	31.4764	26.654	41.4079	26.0843	44.6236	26.6561	30.0071	23.6728	27.7183	22.0399	17.5396	26.1733	26.83	22.4493	23.9717	24.6587	24.1496	21.8544	34.8537	20.5372	18.2343	29.2316	25.1117	24.0435	26.1203	21.0573	23.5178	26.839	23.7072	25.3106	25.2948	22.585	23.2986	23.8688	42.4712	31.6624	30.2051	32.2716	19.4779	25.8543
YTHDC1	0.00188147	12.5216	12.2114	13.2386	12.9499	13.1647	12.4468	14.6528	11.2683	13.4118	11.6762	15.0382	14.0282	16.7542	10.6469	13.9366	13.0247	14.0604	10.1026	7.80083	11.7376	13.624	12.2571	13.3181	14.444	11.8353	12.7099	15.6405	10.5493	12.4318	12.8675	10.9014	9.74512	12.4339	11.3907	11.7924	13.3623	12.1435	8.55123	10.962	10.896	12.5413	14.0886	15.7304	12.8428	11.7365	12.7031	12.6596	12.7553
YTHDC2	0.170025	3.31866	3.42934	3.77579	3.61902	3.45274	2.98437	3.90051	2.63458	3.5855	3.85023	4.88339	3.77922	4.1333	2.28314	1.67509	3.05248	2.77051	3.34518	0.844958	3.13484	3.64584	2.84125	4.23725	4.41051	5.6648	4.03055	4.34783	3.53395	4.35911	4.03181	2.21571	1.05013	3.3424	3.18416	3.44058	1.71487	2.77828	1.22094	2.85344	3.38551	3.31611	4.2896	6.10363	3.64656	3.14473	2.41816	3.15274	2.76216
YTHDF1	0.0126503	19.6266	21.2801	20.5434	21.7376	21.7491	20.4973	16.1712	16.3843	21.6149	18.0655	20.2022	24.6792	21.8132	22.3675	17.8634	17.5406	15.4611	24.0846	17.9606	24.1946	18.7301	17.0208	20.9047	27.7066	25.4008	20.1169	19.1654	18.7056	9.48765	17.8508	17.3546	17.3012	18.025	18.0322	18.7747	26.7636	18.1808	25.6669	18.5747	17.2034	17.8903	19.2394	28.8837	17.1559	16.7896	20.8455	17.9303	16.3736
YTHDF2	0.122395	16.5558	17.8277	17.2945	17.5099	14.468	15.7028	14.883	15.4742	18.4895	18.2238	20.879	22.4738	19.5287	14.567	16.0058	15.8132	13.9132	17.1683	15.5549	21.6525	16.6765	14.6014	19.7865	21.796	18.3736	16.3342	16.8587	13.8676	7.04867	15.6118	18.4715	14.9052	15.203	15.1947	17.9568	16.7324	11.2821	17.6335	17.76	15.4103	13.9018	15.0349	26.3965	14.9387	17.2305	16.4273	15.8902	14.2405
YTHDF3	0.117498	13.6801	15.317	14.0842	15.4902	11.559	12.1826	13.9786	10.8182	15.4638	17.7233	17.8322	26.45	15.4562	11.2958	8.6945	12.538	10.7994	15.7992	7.73638	16.2895	13.2363	11.8876	16.4177	19.6929	20.1927	22.89	21.9602	9.89878	12.5296	12.6679	11.2603	9.35658	11.8496	9.18591	11.0872	13.3152	9.42372	9.05912	11.003	18.0214	12.1561	17.1305	15.9876	13.8287	11.0439	10.8707	11.613	10.9915
[truncated: 454 more columns]
