# Supplementary material for: Systematic Investigation of mRNA N6-Methyladenosine Machinery in Primary Prostate Cancer
Source: Dis Markers. 2020 Nov 12;2020:8833438. doi: 10.1155/2020/8833438 (PMC7676945; doi:10.1155/2020/8833438)
Supplement: Supplementary Materials — include a word file, six figures, and nine spreadsheets. The supplementary materials.docx includes four tables and provides a description for each supplementary material file. [file 8833438.f1.zip › 8833438.f1/Excel S4.xlsx]

## Sheet: T Stage
Excel S4 Expression Variations of the mRNA m6A Regulator Genes among Prostate Cancer T Stages
m6A Regulator	p-Value of Expression Variations between T Stages	Mean FPKM Value in T2a/b	Mean FPKM Value in T2c	Mean FPKM Value in T3a	Mean FPKM Value in T3b	Mean FPKM Value in T4	FPKM Values in T2a/b Tumors																													FPKM Values in T2c Tumors
							TCGA-2A-A8VL-01A-21R-A37L-07	TCGA-2A-A8VV-01A-11R-A37L-07	TCGA-CH-5738-01A-11R-1580-07	TCGA-CH-5794-01A-11R-1580-07	TCGA-EJ-A46E-01A-31R-A250-07	TCGA-EJ-A6RC-01A-11R-A32O-07	TCGA-G9-6354-01A-11R-A311-07	TCGA-HC-7075-01A-11R-1965-07	TCGA-HC-7080-01A-11R-1965-07	TCGA-HC-7210-01A-11R-2118-07	TCGA-HC-7212-01A-11R-2118-07	TCGA-HC-7233-01A-11R-2118-07	TCGA-HC-7748-01A-11R-2118-07	TCGA-HC-8259-01A-11R-2263-07	TCGA-HC-A6AS-01A-11R-A30B-07	TCGA-HC-A8D0-01A-11R-A36G-07	TCGA-KC-A4BN-01A-61R-A250-07	TCGA-KK-A6E4-01A-11R-A30B-07	TCGA-KK-A8I5-01A-11R-A36G-07	TCGA-QU-A6IM-01A-11R-A31N-07	TCGA-QU-A6IP-01A-11R-A31N-07	TCGA-SU-A7E7-01A-22R-A33R-07	TCGA-TK-A8OK-01A-22R-A36G-07	TCGA-V1-A9OH-01A-11R-A41O-07	TCGA-VP-A879-01A-11R-A352-07	TCGA-VP-A87B-01A-11R-A352-07	TCGA-XJ-A9DQ-01A-11R-A37L-07	TCGA-Y6-A9XI-01A-11R-A41O-07		TCGA-2A-AAYO-01A-11R-A41O-07	TCGA-CH-5737-01A-11R-1580-07	TCGA-CH-5740-01A-11R-1580-07	TCGA-CH-5743-01A-21R-1580-07	TCGA-CH-5744-01A-11R-1580-07	TCGA-CH-5746-01A-11R-1580-07	TCGA-CH-5750-01A-11R-1580-07	TCGA-CH-5767-01A-11R-1789-07	TCGA-CH-5771-01A-21R-1580-07	TCGA-CH-5790-01A-11R-1580-07	TCGA-EJ-5496-01A-01R-1580-07	TCGA-EJ-5497-01A-02R-1580-07	TCGA-EJ-5498-01A-01R-1580-07	TCGA-EJ-5502-01A-01R-1580-07
METTL3	0.838396	9.05192	8.58081	8.89987	8.7547	8.46674	9.94827	11.859	8.22168	8.12005	8.77063	7.83948	7.84207	12.8995	12.373	8.62224	8.49433	7.7288	6.24383	14.5286	6.05206	8.27813	10.0026	7.45562	11.026	4.96747	9.55893	8.73206	5.94019	6.37747	7.66285	15.3023	8.29546	10.3111		8.99367	9.52128	8.77014	5.79492	8.75846	9.54044	8.36381	10.2147	5.86395	9.83743	7.09621	5.86138	4.82173	7.08689
METTL14	0.229277	3.84087	3.79424	3.88866	3.67875	4.20149	3.64619	3.53369	4.53284	4.2478	4.48856	3.65389	3.05229	5.08885	3.40744	4.63494	5.36782	4.54228	4.58315	3.64655	3.2413	3.26634	3.70191	3.62733	3.28265	2.22896	3.46297	4.07411	4.35513	3.97335	3.72376	3.27664	3.25911	3.64449		4.08596	4.59188	4.80018	5.53984	4.27281	4.75368	4.63313	4.56127	4.33511	4.83613	6.05875	4.794	4.96774	3.35797
CBLL1	0.000806512	7.10931	8.99087	9.86092	7.89334	10.2535	9.66656	6.46621	6.41539	3.3614	3.58072	8.96545	5.58504	15.0038	5.58345	6.65891	10.2405	10.7022	7.55917	5.8693	3.51855	4.50006	10.5245	2.55137	5.14636	5.22501	5.80271	5.1581	6.09776	6.80973	5.50697	10.5506	7.27908	14.7317		8.13463	7.31524	6.76333	7.42124	5.65675	7.8408	14.3337	33.2433	12.5465	9.59057	12.2691	12.6303	8.42901	7.12046
RBM15	0.178085	2.34496	2.38039	2.43078	2.3542	2.84265	1.79084	1.65573	2.40931	3.09328	2.34257	2.01609	1.96253	2.46917	1.86574	2.69349	2.75675	2.32232	3.24684	1.70359	2.25881	1.86007	2.63476	2.70372	2.60553	3.08333	2.12018	2.67385	2.6976	1.97131	1.8325	2.8735	1.70717	2.30825		2.12707	2.89002	2.16487	3.43209	2.46309	2.87616	3.66071	2.85466	2.14053	2.42745	2.71943	2.90462	2.99109	2.25259
RBM15B	0.0933176	15.3961	14.7085	15.5145	15.6917	16.9126	13.1235	14.9745	14.2791	27.7539	11.2979	12.6774	15.3	13.8661	16.4665	15.8593	22.7038	13.1596	16.7551	17.0774	11.1476	12.4206	18.229	18.7129	15.8162	8.87525	14.7747	15.19	9.03603	18.8848	15.0329	19.7427	12.2518	15.6816		10.9667	19.559	15.0517	14.3049	22.4883	16.5464	17.2512	15.3527	19.099	19.3966	20.1427	15.6176	14.7707	14.7096
VIRMA	1.22309e-06	4.88857	5.1016	5.69241	5.83508	7.89015	3.70591	4.83194	5.48736	5.35901	4.64463	4.9106	3.57523	5.94419	4.01362	5.57892	8.92008	7.03686	6.38984	5.21177	3.05318	5.09327	3.9872	4.47474	3.6738	3.92141	3.79582	4.3345	5.4071	6.05939	4.52595	4.70216	3.54717	4.69423		4.02469	5.44644	5.96987	5.9838	4.89423	5.95769	8.19174	8.11361	5.80508	7.22682	7.6439	6.63498	7.03077	5.88474
WTAP	1.31308e-05	19.8906	19.5936	18.8037	17.0732	16.5144	19.435	18.4032	18.2975	20.1857	18.9556	27.8871	22.392	24.6482	22.2238	17.1972	16.7081	21.2218	15.7871	22.6127	22.2758	14.3101	35.7155	26.4315	17.0094	22.8309	16.546	16.9969	20.8856	16.0143	15.4964	14.1261	14.1595	18.1825		20.3528	20.8693	24.6624	20.8531	15.5524	20.2631	21.3101	19.8218	15.7265	17.255	17.9654	17.8276	16.503	23.0923
ZC3H13	0.495657	7.47897	7.75624	7.40357	7.17938	8.85771	7.68465	8.44167	10.3871	5.43014	7.22461	7.20143	5.21552	11.2858	4.16263	7.93327	10.6903	10.9408	15.2915	10.1768	2.89335	7.17266	8.63558	2.92521	8.3784	2.16646	5.8603	8.96097	10.6098	5.27214	8.94297	4.38573	6.28653	4.85488		4.92767	4.94489	5.3322	10.3436	8.85694	11.1885	10.4648	7.75219	7.93975	14.2971	10.1188	11.3015	13.4597	10.1039
METTL16	0.000383066	5.09049	5.10822	5.09361	4.54827	5.31222	4.13081	5.07278	5.73933	5.05734	5.43411	4.813	4.19507	5.46989	4.13885	5.26156	8.01706	5.346	6.22396	5.18783	4.52009	6.45004	4.86332	9.00406	4.23504	4.67758	4.18437	4.11632	5.04208	4.66829	4.55954	4.7712	3.91729	3.43682		4.2502	4.63234	5.96537	5.20996	4.58309	5.21037	6.12331	5.38906	5.29746	3.75315	5.63262	5.38521	5.38452	5.10547
TRA2A	0.470355	22.1393	21.2601	22.0357	22.0423	23.4282	28.886	27.4428	19.6828	19.0757	26.7009	14.1943	27.6065	24.1648	18.3786	20.872	23.4513	18.4225	18.6122	20.2002	19.7589	18.324	26.2201	20.1566	23.8817	20.9498	23.7235	25.0656	22.7299	19.3572	18.5209	21.5889	27.4818	24.4493		18.5331	19.0705	18.0332	26.0939	28.1045	24.0332	20.2616	20.3193	15.006	25.1516	21.7042	17.9139	17.5723	15.5147
CAPRIN1	0.0360998	31.929	31.5855	33.414	34.2957	40.1054	23.7573	30.975	36.2167	45.5599	19.1985	27.2739	24.2824	45.3365	29.2421	42.9578	62.5309	49.5585	45.2512	34.6751	18.3335	30.8688	31.3994	27.0069	34.7855	14.2533	21.6273	33.8437	29.0702	33.838	24.106	25.9305	22.4803	29.6532		27.0554	38.192	40.1103	26.643	41.6888	37.1662	41.6799	35.6951	31.7352	46.7921	47.1628	41.2392	43.4276	32.6936
ALKBH5	0.133639	38.7295	39.9675	39.928	38.0372	41.8927	37.6696	34.2093	37.1937	49.5374	42.5291	38.23	45.6623	45.1586	43.1777	37.5057	47.7669	40.8905	38.9602	38.1132	36.7095	36.8877	37.6675	35.7649	37.1821	28.1764	35.906	36.6466	37.2989	46.2298	39.4575	31.7296	36.9424	31.2234		37.1446	45.2807	40.3485	39.3934	49.0024	37.6516	34.3382	40.0324	50.4964	26.5817	44.1554	34.88	34.9473	45.533
FTO	0.874816	2.14865	2.10065	2.08596	2.06137	2.23628	1.7273	2.20591	2.82622	3.04167	2.4081	2.04878	1.71106	2.40803	2.41515	3.57057	4.27102	2.5774	2.68378	2.1355	0.949349	1.7397	2.24644	1.24576	2.1637	0.742367	1.55317	2.32416	2.52062	2.32365	2.23219	0.988573	1.75277	1.34916		1.52987	2.38935	2.50048	2.62257	2.52996	2.37672	1.93704	2.27126	2.7137	2.61275	2.76186	3.10851	2.77033	2.56069
EIF3A	0.884065	42.914	41.5905	41.9539	40.5268	43.6525	31.5024	41.9271	44.852	48.0075	29.5028	37.2283	23.47	59.5422	34.3781	53.8964	82.3493	65.4141	57.6427	43.5666	18.5407	39.3827	56.4545	29.0011	60.257	11.2473	25.6457	38.5115	33.453	56.9688	41.2076	64.9766	25.9694	46.6977		31.0073	44.1815	39.9029	36.1203	45.5792	50.7533	50.4062	42.8453	32.2344	56.2523	60.0264	54.5552	49.2829	46.4955
EIF3B	0.991163	30.9281	30.7343	31.004	30.7679	29.7521	20.5278	27.3695	20.1552	32.712	18.725	24.6236	26.961	33.0487	25.4139	19.6598	32.406	31.5791	20.842	26.8608	42.628	36.1216	32.216	58.1868	28.4677	99.9914	33.2127	15.4669	18.2847	31.6938	19.5205	47.5	19.9385	21.874		26.5051	27.4908	28.0109	17.1652	28.6384	24.6163	37.576	29.6732	20.7267	26.6694	27.3316	20.753	20.0041	19.3267
EIF3C	0.421541	1.08521	1.03366	1.06626	1.10438	1.20805	0.706749	1.17648	1.57246	2.40911	0.860764	0.771962	0.567432	1.78019	1.27527	1.19249	1.24633	1.10664	0.888976	1.8865	0.489041	0.960258	1.27719	0.894486	1.29625	0.329972	0.615666	1.15426	0.65741	1.15846	1.01516	1.14516	0.865568	1.08561		0.901491	0.983199	1.49471	1.21133	1.16649	1.49789	1.61163	0.838197	1.56242	0.889764	2.46319	1.56238	0.666876	1.07703
EIF3D	0.36444	70.8226	70.9862	69.1857	67.145	66.4813	51.8207	80.8579	61.2504	88.4275	65.2194	63.4776	84.8756	75.2516	52.0738	41.5385	70.9783	73.7888	47.6268	74.3365	71.3707	88.2089	74.8839	126.249	73.3511	93.7301	83.2944	52.3341	50.7205	78.1339	58.3001	78.2049	50.2253	72.5028		48.7285	63.2343	83.3281	59.5975	48.5991	66.6798	70.6415	75.6074	60.3326	77.0688	82.5575	57.6694	67.6864	48.7981
EIF3E	0.177754	54.1935	57.2427	61.769	61.4222	74.0782	42.1632	68.8611	58.9492	57.9233	56.7059	45.2159	60.121	50.073	41.3264	34.9721	70.3936	73.566	44.4859	58.1177	44.3259	85.8801	49.996	76.3697	49.6522	42.6766	52.7223	38.6019	43.1025	98.9926	40.6641	42.6498	44.6196	44.2915		41.309	45.1057	95.7654	57.5995	28.911	57.1797	59.2448	104.936	47.3964	65.1177	79.5891	54.1246	59.9731	36.817
EIF3F	0.698018	19.8615	20.2365	20.2274	20.1445	17.9772	18.2244	24.2154	14.281	20.7239	19.4036	17.5484	24.995	16.7693	9.50823	11.9364	19.2212	18.8786	12.2324	15.7514	31.1018	20.1881	14.1129	44.0202	16.6259	31.8047	20.0549	16.0514	18.8421	22.9129	17.9603	23.3845	18.7697	16.6034		15.2797	15.8558	26.3733	19.0236	14.7211	17.0532	14.8262	17.4563	17.7765	17.6417	21.2372	14.8476	17.8603	14.8676
EIF3G	0.441617	58.307	56.378	53.5025	52.4029	45.3634	43.2433	58.2923	34.3917	44.8191	50.043	55.8371	70.0382	50.615	45.4895	28.1935	42.988	48.3902	29.6376	45.5588	94.4464	64.8297	45.5211	129.244	55.5159	148.287	66.5596	40.4863	41.5133	60.9253	54.5391	76.1568	47.65	59.3838		48.3367	35.8984	47.034	36.2393	37.4549	35.4756	37.7099	45.1076	46.1997	37.4466	39.2526	28.3265	30.3397	36.3063
EIF3H	0.000262171	35.9283	38.4215	42.849	44.9022	46.8576	28.2437	41.4393	31.2987	39.0312	32.8423	33.4342	36.9745	32.4449	28.533	22.3257	46.1326	38.6439	25.0687	33.1063	38.8503	44.9145	28.6201	61.2156	30.2314	37.2399	32.5682	26.0794	29.0303	66.5044	30.8924	43.6687	28.7386	37.9204		27.6478	30.7909	49.535	37.006	23.9799	33.6111	46.7008	57.5772	38.9149	38.527	45.6845	31.6062	32.6479	25.9109
EIF3I	0.655337	165.456	168.895	171.82	161.677	153.836	161.711	237.85	126.387	151.956	88.8005	126.01	223.576	184.831	156.138	102.994	188.88	156.609	134.478	186.72	196.481	181.865	178.109	206.288	199.183	308.183	189.919	107.422	90.8389	185.902	117.664	159.379	150.508	134.097		123.303	149.643	178.283	91.2093	167.332	125.365	132.193	213.595	113.576	161.322	169.619	123.782	117.828	108.019
EIF3J	0.0987709	21.4508	21.8618	23.4433	21.6685	23.0059	18.2289	24.7633	23.8406	22.7628	11.4331	18.3751	26.2302	27.8707	20.4717	20.6589	30.1727	31.7071	22.2489	26.8483	14.6692	18.6256	27.3968	21.7497	28.8856	10.5158	16.7798	20.3357	16.7918	25.3065	14.4764	20.0281	17.7717	21.678		20.2876	23.466	27.7557	18.3631	21.9818	24.2106	28.5824	32.9004	15.7388	28.8501	30.9671	27.9257	19.7304	18.0542
EIF3K	0.431295	63.1359	64.1407	62.5713	60.3701	48.8688	50.9537	55.1211	40.3912	54.7423	52.6825	56.5094	89.8464	51.0183	43.4553	30.8575	48.3181	54.027	33.0476	57.6166	123.281	65.7814	43.7675	155.589	53.7215	166.932	65.1203	39.7944	49.1218	66.2669	50.8075	68.2091	49.7692	51.0568		56.1567	47.07	57.657	52.0199	49.8626	42.9842	39.842	54.2947	49.3947	51.2087	59.2244	38.2412	45.8358	37.6482
EIF3L	0.912454	54.8252	54.965	54.4247	53.987	48.615	30.4253	62.6437	61.042	80.0257	62.6627	55.7352	32.3634	58.1345	41.6301	51.0348	98.4129	71.9665	58.3093	66.0882	28.7151	67.9905	58.3238	58.5134	48.9577	11.7982	49.1362	51.3275	44.7267	69.9499	56.4846	63.0127	38.3955	57.2995		34.8009	51.8763	88.0478	64.2991	51.1897	71.6924	54.5475	83.9904	63.8829	81.7959	92.0803	61.6394	73.7004	55.7197
EIF3M	0.966242	20.5544	21.0088	20.9585	20.3275	19.9306	16.3927	22.7006	18.0892	20.8323	16.4945	18.3791	25.6334	20.0753	14.6978	12.2487	22.0957	23.2428	13.3137	21.2188	23.6952	22.5914	17.4091	39.3673	22.9876	36.1336	21.4216	15.0397	16.3125	24.2291	14.6031	23.1461	15.8674	17.3044		16.4142	18.1937	29.0981	19.6109	12.0595	17.7808	24.0111	24.1496	15.6167	20.6333	23.7127	17.8349	17.9833	13.4194
FMR1	0.000171498	4.17675	4.1452	4.4967	4.57375	5.73751	4.56115	4.5189	4.57915	3.53608	5.26426	3.32944	3.9741	4.57628	4.1806	4.9361	5.07876	4.10562	4.29876	3.36999	2.77179	4.1646	4.31967	2.77807	4.81718	2.04495	3.37912	5.69984	5.89047	4.78167	4.12245	3.09765	4.38326	4.38913		4.54733	4.47133	4.25378	6.1388	3.55506	4.99907	5.83608	4.23045	4.09033	5.6645	5.07406	5.0348	5.1853	4.12695
HNRNPA2B1	4.03704e-05	72.0341	71.745	77.1606	79.8947	90.2512	88.1248	98.0722	64.4918	73.3332	55.6082	59.5255	69.8793	92.1617	83.1216	61.2058	77.3045	58.4662	64.6441	72.2728	56.9234	71.9761	75.8022	83.1839	87.2484	35.8585	66.3526	64.3761	64.178	79.8323	61.5137	82.0756	77.4133	92.0091		83.4091	62.9827	65.2789	68.1916	68.8091	74.503	72.863	55.4547	53.7287	85.3177	74.3045	66.1553	54.2481	58.7914
HNRNPC	0.00310683	54.9888	54.3285	58.1617	58.1974	67.2152	53.7378	61.5265	50.7152	63.6012	42.7476	45.7297	57.9881	65.5907	52.9108	55.4345	69.5796	54.7192	48.9546	58.5434	50.383	68.3085	56.8826	74.4068	56.8808	39.0203	44.5485	53.2223	49.2992	65.9431	46.3354	38.5767	49.5802	64.5198		58.4993	53.1795	55.9014	50.2909	59.1085	57.3551	51.8692	45.412	44.1097	71.0114	59.8101	49.3194	49.4317	40.6128
IGF2BP2	0.00193622	0.263081	0.433115	0.397611	0.544075	0.718423	0.0342487	0.078643	0.345402	0.194869	0.639578	0.673613	0.0948269	0.206964	0.0378108	0.450782	0.0827179	0.514332	0.159984	0.0976051	0.257829	0.403081	0.2403	0.0812407	0.244233	0.155429	0.326411	0.414744	0.532952	0.26089	0.263659	0.182842	0.223537	0.167746		0.468878	1.42328	0.218107	0.755686	0.0918932	0.160858	0.458043	0.126361	0.283553	0.252308	0.0623743	0.176292	0.667451	0.620504
LRPPRC	0.0322795	14.8494	15.4676	16.1038	16.3904	21.7027	9.41388	15.2343	16.7523	18.3282	12.6183	13.7955	11.8421	18.0716	14.3496	13.7276	27.5414	24.5324	18.2121	16.4364	10.2979	24.439	13.0732	13.2777	14.4298	8.02575	11.4437	14.5536	12.9931	16.4419	11.8071	11.5186	9.71655	12.9094		11.6316	14.0633	24.7157	14.6919	15.3669	19.867	24.253	20.6112	11.3673	23.1918	26.6432	22.2642	21.3096	14.8612
PRRC2A	0.556093	54.8876	52.3443	52.3626	53.3735	61.8408	51.6608	51.6886	52.3727	96.6473	38.5248	51.5586	40.6598	78.491	58.1996	77.3795	76.5628	56.5061	64.2811	61.3382	28.5408	44.9892	65.7184	36.6465	50.5919	29.274	49.3266	62.7179	41.3756	54.2101	58.4173	54.9526	38.3726	65.8478		35.4156	72.5198	53.8775	37.5283	71.0423	63.9552	76.3735	61.7353	54.3221	66.9988	62.5853	51.6568	51.6458	58.2931
PRRC2C	0.130186	10.6224	11.4085	11.0954	10.6645	14.666	9.44292	7.72287	14.0332	10.7431	11.2038	9.64442	5.41547	14.9166	5.03429	15.6992	22.3206	18.1473	18.7406	11.8392	3.8008	9.00001	13.8718	5.47457	9.88895	5.08655	5.9483	12.6495	9.55311	9.75773	9.69643	9.43046	7.33797	11.0274		8.42172	9.62504	8.26459	15.5568	10.1649	14.0531	16.5394	13.625	12.2744	16.7986	14.744	15.629	12.3732	15.3722
RBMX	0.000206639	27.1964	26.6153	28.5976	29.4554	31.3534	24.7658	35.9661	26.654	32.7702	26.8325	21.7338	27.2832	23.9717	30.115	21.5123	32.8567	22.3282	21.8544	29.2316	21.5789	32.4978	27.6846	40.1163	28.5038	20.9767	25.2948	29.5411	24.9848	33.0725	22.0119	24.247	25.8543	27.2579		22.5845	21.0011	39.2412	32.465	27.1275	31.7576	31.8361	27.1275	22.061	33.6076	32.4365	24.7609	29.2765	24.6626
YTHDC1	0.0716162	12.4529	12.2669	12.7431	12.6641	14.1227	13.1647	14.6528	11.6762	12.274	17.7639	12.0647	11.1853	13.3181	11.7879	11.8401	15.363	11.7576	12.7099	12.8675	7.09357	14.03	12.9784	11.359	12.4664	8.02683	10.962	12.9833	13.5407	12.0711	12.3358	12.3189	12.7553	13.3348		11.2683	10.412	12.7345	16.0285	12.2103	14.6641	13.6142	10.8377	11.7601	17.4422	13.9633	12.8149	12.0419	12.1152
YTHDC2	0.099682	3.44943	3.42955	3.54677	3.48793	4.81641	3.45274	3.90051	3.85023	3.30468	3.37728	2.44587	2.9865	4.23725	2.80292	4.49217	7.64546	4.07561	4.03055	4.03181	1.16928	3.82329	4.79752	2.13601	4.36512	0.976273	2.85344	3.75122	3.04595	2.92871	2.99172	1.70447	2.76216	4.64533		2.63458	3.1734	3.14087	3.9849	3.29154	4.21167	5.17344	4.90427	3.00441	6.23211	5.69437	4.57271	3.60671	3.75836
YTHDF1	0.0452606	20.0761	20.5934	21.5241	21.4007	24.052	21.7491	16.1712	18.0655	20.9825	19.024	16.6638	20.9952	20.9047	18.0028	21.1455	25.6907	17.9027	20.1169	17.8508	16.5789	17.1083	31.8558	20.1465	22.5202	25.0673	18.5747	21.3159	18.7808	21.8476	19.5137	18.1045	16.3736	19.0776		16.3843	22.8102	18.6149	21.527	28.0964	21.8224	21.504	27.2503	17.391	24.4654	23.0765	19.7071	20.8509	18.0253
YTHDF2	0.04952	17.05	17.3752	17.8104	17.2901	20.6008	14.468	14.883	18.2238	20.2847	15.1234	15.3813	18.2674	19.7865	15.0471	16.264	23.1409	20.163	16.3342	15.6118	14.6364	15.909	26.3238	14.9055	19.6482	14.6433	17.76	17.7344	15.5811	17.4233	13.3422	15.8363	14.2405	16.4366		15.4742	18.3136	17.3177	19.5561	21.0039	18.5114	22.6527	22.307	15.5124	19.772	21.4529	18.0029	19.9302	15.6052
YTHDF3	0.0162783	14.0144	14.5464	15.7755	14.6824	19.0559	11.559	13.9786	17.7233	17.5463	10.3724	9.51763	13.101	16.4177	11.1435	21.1977	26.2524	19.7608	22.89	12.6679	9.08422	11.1526	17.2299	9.53875	13.1473	6.36016	11.003	13.7348	15.3823	13.4343	12.4645	10.1846	10.9915	14.567		10.8182	20.157	16.7129	15.6879	18.5156	17.7798	21.5619	28.8425	14.7578	21.6721	16.3524	22.6346	23.808	15.432
[truncated: 456 more columns]

## Sheet: N Stage
Excel S4 Expression Variations of the mRNA m6A Regulator Genes between Prostate Cancer N Stages
m6A Regulator	p-Value of Expression Variations between N Stages	Mean FPKM Value in N0	Mean FPKM Value in N1	FPKM Values in N0 Tumors
				TCGA-2A-A8VL-01A-21R-A37L-07	TCGA-2A-A8VO-01A-11R-A37L-07	TCGA-2A-A8VV-01A-11R-A37L-07	TCGA-2A-A8VX-01A-11R-A37L-07	TCGA-2A-A8W1-01A-11R-A37L-07	TCGA-2A-A8W3-01A-11R-A37L-07	TCGA-2A-AAYF-01A-11R-A41O-07	TCGA-2A-AAYO-01A-11R-A41O-07	TCGA-2A-AAYU-01A-11R-A41O-07	TCGA-4L-AA1F-01A-11R-A41O-07	TCGA-CH-5737-01A-11R-1580-07	TCGA-CH-5738-01A-11R-1580-07	TCGA-CH-5739-01A-11R-1580-07	TCGA-CH-5740-01A-11R-1580-07	TCGA-CH-5743-01A-21R-1580-07	TCGA-CH-5744-01A-11R-1580-07	TCGA-CH-5745-01A-11R-1580-07	TCGA-CH-5746-01A-11R-1580-07	TCGA-CH-5748-01A-11R-1580-07	TCGA-CH-5750-01A-11R-1580-07	TCGA-CH-5752-01A-11R-1580-07	TCGA-CH-5761-01A-11R-1580-07	TCGA-CH-5762-01A-11R-1580-07	TCGA-CH-5763-01A-11R-1580-07	TCGA-CH-5764-01A-21R-1580-07	TCGA-CH-5765-01A-11R-1580-07	TCGA-CH-5767-01A-11R-1789-07	TCGA-CH-5768-01A-11R-1580-07	TCGA-CH-5769-01A-11R-1580-07	TCGA-CH-5771-01A-21R-1580-07	TCGA-CH-5772-01A-11R-1580-07	TCGA-CH-5789-01A-11R-1580-07	TCGA-CH-5790-01A-11R-1580-07	TCGA-CH-5791-01A-11R-1580-07	TCGA-CH-5792-01A-11R-1580-07	TCGA-CH-5794-01A-11R-1580-07	TCGA-EJ-5494-01A-01R-1580-07	TCGA-EJ-5496-01A-01R-1580-07	TCGA-EJ-5497-01A-02R-1580-07	TCGA-EJ-5498-01A-01R-1580-07	TCGA-EJ-5499-01A-01R-1580-07	TCGA-EJ-5501-01A-01R-1580-07	TCGA-EJ-5502-01A-01R-1580-07	TCGA-EJ-5503-01A-01R-1580-07	TCGA-EJ-5505-01A-01R-1580-07	TCGA-EJ-5508-01A-02R-1580-07
METTL3	0.849915	8.7481	8.78257	9.94827	10.7275	11.859	14.8449	13.4126	7.94259	9.70844	8.99367	9.55206	5.14777	9.52128	8.22168	6.9295	8.77014	5.79492	8.75846	7.0794	9.54044	10.6292	8.36381	9.40751	9.96535	6.64039	6.28894	7.77489	8.31763	10.2147	9.3824	8.77088	5.86395	8.27791	6.76672	9.83743	4.9265	6.95417	8.12005	8.34586	7.09621	5.86138	4.82173	5.78582	6.33956	7.08689	6.29692	7.34793	6.4376
METTL14	0.895939	3.81218	3.77383	3.64619	3.64001	3.53369	3.00926	4.36497	4.52732	5.05859	4.08596	4.58136	3.46725	4.59188	4.53284	5.21072	4.80018	5.53984	4.27281	4.24992	4.75368	4.17494	4.63313	6.38803	4.58166	4.90631	4.24229	5.14122	5.84145	4.56127	5.38648	3.28388	4.33511	4.75692	5.02699	4.83613	5.84675	3.78421	4.2478	4.52321	6.05875	4.794	4.96774	5.33419	3.74061	3.35797	3.90685	5.38377	5.20362
CBLL1	0.20159	8.9873	8.44219	9.66656	8.06266	6.46621	9.75162	7.16058	9.60407	13.4694	8.13463	6.43327	3.98737	7.31524	6.41539	10.4755	6.76333	7.42124	5.65675	5.82868	7.8408	27.8732	14.3337	8.02101	12.0207	9.84844	8.14565	10.0247	9.59807	33.2433	10.7887	5.46481	12.5465	11.2305	6.96891	9.59057	10.9588	7.19594	3.3614	5.65232	12.2691	12.6303	8.42901	8.80496	5.32812	7.12046	10.5357	14.5809	10.6024
RBM15	0.124582	2.37991	2.50009	1.79084	2.12676	1.65573	2.41003	2.76142	2.54753	2.445	2.12707	2.38687	2.27353	2.89002	2.40931	4.03123	2.16487	3.43209	2.46309	2.56347	2.87616	2.55101	3.66071	4.18589	2.33588	4.05753	2.31739	2.41901	2.6447	2.85466	3.5453	2.11048	2.14053	2.4534	3.55024	2.42745	3.49825	2.21002	3.09328	2.17275	2.71943	2.90462	2.99109	2.47005	2.28083	2.25259	2.39	2.50013	2.2682
RBM15B	0.14619	15.2201	15.8695	13.1235	9.91696	14.9745	13.5722	13.7139	21.2948	12.3438	10.9667	20.9092	14.2838	19.559	14.2791	15.0331	15.0517	14.3049	22.4883	12.8334	16.5464	13.867	17.2512	18.5127	26.5408	16.8065	12.0006	19.9494	19.4693	15.3527	20.6847	15.266	19.099	14.6588	13.1555	19.3966	30.1066	14.7266	27.7539	14.4569	20.1427	15.6176	14.7707	22.3869	17.4374	14.7096	15.6122	15.7303	14.2939
VIRMA	0.00448337	5.44525	6.06628	3.70591	3.86131	4.83194	5.79734	6.88998	5.18034	5.32874	4.02469	5.22886	5.58525	5.44644	5.48736	10.8146	5.96987	5.9838	4.89423	5.1873	5.95769	6.95404	8.19174	7.4191	8.53798	8.91463	5.39137	8.31735	8.44888	8.11361	7.18219	4.67843	5.80508	5.31862	5.53898	7.22682	7.52207	5.87638	5.35901	6.63728	7.6439	6.63498	7.03077	7.46274	4.07909	5.88474	5.13491	6.3129	7.56965
WTAP	0.000118062	18.9679	16.6777	19.435	18.1759	18.4032	32.5289	21.0719	15.9601	37.3312	20.3528	15.6948	12.6107	20.8693	18.2975	17.9888	24.6624	20.8531	15.5524	16.7362	20.2631	19.1779	21.3101	16.9108	17.7411	16.9411	14.9857	19.774	21.9272	19.8218	18.5903	21.2362	15.7265	20.1851	21.1579	17.255	24.3445	17.2816	20.1857	20.4113	17.9654	17.8276	16.503	19.2504	17.5978	23.0923	17.1313	31.7159	18.0956
ZC3H13	0.765599	7.51838	7.39993	7.68465	7.54753	8.44167	7.41121	9.92945	9.50603	5.67845	4.92767	10.6717	7.61402	4.94489	10.3871	8.18984	5.3322	10.3436	8.85694	9.6401	11.1885	8.57714	10.4648	7.80828	14.0445	9.15993	12.1298	9.16609	8.11525	7.75219	7.25734	9.62649	7.93975	9.6634	12.1382	14.2971	15.288	7.8272	5.43014	11.2247	10.1188	11.3015	13.4597	7.89661	10.7652	10.1039	10.5237	11.9206	14.8405
METTL16	0.00397189	5.01749	4.63704	4.13081	3.84465	5.07278	3.2206	4.40118	5.06209	4.19515	4.2502	5.09257	3.21612	4.63234	5.73933	6.7019	5.96537	5.20996	4.58309	5.80011	5.21037	5.41854	6.12331	6.29628	3.99775	5.79547	5.85416	4.58319	5.5105	5.38906	6.16668	5.48247	5.29746	6.38211	4.98636	3.75315	7.75706	4.70814	5.05734	6.04795	5.63262	5.38521	5.38452	4.97793	4.61118	5.10547	5.49574	4.80236	6.21132
TRA2A	0.0317629	21.6136	22.9309	28.886	25.0617	27.4428	31.642	27.0099	22.7991	16.256	18.5331	21.956	21.4192	19.0705	19.6828	18.0595	18.0332	26.0939	28.1045	15.3564	24.0332	22.1476	20.2616	23.8471	17.8693	23.2972	17.5134	18.7975	19.5821	20.3193	24.7614	30.1842	15.006	24.5163	20.9798	25.1516	30.8092	14.4787	19.0757	15.2743	21.7042	17.9139	17.5723	18.2023	16.6861	15.5147	14.9938	17.4587	20.4205
CAPRIN1	0.323692	32.9292	34.156	23.7573	23.8506	30.975	23.2272	38.4328	43.8746	32.9704	27.0554	37.2868	40.642	38.192	36.2167	43.5099	40.1103	26.643	41.6888	29.6183	37.1662	46.5651	41.6799	65.2591	59.1583	41.1739	33.6008	47.3614	51.8986	35.6951	50.1687	48.1031	31.7352	42.5379	36.3662	46.7921	46.8072	35.7117	45.5599	44.1554	47.1628	41.2392	43.4276	55.9485	46.294	32.6936	29.5139	43.4916	42.8852
ALKBH5	0.331381	39.4869	39.0348	37.6696	34.0351	34.2093	33.7611	40.9216	38.1949	39.5437	37.1446	46.8776	24.094	45.2807	37.1937	40.8752	40.3485	39.3934	49.0024	46.9372	37.6516	35.8635	34.3382	37.6941	50.8123	39.2787	36.8215	27.0599	39.4623	40.0324	36.8994	36.7941	50.4964	35.4947	41.6957	26.5817	55.1756	40.7047	49.5374	36.0954	44.1554	34.88	34.9473	46.551	46.6037	45.533	45.4849	42.4545	33.9133
FTO	0.446127	2.10494	2.01855	1.7273	1.52367	2.20591	1.19716	1.91886	2.19542	1.96714	1.52987	2.44795	2.38526	2.38935	2.82622	2.21944	2.50048	2.62257	2.52996	2.3074	2.37672	2.32802	1.93704	5.96926	3.49124	2.29021	2.79913	1.76779	2.9127	2.27126	2.29949	2.27205	2.7137	2.68678	2.53039	2.61275	1.67951	2.68884	3.04167	3.69314	2.76186	3.10851	2.77033	3.11463	3.185	2.56069	2.98137	2.91732	2.80586
EIF3A	0.456748	41.7672	40.3631	31.5024	35.6121	41.9271	28.9272	52.258	62.9763	51.9274	31.0073	47.431	35.4291	44.1815	44.852	60.995	39.9029	36.1203	45.5792	33.5804	50.7533	62.7586	50.4062	73.1669	37.5816	51.8674	44.1786	61.6107	56.822	42.8453	67.047	52.3904	32.2344	51.2255	51.1256	56.2523	64.434	52.7657	48.0075	51.0173	60.0264	54.5552	49.2829	55.6322	52.2549	46.4955	42.6643	56.6042	57.0436
EIF3B	0.795574	30.7715	31.0631	20.5278	28.8827	27.3695	26.0813	25.6487	32.6492	31.1986	26.5051	27.1995	18.2271	27.4908	20.1552	26.45	28.0109	17.1652	28.6384	23.9385	24.6163	27.6776	37.576	31.5128	19.8002	26.0223	17.0227	26.5194	26.2558	29.6732	36.2508	33.022	20.7267	25.5477	18.5622	26.6694	25.7906	24.4651	32.712	32.6916	27.3316	20.753	20.0041	35.451	28.1335	19.3267	21.988	22.8014	22.6656
EIF3C	0.356418	1.06503	1.09756	0.706749	1.13039	1.17648	0.907159	1.36609	1.17	1.24213	0.901491	1.59359	0.502269	0.983199	1.57246	1.63985	1.49471	1.21133	1.16649	1.01431	1.49789	1.19168	1.61163	2.4455	0.779995	1.06905	1.11796	1.30084	1.85776	0.838197	1.49887	1.21259	1.56242	1.12887	0.941065	0.889764	1.39316	1.7691	2.40911	1.44222	2.46319	1.56238	0.666876	1.72677	1.68349	1.07703	0.938973	1.85861	0.847513
EIF3D	0.00105592	70.475	62.744	51.8207	63.68	80.8579	71.3081	61.1583	74.1632	58.0738	48.7285	67.0221	41.1155	63.2343	61.2504	73.8929	83.3281	59.5975	48.5991	60.2941	66.6798	68.8514	70.6415	82.6174	57.9431	62.4525	50.7808	85.4634	69.3595	75.6074	93.684	72.9266	60.3326	49.7457	41.764	77.0688	69.45	63.5086	88.4275	72.5925	82.5575	57.6694	67.6864	104.763	72.9874	48.7981	59.9613	66.6713	59.6373
EIF3E	0.0474777	60.9803	55.024	42.1632	52.6754	68.8611	68.7627	79.7945	64.2558	50.7765	41.309	46.4732	39.0884	45.1057	58.9492	93.5319	95.7654	57.5995	28.911	48.9788	57.1797	62.3097	59.2448	80.8128	49.9239	79.7051	51.6735	83.3367	69.3155	104.936	91.3243	73.7476	47.3964	69.0584	39.7769	65.1177	46.5663	29.9789	57.9233	59.6637	79.5891	54.1246	59.9731	83.2188	46.0933	36.817	37.3719	58.4377	63.5546
EIF3F	0.0918967	20.3304	19.073	18.2244	17.715	24.2154	19.7483	15.9211	20.378	16.8505	15.2797	18.3466	14.8819	15.8558	14.281	16.1763	26.3733	19.0236	14.7211	12.5553	17.0532	16.5659	14.8262	23.7523	11.2709	16.2959	14.218	23.3001	22.1389	17.4563	23.7564	21.2843	17.7765	16.9632	11.7764	17.6417	19.5597	15.3634	20.7239	19.0715	21.2372	14.8476	17.8603	27.59	19.7737	14.8676	16.2296	15.4787	14.4238
EIF3G	0.0505552	55.1458	49.3345	43.2433	67.9122	58.2923	63.9569	48.9428	60.8982	59.0765	48.3367	45.4564	32.5581	35.8984	34.3917	37.9698	47.034	36.2393	37.4549	37.9553	35.4756	37.8469	37.7099	38.5713	37.6803	31.4806	28.4595	40.6423	41.5223	45.1076	47.8275	43.5869	46.1997	34.7969	26.0798	37.4466	37.69	42.1501	44.8191	46.2117	39.2526	28.3265	30.3397	52.4655	50.3814	36.3063	42.9594	36.827	29.7379
EIF3H	0.705143	41.6317	41.6711	28.2437	33.2257	41.4393	60.6976	51.7533	38.6754	33.8845	27.6478	34.1902	36.6899	30.7909	31.2987	47.4081	49.535	37.006	23.9799	29.189	33.6111	35.7007	46.7008	44.3505	44.5362	41.1578	31.2349	50.6556	45.2888	57.5772	48.015	46.444	38.9149	35.8362	25.476	38.527	37.1315	30.9514	39.0312	34.3024	45.6845	31.6062	32.6479	52.3623	35.0216	25.9109	28.3217	34.7384	35.0679
EIF3I	0.0857635	169.195	157.42	161.711	156.554	237.85	190.658	199.281	138.018	145.989	123.303	143.58	89.5621	149.643	126.387	169.426	178.283	91.2093	167.332	127.693	125.365	153.691	132.193	170.17	128.79	109.888	112.468	155.454	143.277	213.595	166.734	172.114	113.576	151.316	98.1071	161.322	148.869	124.474	151.956	157.745	169.619	123.782	117.828	207.006	146.026	108.019	119.224	163.452	132.958
EIF3J	0.308598	22.4538	21.6172	18.2289	19.1975	24.7633	27.3262	34.788	33.9525	27.3147	20.2876	25.137	18.2469	23.466	23.8406	26.5828	27.7557	18.3631	21.9818	20.1179	24.2106	32.203	28.5824	33.2411	25.437	29.2378	21.0787	28.6151	31.9226	32.9004	40.0872	30.0718	15.7388	30.5415	24.4724	28.8501	28.6107	18.0992	22.7628	21.7296	30.9671	27.9257	19.7304	35.3425	22.3617	18.0542	14.3805	27.6882	24.4585
EIF3K	0.142845	63.0078	57.8818	50.9537	57.5237	55.1211	58.8221	89.918	49.1085	60.9788	56.1567	51.2833	49.7042	47.07	40.3912	43.2812	57.657	52.0199	49.8626	37.7484	42.9842	40.8677	39.842	53.1992	35.5599	38.4842	38.894	59.4887	51.7261	54.2947	59.4855	69.5024	49.3947	40.3713	35.968	51.2087	55.6434	46.8971	54.7423	47.0746	59.2244	38.2412	45.8358	76.3682	50.2036	37.6482	49.8474	49.3199	37.0743
EIF3L	0.0103032	55.3899	48.8743	30.4253	44.9378	62.6437	34.2442	71.3868	93.4451	49.8754	34.8009	58.8673	34.8079	51.8763	61.042	70.01	88.0478	64.2991	51.1897	59.4066	71.6924	64.3666	54.5475	114.416	39.85	53.0229	60.6436	101.104	84.5763	83.9904	100.847	79.6753	63.8829	44.2917	51.1652	81.7959	74.9137	70.4754	80.0257	83.0573	92.0803	61.6394	73.7004	91.2688	76.697	55.7197	66.5535	70.8834	75.3945
EIF3M	0.0199254	21.0619	19.1291	16.3927	22.4323	22.7006	30.2309	19.3888	23.0482	20.3793	16.4142	17.806	15.491	18.1937	18.0892	23.6742	29.0981	19.6109	12.0595	12.05	17.7808	21.4022	24.0111	23.0861	13.1812	20.3584	15.6432	25.2682	21.43	24.1496	28.2032	25.7083	15.6167	19.348	13.1298	20.6333	19.3629	14.0057	20.8323	18.423	23.7127	17.8349	17.9833	29.5501	16.4102	13.4194	13.0857	20.8836	19.6846
FMR1	0.000697419	4.33539	4.82916	4.56115	4.26539	4.5189	5.14525	4.87781	4.68688	4.34146	4.54733	4.75864	4.95286	4.47133	4.57915	5.37474	4.25378	6.1388	3.55506	4.95731	4.99907	4.87641	5.83608	6.24924	6.60982	4.98402	5.55749	4.86862	5.82106	4.23045	4.09247	4.19727	4.09033	6.51785	5.4564	5.6645	4.57274	4.43404	3.53608	4.22187	5.07406	5.0348	5.1853	5.81216	3.99823	4.12695	3.73235	5.5182	5.88751
HNRNPA2B1	0.00098781	75.0839	81.7228	88.1248	78.3117	98.0722	114.474	116.198	87.0915	86.3127	83.4091	91.302	76.849	62.9827	64.4918	57.86	65.2789	68.1916	68.8091	54.0561	74.503	74.458	72.863	83.4447	68.7193	70.6664	61.0014	65.1596	68.6404	55.4547	75.2626	84.8119	53.7287	99.2949	71.7508	85.3177	85.1612	62.5106	73.3332	81.7495	74.3045	66.1553	54.2481	75.9282	56.2787	58.7914	57.8879	82.3515	73.1199
HNRNPC	0.350103	56.776	57.8292	53.7378	53.5379	61.5265	76.9833	71.8868	68.3667	54.1882	58.4993	66.79	45.3634	53.1795	50.7152	55.5587	55.9014	50.2909	59.1085	39.7882	57.3551	54.3597	51.8692	66.7049	61.7266	50.3412	44.6213	55.39	69.6401	45.412	62.0555	61.4473	44.1097	77.9998	50.4738	71.0114	67.2286	49.4513	63.6012	73.8757	59.8101	49.3194	49.4317	82.2833	53.0587	40.6128	45.7778	66.4231	56.99
IGF2BP2	0.594134	0.437479	0.508844	0.0342487	0.206011	0.078643	0.0745903	0.123329	0.395813	0.133457	0.468878	0.0769036	0.982039	1.42328	0.345402	0.162524	0.218107	0.755686	0.0918932	0.360133	0.160858	0.183707	0.458043	0.156046	0.409253	0.760496	0.242892	0.301198	0.436552	0.126361	0.178023	0.496672	0.283553	2.08681	0.152641	0.252308	0.451089	0.543673	0.194869	0.668136	0.0623743	0.176292	0.667451	0.377896	0.749038	0.620504	0.592731	0.126261	0.429287
LRPPRC	0.908068	16.0733	15.8217	9.41388	11.8389	15.2343	14.8246	26.0171	27.0444	14.7666	11.6316	14.8242	13.884	14.0633	16.7523	25.7042	24.7157	14.6919	15.3669	7.97812	19.867	22.1862	24.253	28.6278	31.3224	18.1376	13.4586	29.6094	27.2327	20.6112	26.9496	23.7277	11.3673	21.548	13.5293	23.1918	21.9819	16.7415	18.3282	17.6875	26.6432	22.2642	21.3096	26.7899	17.7526	14.8612	12.5971	22.4355	23.6798
PRRC2A	0.353325	52.6893	54.6532	51.6608	36.1135	51.6886	41.1061	55.1369	90.0837	43.7098	35.4156	72.0353	36.8833	72.5198	52.3727	57.9477	53.8775	37.5283	71.0423	47.9993	63.9552	68.424	76.3735	73.1916	95.2064	57.0781	43.4191	65.1716	70.7563	61.7353	57.3748	46.045	54.3221	49.4398	53.7127	66.9988	64.5069	62.1979	96.6473	63.6382	62.5853	51.6568	51.6458	65.9	72.214	58.2931	56.9047	58.5539	55.721
PRRC2C	0.415691	11.1151	11.2964	9.44292	8.40087	7.72287	7.31971	10.7607	12.5495	11.9322	8.42172	10.4939	11.9683	9.62504	14.0332	15.1541	8.26459	15.5568	10.1649	11.3133	14.0531	14.148	16.5394	15.4562	22.7354	16.7107	13.6872	16.5265	15.704	13.625	15.1594	12.0556	12.2744	14.3585	17.6707	16.7986	15.2413	13.1934	10.7431	13.6705	14.744	15.629	12.3732	10.5363	12.0726	15.3722	13.8846	13.4102	17.5704
RBMX	0.066863	27.9648	29.1954	24.7658	24.5441	35.9661	40.4864	34.024	38.9351	21.5977	22.5845	31.4764	24.2992	21.0011	26.654	30.9656	39.2412	32.465	27.1275	24.9497	31.7576	29.0464	31.8361	42.4529	25.6401	29.0467	24.8737	40.1214	35.1482	27.1275	41.4079	36.0965	22.061	32.2379	23.8417	33.6076	30.8068	22.7982	32.7702	28.6404	32.4365	24.7609	29.2765	40.4269	24.6736	24.6626	21.374	29.6012	30.3684
YTHDC1	0.0957442	12.5004	13.0159	13.1647	12.4468	14.6528	14.418	13.7022	13.8359	12.8784	11.2683	13.4118	10.3845	10.412	11.6762	12.5557	12.7345	16.0285	12.2103	12.2584	14.6641	13.1901	13.6142	14.1255	13.8831	15.3127	12.5479	14.0314	16.4711	10.8377	15.0382	13.201	11.7601	15.0794	13.455	17.4422	16.5375	12.0858	12.274	15.0027	13.9633	12.8149	12.0419	14.7313	11.5648	12.1152	11.4387	14.3405	15.9176
YTHDC2	0.306994	3.4943	3.64142	3.45274	2.98437	3.90051	1.66753	5.26184	3.91571	3.48533	2.63458	3.5855	3.21003	3.1734	3.85023	5.79953	3.14087	3.9849	3.29154	3.4894	4.21167	4.72921	5.17344	8.7441	3.3253	4.50261	3.96918	4.90303	4.96096	4.90427	4.88339	3.80901	3.00441	5.00501	4.33742	6.23211	4.4966	3.14323	3.30468	3.55631	5.69437	4.57271	3.60671	3.79856	2.42466	3.75836	2.84531	4.98119	6.28528
YTHDF1	0.0118449	20.9647	22.226	21.7491	20.4973	16.1712	17.8608	25.2532	30.1407	23.0974	16.3843	21.6149	18.4768	22.8102	18.0655	23.904	18.6149	21.527	28.0964	20.0307	21.8224	20.9779	21.504	28.6167	30.3236	27.0016	19.6879	23.7169	21.8803	27.2503	20.2022	19.1385	17.391	20.9884	23.0164	24.4654	30.3851	21.0202	20.9825	21.8734	23.0765	19.7071	20.8509	27.6976	23.3	18.0253	21.3015	25.2064	19.609
YTHDF2	0.244946	17.4664	18.0111	14.468	15.7028	14.883	17.9628	21.4062	16.4281	18.4589	15.4742	18.4895	13.6512	18.3136	18.2238	20.5594	17.3177	19.5561	21.0039	12.49	18.5114	18.905	22.6527	31.7255	24.6056	20.6648	16.8216	19.9471	18.8951	22.307	20.879	17.1357	15.5124	20.7631	18.8256	19.772	26.9788	14.9421	20.2847	18.4256	21.4529	18.0029	19.9302	27.7217	18.1782	15.6052	16.5	20.6184	18.5118
YTHDF3	0.126185	14.9012	15.8917	11.559	12.1826	13.9786	15.8321	25.2793	18.9336	14.4857	10.8182	15.4638	11.2483	20.157	17.7233	29.0146	16.7129	15.6879	18.5156	14.2749	17.7798	21.6621	21.5619	15.7732	13.6667	19.9706	16.991	21.5454	24.5904	28.8425	17.8322	15.1491	14.7578	21.4104	23.7106	21.6721	21.6091	15.5737	17.5463	18.4109	16.3524	22.6346	23.808	19.3482	16.4824	15.432	15.5589	21.715	21.1853
[truncated: 452 more columns]
