# Supplementary material for: Systematic Investigation of mRNA N6-Methyladenosine Machinery in Primary Prostate Cancer
Source: Dis Markers. 2020 Nov 12;2020:8833438. doi: 10.1155/2020/8833438 (PMC7676945; doi:10.1155/2020/8833438)
Supplement: Supplementary Materials — include a word file, six figures, and nine spreadsheets. The supplementary materials.docx includes four tables and provides a description for each supplementary material file. [file 8833438.f1.zip › 8833438.f1/Excel S5.xlsx]

## Sheet: Sheet1
Excel S5 Expression Variations of the mRNA m6A Regulator Genes among Molecular Subtypes of Prostate Cancer
m6A Regulator	p-Value of Expression Variations between Molecular Subtypes	Mean FPKM Value in ERG Tumors	Mean FPKM Value in ETV1 Tumors	Mean FPKM Value in ETV4 Tumors	Mean FPKM Value in FLI1 Tumors	Mean FPKM Value in SPOP Tumors	Mean FPKM Value in FOXA1 Tumors	Mean FPKM Value in IDH1 Tumors	Mean FPKM Value in Other Tumors	FPKM Values in ERG Tumors
										TCGA-2A-A8VL-01A-21R-A37L-07	TCGA-2A-A8VT-01A-11R-A37L-07	TCGA-2A-A8VV-01A-11R-A37L-07	TCGA-CH-5739-01A-11R-1580-07	TCGA-CH-5740-01A-11R-1580-07	TCGA-CH-5741-01A-11R-1580-07	TCGA-CH-5743-01A-21R-1580-07	TCGA-CH-5744-01A-11R-1580-07	TCGA-CH-5746-01A-11R-1580-07	TCGA-CH-5752-01A-11R-1580-07	TCGA-CH-5754-01A-11R-1580-07	TCGA-CH-5764-01A-21R-1580-07	TCGA-CH-5765-01A-11R-1580-07	TCGA-CH-5766-01A-11R-1580-07	TCGA-CH-5768-01A-11R-1580-07	TCGA-CH-5769-01A-11R-1580-07	TCGA-CH-5789-01A-11R-1580-07	TCGA-CH-5790-01A-11R-1580-07	TCGA-CH-5791-01A-11R-1580-07	TCGA-CH-5794-01A-11R-1580-07	TCGA-EJ-5495-01A-01R-1580-07	TCGA-EJ-5496-01A-01R-1580-07	TCGA-EJ-5497-01A-02R-1580-07	TCGA-EJ-5498-01A-01R-1580-07	TCGA-EJ-5499-01A-01R-1580-07	TCGA-EJ-5502-01A-01R-1580-07	TCGA-EJ-5503-01A-01R-1580-07	TCGA-EJ-5506-01A-01R-1580-07	TCGA-EJ-5507-01A-01R-1580-07	TCGA-EJ-5508-01A-02R-1580-07	TCGA-EJ-5512-01A-01R-1580-07	TCGA-EJ-5516-01A-01R-1580-07	TCGA-EJ-5521-01A-01R-1580-07	TCGA-EJ-5522-01A-01R-1580-07	TCGA-EJ-5524-01A-01R-1580-07	TCGA-EJ-5525-01A-01R-1580-07	TCGA-EJ-5526-01A-01R-1580-07	TCGA-EJ-5527-01A-01R-1580-07	TCGA-EJ-5530-01A-01R-1580-07	TCGA-EJ-5542-01A-01R-1580-07
METTL3	0.000196994	8.4234	9.37982	9.66006	7.90977	10.4998	9.53463	6.78166	8.88725	9.94827	5.65939	11.859	6.9295	8.77014	6.80362	5.79492	8.75846	9.54044	9.40751	9.18567	7.77489	8.31763	7.0729	9.3824	8.77088	6.76672	9.83743	4.9265	8.12005	5.30976	7.09621	5.86138	4.82173	5.78582	7.08689	6.29692	6.9697	8.04328	6.4376	6.83378	5.01002	5.60122	8.39427	6.50909	8.14874	6.67807	6.07297	8.27347	6.69523
METTL14	4.27393e-05	4.24259	4.04622	4.1651	4.53667	3.54111	3.84769	4.33679	3.9227	3.64619	4.19374	3.53369	5.21072	4.80018	4.91067	5.53984	4.27281	4.75368	6.38803	3.26697	5.14122	5.84145	4.50364	5.38648	3.28388	5.02699	4.83613	5.84675	4.2478	4.83254	6.05875	4.794	4.96774	5.33419	3.35797	3.90685	5.00448	5.49478	5.20362	5.01505	6.5212	4.6575	5.48514	5.927	4.08636	4.7224	5.56365	4.62593	6.20031
CBLL1	1.15897e-09	7.52016	8.58761	8.00018	7.67652	12.9256	12.3354	14.6321	11.7121	9.66656	8.12279	6.46621	10.4755	6.76333	6.06179	7.42124	5.65675	7.8408	8.02101	6.96541	10.0247	9.59807	7.72225	10.7887	5.46481	6.96891	9.59057	10.9588	3.3614	9.43427	12.2691	12.6303	8.42901	8.80496	7.12046	10.5357	10.1041	8.47407	10.6024	8.26788	9.81677	4.99876	11.2784	8.65389	13.9891	11.3757	8.68853	7.91207	11.6048
RBM15	0.628128	2.35178	2.51419	2.58881	2.57797	2.39345	2.74527	2.29348	2.40345	1.79084	2.62205	1.65573	4.03123	2.16487	2.27596	3.43209	2.46309	2.87616	4.18589	2.7769	2.41901	2.6447	3.94521	3.5453	2.11048	3.55024	2.42745	3.49825	3.09328	3.08499	2.71943	2.90462	2.99109	2.47005	2.25259	2.39	2.06364	2.44511	2.2682	2.61914	2.52837	1.99683	2.67956	2.43551	2.71937	1.95972	3.00429	2.53666	2.24331
RBM15B	1.33612e-08	16.8555	16.111	17.506	12.8942	14.5803	14.7043	13.8708	13.7085	13.1235	17.563	14.9745	15.0331	15.0517	20.569	14.3049	22.4883	16.5464	18.5127	16.5851	19.9494	19.4693	19.4576	20.6847	15.266	13.1555	19.3966	30.1066	27.7539	13.3702	20.1427	15.6176	14.7707	22.3869	14.7096	15.6122	9.9942	14.4621	14.2939	15.6892	11.8759	18.574	14.9853	14.8837	21.3562	10.8241	14.1135	19.2203	17.148
VIRMA	0.599222	6.02092	5.67721	6.27163	5.63609	5.49183	6.18159	5.41579	5.8654	3.70591	6.79243	4.83194	10.8146	5.96987	6.48115	5.9838	4.89423	5.95769	7.4191	5.90294	8.31735	8.44888	6.38415	7.18219	4.67843	5.53898	7.22682	7.52207	5.35901	7.60408	7.6439	6.63498	7.03077	7.46274	5.88474	5.13491	7.19749	4.25075	7.56965	6.33647	8.7084	6.15957	7.3111	7.09426	14.6065	8.65722	9.66528	6.78916	7.7173
WTAP	0.157374	18.2924	17.9614	16.3115	18.1394	20.5336	17.1266	16.5903	19.2429	19.435	11.8358	18.4032	17.9888	24.6624	22.0613	20.8531	15.5524	20.2631	16.9108	15.0795	19.774	21.9272	15.9391	18.5903	21.2362	21.1579	17.255	24.3445	20.1857	14.464	17.9654	17.8276	16.503	19.2504	23.0923	17.1313	14.672	17.9385	18.0956	19.422	18.4139	18.4585	16.7381	18.391	18.5594	21.6578	18.0891	20.0365	18.6404
ZC3H13	4.71466e-06	8.98699	8.15427	8.12523	9.51844	6.66696	6.5521	10.6615	8.163	7.68465	19.8347	8.44167	8.18984	5.3322	6.38646	10.3436	8.85694	11.1885	7.80828	6.03812	9.16609	8.11525	11.8727	7.25734	9.62649	12.1382	14.2971	15.288	5.43014	9.62563	10.1188	11.3015	13.4597	7.89661	10.1039	10.5237	14.1973	7.67931	14.8405	9.19309	10.4048	6.13132	15.0901	15.4677	9.94998	15.5161	10.3159	13.5081	15.0157
METTL16	0.000706259	5.14532	4.62239	5.29549	5.11722	4.31614	5.19466	5.83223	4.67842	4.13081	5.80875	5.07278	6.7019	5.96537	6.17173	5.20996	4.58309	5.21037	6.29628	2.90092	4.58319	5.5105	4.91525	6.16668	5.48247	4.98636	3.75315	7.75706	5.05734	5.55449	5.63262	5.38521	5.38452	4.97793	5.10547	5.49574	5.48247	3.21203	6.21132	5.39216	5.60364	4.92488	5.75553	5.76636	7.08599	4.6827	7.05162	5.60817	6.16229
TRA2A	0.000132566	22.6633	21.5629	22.1775	20.4431	19.4251	20.0993	17.7862	19.8034	28.886	32.1828	27.4428	18.0595	18.0332	26.8708	26.0939	28.1045	24.0332	23.8471	21.0245	18.7975	19.5821	23.8282	24.7614	30.1842	20.9798	25.1516	30.8092	19.0757	19.481	21.7042	17.9139	17.5723	18.2023	15.5147	14.9938	21.3752	34.949	20.4205	18.8125	24.0427	24.4407	22.8729	28.543	27.2477	21.444	17.9363	21.0857	28.8839
CAPRIN1	1.06661e-08	39.1291	39.5216	37.3202	33.675	29.7181	32.113	40.7419	32.9422	23.7573	44.5887	30.975	43.5099	40.1103	38.0363	26.643	41.6888	37.1662	65.2591	41.4157	47.3614	51.8986	42.967	50.1687	48.1031	36.3662	46.7921	46.8072	45.5599	54.6029	47.1628	41.2392	43.4276	55.9485	32.6936	29.5139	42.7524	54.7118	42.8852	32.5422	53.3437	43.8504	51.6338	57.0878	56.3916	40.983	53.9792	49.9898	61.4417
ALKBH5	0.817052	39.6005	39.2103	40.6058	37.6464	38.2554	36.8503	40.694	38.1428	37.6696	40.7564	34.2093	40.8752	40.3485	51.2124	39.3934	49.0024	37.6516	37.6941	46.4464	27.0599	39.4623	38.9169	36.8994	36.7941	41.6957	26.5817	55.1756	49.5374	35.0437	44.1554	34.88	34.9473	46.551	45.533	45.4849	41.8106	27.5499	33.9133	44.2514	38.4985	38.8667	38.0664	38.1934	34.0631	27.5234	41.1629	43.1628	35.8762
FTO	0.000288959	2.4221	2.20336	2.18569	2.45908	2.0327	2.1457	2.96674	2.11496	1.7273	1.85865	2.20591	2.21944	2.50048	4.44864	2.62257	2.52996	2.37672	5.96926	2.30755	1.76779	2.9127	2.51985	2.29949	2.27205	2.53039	2.61275	1.67951	3.04167	2.5602	2.76186	3.10851	2.77033	3.11463	2.56069	2.98137	3.17816	2.44068	2.80586	2.65427	3.39211	1.82442	2.89206	2.89475	1.59297	2.80067	3.01222	2.92963	3.30161
EIF3A	0.60682	47.425	46.9325	44.0838	46.2151	45.2502	44.8855	51.6964	44.5572	31.5024	50.7902	41.9271	60.995	39.9029	42.1468	36.1203	45.5792	50.7533	73.1669	46.135	61.6107	56.822	54.7119	67.047	52.3904	51.1256	56.2523	64.434	48.0075	63.3413	60.0264	54.5552	49.2829	55.6322	46.4955	42.6643	49.009	32.8505	57.0436	44.4564	60.3119	44.8672	59.0197	56.0379	63.6294	51.2167	55.2015	61.0925	57.8022
EIF3B	0.243659	28.2174	29.883	30.8063	21.288	30.9951	31.3723	28.6175	27.1714	20.5278	31.5341	27.3695	26.45	28.0109	28.2359	17.1652	28.6384	24.6163	31.5128	34.6841	26.5194	26.2558	20.8147	36.2508	33.022	18.5622	26.6694	25.7906	32.712	31.9441	27.3316	20.753	20.0041	35.451	19.3267	21.988	19.5795	26.7072	22.6656	23.0866	20.6143	35.0279	20.6486	19.0388	33.6534	18.5601	17.9752	27.91	29.8795
EIF3C	0.000100122	1.25873	1.25854	1.21043	0.9141	1.03832	0.848611	1.08933	1.08858	0.706749	1.40991	1.17648	1.63985	1.49471	1.01111	1.21133	1.16649	1.49789	2.4455	1.82821	1.30084	1.85776	1.50884	1.49887	1.21259	0.941065	0.889764	1.39316	2.40911	1.72058	2.46319	1.56238	0.666876	1.72677	1.07703	0.938973	1.30864	1.14819	0.847513	1.06977	0.565685	1.37282	1.54025	1.83328	2.37047	1.56875	1.20419	1.40888	1.44141
EIF3D	0.0301895	69.7187	64.9152	62.8562	56.9812	62.3473	60.9056	63.1818	62.5486	51.8207	46.0602	80.8579	73.8929	83.3281	77.4418	59.5975	48.5991	66.6798	82.6174	41.0857	85.4634	69.3595	40.4622	93.684	72.9266	41.764	77.0688	69.45	88.4275	59.6639	82.5575	57.6694	67.6864	104.763	48.7981	59.9613	50.007	47.6676	59.6373	78.5923	51.1986	63.4445	54.0636	58.759	52.3796	49.5669	58.0897	71.3456	66.677
EIF3E	0.429332	61.5608	56.6607	65.0644	50.9353	56.4467	58.6068	66.1566	57.8565	42.1632	32.6261	68.8611	93.5319	95.7654	65.061	57.5995	28.911	57.1797	80.8128	55.3123	83.3367	69.3155	40.8626	91.3243	73.7476	39.7769	65.1177	46.5663	57.9233	62.7619	79.5891	54.1246	59.9731	83.2188	36.817	37.3719	52.6982	49.0462	63.5546	71.211	58.7885	54.1162	54.3215	64.0021	202.592	59.6939	74.3569	56.8438	68.3901
EIF3F	0.0518941	18.9784	18.3256	18.2593	15.9246	18.7011	17.5151	18.4625	16.9859	18.2244	13.662	24.2154	16.1763	26.3733	19.2926	19.0236	14.7211	17.0532	23.7523	16.0967	23.3001	22.1389	12.9176	23.7564	21.2843	11.7764	17.6417	19.5597	20.7239	16.5421	21.2372	14.8476	17.8603	27.59	14.8676	16.2296	15.8786	14.9666	14.4238	20.153	15.0545	20.3007	14.9372	16.421	25.3485	13.7829	17.3161	16.5172	17.898
EIF3G	0.521751	45.7637	49.7421	48.2221	37.4481	47.9279	42.825	40.2383	46.1304	43.2433	40.7493	58.2923	37.9698	47.034	45.0797	36.2393	37.4549	35.4756	38.5713	46.2754	40.6423	41.5223	28.2962	47.8275	43.5869	26.0798	37.4466	37.69	44.8191	32.1355	39.2526	28.3265	30.3397	52.4655	36.3063	42.9594	30.3593	25.179	29.7379	37.9416	26.0173	40.9083	25.0076	30.7887	18.7262	25.073	26.2738	37.9908	26.3682
EIF3H	0.387891	40.1665	41.4494	44.7413	31.8122	41.369	41.343	40.908	37.8543	28.2437	29.4431	41.4393	47.4081	49.535	50.3584	37.006	23.9799	33.6111	44.3505	44.4492	50.6556	45.2888	27.4432	48.015	46.444	25.476	38.527	37.1315	39.0312	31.9078	45.6845	31.6062	32.6479	52.3623	25.9109	28.3217	31.5532	62.5442	35.0679	39.552	32.6345	55.4461	31.107	35.6454	120.11	38.8334	47.0049	34.7601	36.4058
EIF3I	0.0533464	162.627	151.379	156.117	121.326	159.214	151.627	150.896	144.215	161.711	143.263	237.85	169.426	178.283	191.77	91.2093	167.332	125.365	170.17	164.946	155.454	143.277	82.2067	166.734	172.114	98.1071	161.322	148.869	151.956	109.323	169.619	123.782	117.828	207.006	108.019	119.224	116.23	142.616	132.958	141.45	133.853	224.547	118.379	135.933	161.041	124.334	122.872	150.602	145.173
EIF3J	0.00453028	24.003	25.6742	24.5153	21.0394	19.9934	23.1126	26.469	22.5077	18.2289	23.7843	24.7633	26.5828	27.7557	28.3055	18.3631	21.9818	24.2106	33.2411	23.4401	28.6151	31.9226	24.5663	40.0872	30.0718	24.4724	28.8501	28.6107	22.7628	24.5685	30.9671	27.9257	19.7304	35.3425	18.0542	14.3805	19.0328	26.6589	24.4585	23.6836	26.9178	26.0604	29.8578	31.2674	34.9363	26.2246	26.9963	23.4097	32.9999
EIF3K	0.142238	54.26	52.1715	49.4437	45.4163	51.6943	47.9421	48.4475	49.991	50.9537	41.2626	55.1211	43.2812	57.657	64.4652	52.0199	49.8626	42.9842	53.1992	55.8251	59.4887	51.7261	39.7865	59.4855	69.5024	35.968	51.2087	55.6434	54.7423	42.1211	59.2244	38.2412	45.8358	76.3682	37.6482	49.8474	36.8199	37.1118	37.0743	49.9405	35.297	77.4234	32.0802	40.826	54.1352	31.0864	40.4154	40.0851	43.5332
EIF3L	4.2072e-07	65.7372	56.6522	52.4094	56.2868	53.2567	49.3101	51.3181	53.2832	30.4253	35.8566	62.6437	70.01	88.0478	70.405	64.2991	51.1897	71.6924	114.416	56.7203	101.104	84.5763	54.7095	100.847	79.6753	51.1652	81.7959	74.9137	80.0257	71.3342	92.0803	61.6394	73.7004	91.2688	55.7197	66.5535	58.0448	47.3706	75.3945	72.3107	64.5292	65.0799	64.7669	70.672	102.145	55.3171	70.1537	81.6366	80.0618
EIF3M	0.0237958	20.1041	19.9086	19.7247	16.8839	18.7287	16.3297	19.6431	18.3499	16.3927	15.035	22.7006	23.6742	29.0981	19.0858	19.6109	12.0595	17.7808	23.0861	18.1591	25.2682	21.43	14.6748	28.2032	25.7083	13.1298	20.6333	19.3629	20.8323	21.766	23.7127	17.8349	17.9833	29.5501	13.4194	13.0857	14.632	17.4461	19.6846	22.6011	19.2811	20.7124	17.4494	20.6002	26.1335	15.5775	20.2153	16.6464	21.6861
FMR1	0.134378	4.63085	4.60405	4.72398	4.98827	4.24324	4.79605	5.42066	4.63966	4.56115	6.90108	4.5189	5.37474	4.25378	5.02866	6.1388	3.55506	4.99907	6.24924	3.93598	4.86862	5.82106	5.58999	4.09247	4.19727	5.4564	5.6645	4.57274	3.53608	6.00512	5.07406	5.0348	5.1853	5.81216	4.12695	3.73235	6.20434	5.9104	5.88751	5.1455	6.58451	3.22889	6.67021	7.42044	6.52693	7.25668	6.67276	4.18191	5.69494
HNRNPA2B1	0.345831	75.2316	77.6054	81.3404	67.609	80.4634	76.2567	75.1006	73.8273	88.1248	83.8486	98.0722	57.86	65.2789	90.5803	68.1916	68.8091	74.503	83.4447	85.7003	65.1596	68.6404	71.7914	75.2626	84.8119	71.7508	85.3177	85.1612	73.3332	70.4456	74.3045	66.1553	54.2481	75.9282	58.7914	57.8879	65.3324	81.3752	73.1199	66.4622	62.9931	65.508	79.6245	77.4652	89.8793	77.687	65.0186	69.8995	76.2209
HNRNPC	4.98929e-06	58.7481	59.0211	59.8381	47.2696	50.0893	55.5769	59.1605	52.853	53.7378	49.0304	61.5265	55.5587	55.9014	85.7295	50.2909	59.1085	57.3551	66.7049	60.3635	55.39	69.6401	52.3267	62.0555	61.4473	50.4738	71.0114	67.2286	63.6012	54.1666	59.8101	49.3194	49.4317	82.2833	40.6128	45.7778	55.2557	65.1134	56.99	57.8684	63.2439	54.0085	63.111	61.3036	66.1428	57.859	56.1014	58.301	60.0916
IGF2BP1	0.102538	0.00453182	0.00520154	0.00538037	0.0056969	0.0364713	0.0183699	0.0257811	0.00434974	0	0.00188274	0.0048094	0	0.00298356	0.00288108	0.00162321	0.00489923	0.00482404	0.00529011	0.0106402	0.0041202	0.00567316	0.017083	0.0122221	0	0.00480881	0.0116581	0.00633738	0	0.00322449	0.00498818	0.00624813	0.00264848	0	0.00563894	0.00356885	0	0.0103743	0.00495889	0.0027516	0.00681039	0.00475419	0.00675396	0	0.0104824	0.00643015	0	0.0115343	0.00167653
IGF2BP2	2.86257e-10	0.317552	0.375665	0.994496	0.558702	0.489336	0.528484	1.55437	0.577284	0.0342487	0.333218	0.078643	0.162524	0.218107	0.0997652	0.755686	0.0918932	0.160858	0.156046	0.456463	0.301198	0.436552	0.292486	0.178023	0.496672	0.152641	0.252308	0.451089	0.194869	0.397001	0.0623743	0.176292	0.667451	0.377896	0.620504	0.592731	0.282768	0.22286	0.429287	0.883999	0.441085	0.420712	0.394987	0.334654	0.174769	0.358732	0.270861	0.338386	0.25802
IGF2BP3	0.437573	0.00683262	0.00840136	0.00587364	0.0132536	0.0106514	0.0232016	0.00682864	0.0148775	0.00272198	0.00604506	0.00772097	0.00661597	0.00638639	0	0.00347452	0.00262173	0	0.00943633	0.0113878	0.00440969	0.00809569	0.00914164	0.00560609	0.00502396	0.00772003	0.0124772	0.0237393	0.00888632	0.0155297	0	0.00445809	0.00850371	0.00816459	0.00241406	0.0038196	0.00345747	0.0129537	0.00265365	0	0.00485926	0	0.0130113	0.0103434	0.00373965	0.0103229	0.00456637	0.00617237	0.00538299
LRPPRC	0.00326117	18.375	18.0443	16.1658	15.693	14.5491	16.7746	17.9946	16.2822	9.41388	21.4935	15.2343	25.7042	24.7157	20.6751	14.6919	15.3669	19.867	28.6278	19.7716	29.6094	27.2327	19.1881	26.9496	23.7277	13.5293	23.1918	21.9819	18.3282	26.4949	26.6432	22.2642	21.3096	26.7899	14.8612	12.5971	19.2026	17.4217	23.6798	18.395	24.5855	15.1556	24.1713	18.8278	43.7963	18.6834	28.4753	20.117	17.7735
PRRC2A	0.00108913	57.833	63.1381	62.8685	48.4832	49.3181	53.7717	57.6566	53.8208	51.6608	60.0781	51.6886	57.9477	53.8775	34.0781	37.5283	71.0423	63.9552	73.1916	62.5561	65.1716	70.7563	64.0583	57.3748	46.045	53.7127	66.9988	64.5069	96.6473	58.7083	62.5853	51.6568	51.6458	65.9	58.2931	56.9047	54.5609	49.7931	55.721	41.2798	49.6695	42.1784	62.4289	60.4049	51.7701	46.2521	51.0986	75.7047	56.5156
PRRC2C	0.147123	12.4882	12.0166	12.9217	14.7538	11.633	13.1435	14.15	12.5425	9.44292	17.5806	7.72287	15.1541	8.26459	9.36392	15.5568	10.1649	14.0531	15.4562	11.0845	16.5265	15.704	15.5499	15.1594	12.0556	17.6707	16.7986	15.2413	10.7431	17.8608	14.744	15.629	12.3732	10.5363	15.3722	13.8846	15.9362	11.3582	17.5704	10.2836	14.7944	6.97882	16.3604	15.5493	21.2465	18.3552	17.217	17.1688	16.7531
RBMX	4.79083e-12	30.1539	30.4657	31.9134	25.3195	26.1379	26.5848	26.9699	24.9582	24.7658	30.0049	35.9661	30.9656	39.2412	31.0981	32.465	27.1275	31.7576	42.4529	32.8037	40.1214	35.1482	25.2673	41.4079	36.0965	23.8417	33.6076	30.8068	32.7702	29.3869	32.4365	24.7609	29.2765	40.4269	24.6626	21.374	26.0396	25.5474	30.3684	29.0016	29.3128	23.9157	30.6605	33.0549	44.5876	28.355	30.9532	31.3015	31.1065
YTHDC1	0.00014576	13.5609	12.9687	13.0991	13.072	11.9594	12.3429	12.6606	12.6568	13.1647	16.8596	14.6528	12.5557	12.7345	12.8719	16.0285	12.2103	14.6641	14.1255	11.2717	14.0314	16.4711	12.8081	15.0382	13.201	13.455	17.4422	16.5375	12.274	13.4809	13.9633	12.8149	12.0419	14.7313	12.1152	11.4387	16.136	14.2268	15.9176	15.6188	14.5944	9.6297	15.9264	16.3847	16.8782	17.5687	15.9816	14.1773	15.4279
YTHDC2	0.0010392	4.13569	3.7515	3.48823	4.08039	3.29528	3.90119	4.04106	3.64906	3.45274	4.25416	3.90051	5.79953	3.14087	3.50128	3.9849	3.29154	4.21167	8.7441	4.06468	4.90303	4.96096	4.87717	4.88339	3.80901	4.33742	6.23211	4.4966	3.30468	4.77402	5.69437	4.57271	3.60671	3.79856	3.75836	2.84531	4.47954	3.67973	6.28528	3.29525	5.70879	2.52778	5.05325	5.86016	6.75054	5.4925	4.99699	4.78898	4.68905
YTHDF1	0.151601	21.6183	22.5725	22.3037	18.5854	20.8278	20.4361	19.229	20.5928	21.7491	26.4183	16.1712	23.904	18.6149	22.9842	21.527	28.0964	21.8224	28.6167	19.5194	23.7169	21.8803	25.7149	20.2022	19.1385	23.0164	24.4654	30.3851	20.9825	28.2152	23.0765	19.7071	20.8509	27.6976	18.0253	21.3015	20.7349	24.5385	19.609	17.9421	22.3324	21.3403	22.0927	24.3643	24.0664	18.1519	21.0118	22.8967	28.3363
YTHDF2	0.0282869	18.1661	17.8673	18.9851	16.419	15.9341	16.9924	17.2569	17.3859	14.468	22.6072	14.883	20.5594	17.3177	17.8382	19.5561	21.0039	18.5114	31.7255	17.6162	19.9471	18.8951	17.4964	20.879	17.1357	18.8256	19.772	26.9788	20.2847	19.207	21.4529	18.0029	19.9302	27.7217	15.6052	16.5	16.387	22.5861	18.5118	20.3164	20.0784	18.8456	18.0723	20.4535	24.4546	14.9238	17.9031	17.8706	20.7406
YTHDF3	0.0690254	16.8723	17.6163	16.0616	15.9128	13.9901	17.3483	17.8304	15.9812	11.559	24.6409	13.9786	29.0146	16.7129	22.4156	15.6879	18.5156	17.7798	15.7732	15.0029	21.5454	24.5904	23.681	17.8322	15.1491	23.7106	21.6721	21.6091	17.5463	20.0999	16.3524	22.6346	23.808	19.3482	15.432	15.5589	19.901	14.2472	21.1853	16.6824	31.9289	17.7098	24.7804	29.6508	34.2658	31.2178	25.96	23.0274	27.2796
[truncated: 294 more columns]
