# Supplementary material for: Systematic Investigation of mRNA N6-Methyladenosine Machinery in Primary Prostate Cancer
Source: Dis Markers. 2020 Nov 12;2020:8833438. doi: 10.1155/2020/8833438 (PMC7676945; doi:10.1155/2020/8833438)
Supplement: Supplementary Materials — include a word file, six figures, and nine spreadsheets. The supplementary materials.docx includes four tables and provides a description for each supplementary material file. [file 8833438.f1.zip › 8833438.f1/Excel S6.xlsx]

## Sheet: Sheet1
Excel S6 EIF3D Induced Proteins
Protein	Coefficient of Pearson Correlation with EIF3D	FDR of Pearson Correlation with EIF3D	Coefficient of Pearson Correlation with METTL3	FDR of Pearson Correlation with METTL3	Bound by EIF3Da	Containing Preferred Sites for m6A Modificationsb
EEF2K	0.152135	0.0880659	0.0292019	0.700894		✔
EIF4EBP1	0.157291	0.0880659	0.12066	0.0751874		✔
ERBB3	0.149182	0.0880659	0.112492	0.105158	✔
KDR	0.146538	0.0880659	0.0867283	0.208801		✔
MYC	0.164171	0.0880659	-0.0123591	0.859698		✔
RPS6KB1	0.147182	0.0880659	0.150558	0.023799		✔
a Found in human HepG2 liver cancer cells
b Based on the RMBase database (Xuan JJ, Sun WJ, Lin PH, et al. Nucleic Acids Res. 2018;46(D1):D327-D334)
