# Supplementary material for: Systematic Investigation of mRNA N6-Methyladenosine Machinery in Primary Prostate Cancer
Source: Dis Markers. 2020 Nov 12;2020:8833438. doi: 10.1155/2020/8833438 (PMC7676945; doi:10.1155/2020/8833438)
Supplement: Supplementary Materials — include a word file, six figures, and nine spreadsheets. The supplementary materials.docx includes four tables and provides a description for each supplementary material file. [file 8833438.f1.zip › 8833438.f1/Excel S7.xlsx]

## Sheet: Biological Processes 
Excel S7 Biological Processes Enriched in the EIF3D Induced Proteins
ID	Description	Adjusted p-value	Gene IDs	Gene Count
GO:0035690	cellular response to drug	0.00184186	EIF4EBP1/KDR/MYC/RPS6KB1	4
GO:0048015	phosphatidylinositol-mediated signaling	0.00448681	ERBB3/KDR/RPS6KB1	3
GO:0048017	inositol lipid-mediated signaling	0.00448681	ERBB3/KDR/RPS6KB1	3
GO:0044843	cell cycle G1/S phase transition	0.00502228	EIF4EBP1/MYC/RPS6KB1	3
GO:0070371	ERK1 and ERK2 cascade	0.00666305	ERBB3/KDR/MYC	3
GO:0006446	regulation of translational initiation	0.00910791	EIF4EBP1/RPS6KB1	2

## Sheet: Pathways
Excel S7 Pathways Enriched in the EIF3D Induced Proteins
ID	Description	Adjusted p-value	Gene IDs	Gene Count
hsa04012	ErbB signaling pathway	1.12802e-05	EIF4EBP1/ERBB3/MYC/RPS6KB1	4
hsa04151	PI3K-Akt signaling pathway	2.71515e-05	EIF4EBP1/ERBB3/KDR/MYC/RPS6KB1	5
hsa05205	Proteoglycans in cancer	0.000173363	ERBB3/KDR/MYC/RPS6KB1	4
hsa04152	AMPK signaling pathway	0.00100279	EEF2K/EIF4EBP1/RPS6KB1	3
R-HSA-165159	mTOR signaling	5.34396e-05	EEF2K/EIF4EBP1/RPS6KB1	3
