# Supplementary material for: Systematic Investigation of mRNA N6-Methyladenosine Machinery in Primary Prostate Cancer
Source: Dis Markers. 2020 Nov 12;2020:8833438. doi: 10.1155/2020/8833438 (PMC7676945; doi:10.1155/2020/8833438)
Supplement: Supplementary Materials — include a word file, six figures, and nine spreadsheets. The supplementary materials.docx includes four tables and provides a description for each supplementary material file. [file 8833438.f1.zip › 8833438.f1/Excel S8.xlsx]

## Sheet: Sheet1
Excel S8 m6A-Dependent HNRNPA2B1 Induced Alternative Splicing Isoforms
Transcript	Gene	Coefficient of Pearson Correlation with HNRNPA2B1	FDR of Pearson Correlation with HNRNPA2B1	Coefficient of Pearson Correlation with METTL3	FDR of Pearson Correlation with METTL3	Bound by HNRNPA2B1a	Containing Preferred Sites for m6A Modificationsb
ENST00000248450.8	AAMP	0.327351	4.36045e-12	0.320021	6.56431e-12		✔
ENST00000420660.5	AAMP	0.331099	2.30551e-12	0.306633	5.76121e-11		✔
ENST00000475678.5	AAMP	0.343661	2.53059e-13	0.571436	1.007e-40		✔
ENST00000497882.5	ABCB6	0.338772	6.07445e-13	0.462102	2.56475e-25		✔
ENST00000466742.5	ABCF3	0.325752	5.71605e-12	0.439931	8.81952e-23	✔	✔
ENST00000478288.5	ABCF3	0.300408	3.29453e-10	0.337282	3.35062e-13	✔	✔
ENST00000461108.5	ABHD14B	0.313034	4.59749e-11	0.521649	4.6336e-33		✔
ENST00000578270.5	ABHD3	0.304346	1.80248e-10	0.439466	9.89733e-23		✔
ENST00000454023.1	ABI2	0.306681	1.25646e-10	0.303269	9.76397e-11		✔
ENST00000580440.5	AC005154.6	0.36387	5.80015e-15	0.326773	2.09998e-12		✔
ENST00000623179.1	AC007191.4	0.313824	4.05578e-11	0.434035	3.84961e-22		✔
ENST00000418868.5	AC024560.3	0.316444	2.65303e-11	0.454442	2.03964e-24		✔
ENST00000612970.4	AC159540.1	0.324163	7.43266e-12	0.488513	1.47029e-28		✔
ENST00000619546.4	ACACA	0.456553	3.13536e-24	0.489836	9.922e-29	✔	✔
ENST00000357481.6	ACIN1	0.405452	9.5263e-19	0.367729	1.08432e-15	✔	✔
ENST00000557039.1	ACIN1	0.302705	2.3143e-10	0.463877	1.58213e-25	✔	✔
ENST00000557515.5	ACIN1	0.34155	3.69234e-13	0.362515	3.01842e-15	✔	✔
ENST00000513001.5	ACSL1	0.312366	5.11281e-11	0.482476	8.50589e-28		✔
ENST00000429709.6	ACTL6A	0.403086	1.63545e-18	0.350327	3.082e-14		✔
ENST00000465121.5	ACY1	0.34714	1.35099e-13	0.604376	1.57555e-46		✔
ENST00000238618.7	ACYP1	0.300554	3.22264e-10	0.300017	1.61836e-10		✔
ENST00000461564.6	ADAM15	0.309238	8.42346e-11	0.498115	8.34864e-30	✔	✔
ENST00000527418.5	ADAM15	0.332977	1.66197e-12	0.470533	2.5187e-26	✔	✔
ENST00000534019.1	ADAM15	0.334236	1.33614e-12	0.447375	1.31159e-23	✔	✔
ENST00000623063.3	ADSL	0.320765	1.30564e-11	0.33086	1.03591e-12		✔
ENST00000432230.6	AF127936.9	0.350737	7.01496e-14	0.300194	1.5746e-10		✔
ENST00000409183.5	AFTPH	0.341761	3.55301e-13	0.380054	8.77693e-17		✔
ENST00000412531.3	AGAP6	0.311334	6.03025e-11	0.510359	1.82229e-31		✔
ENST00000470839.1	AGBL3	0.311469	5.90506e-11	0.422255	6.8666e-21		✔
ENST00000629555.2	AGK	0.562456	7.76281e-39	0.470139	2.81362e-26	✔	✔
ENST00000216479.7	AHSA1	0.386214	6.29867e-17	0.367895	1.04931e-15		✔
ENST00000287295.7	AIFM1	0.342425	3.15428e-13	0.361616	3.59742e-15		✔
ENST00000487258.5	AKAP9	0.351411	6.19453e-14	0.41663	2.60801e-20		✔
ENST00000471651.1	AKR1A1	0.411466	2.43861e-19	0.608492	3.17963e-47		✔
ENST00000402615.6	AKT1	0.347648	1.23348e-13	0.45473	1.88831e-24	✔	✔
ENST00000553506.5	AKT1	0.304392	1.7908e-10	0.484187	5.16295e-28	✔	✔
ENST00000554581.5	AKT1	0.338563	6.30563e-13	0.52265	3.36636e-33	✔	✔
ENST00000555528.5	AKT1	0.364625	5.00524e-15	0.427706	1.83632e-21	✔	✔
ENST00000610370.1	AKT1	0.334612	1.25118e-12	0.533034	1.01161e-34	✔	✔
ENST00000391833.5	AKT1S1	0.318263	1.96656e-11	0.530818	2.16265e-34		✔
ENST00000483166.5	AKT2	0.322293	1.01502e-11	0.548601	4.60104e-37	✔	✔
ENST00000579047.5	AKT2	0.302281	2.4632e-10	0.527877	5.86013e-34	✔	✔
ENST00000472644.6	ALCAM	0.427436	5.5339e-21	0.364035	2.2479e-15	✔	✔
ENST00000461415.5	ALG3	0.303229	2.13705e-10	0.376297	1.91201e-16		✔
ENST00000299626.9	ALG8	0.385989	6.61009e-17	0.356083	1.04528e-14		✔
ENST00000573939.1	ALOX12-AS1	0.341459	3.75422e-13	0.363491	2.49897e-15	✔	✔
ENST00000502637.5	AMACR	0.302584	2.35506e-10	0.335755	4.39382e-13		✔
ENST00000502562.5	ANAPC10	0.327923	3.9668e-12	0.357287	8.29838e-15	✔	✔
ENST00000441917.6	ANAPC5	0.335978	9.89026e-13	0.392447	6.29631e-18		✔
ENST00000534976.5	ANAPC5	0.336811	8.55798e-13	0.6008	7.15189e-46		✔
ENST00000535482.1	ANAPC5	0.314414	3.68253e-11	0.53185	1.52442e-34		✔
ENST00000535641.5	ANAPC5	0.300201	3.39699e-10	0.547705	6.32497e-37		✔
ENST00000421706.1	ANKHD1	0.311288	6.072e-11	0.339499	2.24899e-13	✔	✔
ENST00000512231.5	ANKRD13D	0.302663	2.3281e-10	0.422034	7.23895e-21		✔
ENST00000544253.1	ANKRD49	0.3212	1.21576e-11	0.441388	6.1006e-23		✔
ENST00000591653.5	ANKS3	0.310575	6.81152e-11	0.520624	6.51642e-33		✔
ENST00000274000.9	AP1AR	0.437086	5.05126e-22	0.304097	8.58882e-11		✔
ENST00000250244.10	AP1M2	0.367903	2.63707e-15	0.346636	6.12026e-14		✔
ENST00000482301.1	APEH	0.333964	1.40215e-12	0.508192	3.6444e-31		✔
ENST00000216714.7	APEX1	0.356396	2.42692e-14	0.396064	2.85025e-18		✔
ENST00000395787.3	APIP	0.327848	4.01333e-12	0.336955	3.55091e-13		✔
ENST00000525604.1	APLP2	0.308976	8.77761e-11	0.454899	1.8059e-24		✔
ENST00000379226.8	APOO	0.454069	6.1403e-24	0.397851	1.92202e-18		✔
ENST00000546731.1	APPL2	0.324923	6.5494e-12	0.472416	1.4847e-26		✔
ENST00000447009.1	APTR	0.346428	1.53691e-13	0.337104	3.45635e-13		✔
ENST00000470670.5	ARF1	0.319865	1.51025e-11	0.335676	4.45743e-13	✔	✔
ENST00000517955.2	ARFGEF1	0.364014	5.643e-15	0.392191	6.65933e-18	✔	✔
ENST00000529847.1	ARFIP2	0.311381	5.98599e-11	0.521945	4.22912e-33		✔
ENST00000530410.1	ARFIP2	0.350639	7.14232e-14	0.549295	3.66077e-37		✔
ENST00000310343.13	ARHGAP32	0.329466	3.04523e-12	0.319645	6.99356e-12		✔
ENST00000377307.6	ARHGAP39	0.361356	9.4964e-15	0.368831	8.69005e-16	✔	✔
ENST00000483068.1	ARHGEF26	0.395255	9.13557e-18	0.378369	1.24777e-16		✔
ENST00000452385.5	ARIH2	0.347413	1.28561e-13	0.483383	6.54511e-28	✔	✔
ENST00000466850.1	ARIH2	0.36265	7.37161e-15	0.301587	1.26879e-10	✔	✔
ENST00000304414.11	ARL6IP1	0.516454	5.88978e-32	0.336421	3.9032e-13		✔
ENST00000479145.1	ARMC10	0.3112	6.15677e-11	0.447258	1.35161e-23		✔
ENST00000269932.10	ARMC6	0.349731	8.43645e-14	0.348361	4.45315e-14	✔	✔
ENST00000473551.5	ARVCF	0.329508	3.02502e-12	0.559304	9.76136e-39		✔
ENST00000394308.7	ASNS	0.355147	3.07716e-14	0.311482	2.65648e-11		✔
ENST00000455086.5	ASNS	0.320765	1.30564e-11	0.372567	4.08633e-16		✔
ENST00000287394.9	ATAD2	0.401075	2.55902e-18	0.364465	2.06609e-15	✔	✔
ENST00000381024.4	ATAD2B	0.470821	6.43593e-26	0.339427	2.27826e-13	✔	✔
ENST00000404241.6	ATF4	0.324625	6.88268e-12	0.574427	3.26022e-41		✔
ENST00000375203.7	ATF6B	0.356542	2.36076e-14	0.383864	3.94394e-17		✔
ENST00000589726.1	ATF7	0.31879	1.80445e-11	0.378474	1.22079e-16	✔	✔
ENST00000392020.8	ATG16L1	0.306525	1.28739e-10	0.336884	3.59628e-13	✔	✔
ENST00000479942.5	ATG16L1	0.302722	2.3082e-10	0.417129	2.32115e-20	✔	✔
ENST00000429136.5	ATP13A3	0.551383	4.03496e-37	0.394989	3.6096e-18		✔
ENST00000428331.6	ATP2C1	0.374597	6.97671e-16	0.336832	3.62992e-13		✔
ENST00000356708.11	ATP5C1	0.472752	3.77344e-26	0.431624	7.00466e-22		✔
ENST00000395659.1	ATP5E	0.317061	2.39409e-11	0.354224	1.48949e-14		✔
ENST00000513347.1	ATP5G1	0.351392	6.21191e-14	0.534629	5.78402e-35		✔
ENST00000514808.5	ATP5G1	0.519801	1.95503e-32	0.449882	6.8031e-24		✔
ENST00000497075.5	ATP5G3	0.364014	5.643e-15	0.359359	5.56424e-15		✔
ENST00000485011.1	ATP5J2	0.327526	4.23254e-12	0.310977	2.88106e-11		✔
ENST00000532642.5	ATP6V0B	0.309694	7.83124e-11	0.437055	1.81209e-22		✔
ENST00000514372.5	ATP8A1	0.352207	5.34346e-14	0.393578	4.91555e-18		✔
ENST00000468425.2	ATPIF1	0.351205	6.43583e-14	0.506076	7.12651e-31		✔
ENST00000513291.1	ATR	0.353617	4.10855e-14	0.49085	7.3137e-29	✔	✔
ENST00000482777.5	ATXN2	0.358157	1.7414e-14	0.576395	1.52078e-41	✔	✔
ENST00000451805.2	AURKAPS1	0.30435	1.80166e-10	0.326765	2.10223e-12		✔
ENST00000337198.9	AZIN1	0.463459	4.84897e-25	0.324842	2.91426e-12	✔	✔
ENST00000358716.8	BAZ1A	0.345957	1.66757e-13	0.3034	9.56629e-11	✔	✔
ENST00000553385.1	BAZ1A	0.300364	3.31615e-10	0.42986	1.08675e-21	✔	✔
ENST00000555331.1	BAZ1A	0.312939	4.663e-11	0.334237	5.7501e-13	✔	✔
ENST00000588303.1	BCAM	0.319048	1.72935e-11	0.472313	1.52718e-26	✔	✔
ENST00000589558.1	BCAM	0.308347	9.69096e-11	0.412786	6.44063e-20	✔	✔
ENST00000278100.10	BCCIP	0.407787	5.64301e-19	0.334685	5.31862e-13		✔
ENST00000431802.5	BCS1L	0.32013	1.44589e-11	0.470708	2.39821e-26		✔
ENST00000490188.1	BCS1L	0.410597	2.97989e-19	0.498069	8.44894e-30		✔
ENST00000483920.1	BDH1	0.380622	2.03482e-16	0.485347	3.70448e-28	✔	✔
ENST00000548411.5	BICD1	0.370246	1.66733e-15	0.414935	3.89046e-20		✔
ENST00000551848.1	BICD1	0.411827	2.2414e-19	0.351388	2.53257e-14		✔
ENST00000471232.5	BIRC6	0.467902	1.44302e-25	0.397927	1.8901e-18	✔	✔
ENST00000612191.4	BNIP2	0.307197	1.15734e-10	0.337493	3.22654e-13		✔
ENST00000540159.3	BNIP3	0.38829	4.04516e-17	0.565678	9.14918e-40	✔	✔
ENST00000563210.1	BOP1	0.30603	1.39137e-10	0.41275	6.4933e-20		✔
ENST00000568812.1	BOP1	0.3008	3.10321e-10	0.411413	8.85889e-20		✔
ENST00000569160.1	BOP1	0.311577	5.80201e-11	0.444827	2.53453e-23		✔
ENST00000490918.5	BPHL	0.311998	5.42218e-11	0.583541	8.68178e-43	✔	✔
ENST00000453705.1	BRCC3	0.326649	4.90728e-12	0.306735	5.66871e-11		✔
ENST00000449025.5	BRD2	0.529277	8.15122e-34	0.418339	1.74961e-20		✔
ENST00000449085.3	BRD2	0.529277	8.15122e-34	0.418339	1.74961e-20		✔
ENST00000463639.1	BRD2	0.307673	1.0747e-10	0.472605	1.40631e-26		✔
ENST00000464592.5	BRD2	0.353499	4.19924e-14	0.447361	1.31515e-23		✔
ENST00000482838.1	BRD2	0.537345	5.49676e-35	0.43393	3.95267e-22		✔
ENST00000463620.1	BRD8	0.320064	1.46068e-11	0.452668	3.27244e-24	✔	✔
ENST00000506023.1	BRIX1	0.366238	3.64523e-15	0.326871	2.06623e-12		✔
ENST00000515798.5	BRIX1	0.331258	2.24413e-12	0.402801	6.38353e-19		✔
ENST00000441730.2	BRPF3	0.408371	4.94314e-19	0.370723	5.94776e-16		✔
ENST00000341071.11	BSDC1	0.309697	7.83015e-11	0.562798	2.64186e-39		✔
ENST00000572899.5	BSG	0.309192	8.48449e-11	0.340209	1.97841e-13		✔
ENST00000287598.10	BUB1B	0.452833	8.52634e-24	0.336484	3.85923e-13	✔	✔
ENST00000481952.1	BUB3	0.358331	1.68597e-14	0.427777	1.80961e-21		✔
ENST00000311916.6	C10orf2	0.3298	2.87544e-12	0.326119	2.3456e-12		✔
ENST00000491890.1	C10orf35	0.323947	7.71316e-12	0.383713	4.07393e-17		✔
ENST00000529032.5	C11orf30	0.455484	4.20605e-24	0.421448	8.32844e-21		✔
ENST00000533988.5	C11orf30	0.441968	1.47647e-22	0.360471	4.50013e-15		✔
ENST00000529405.1	C11orf73	0.315233	3.22912e-11	0.429304	1.24793e-21		✔
ENST00000527352.1	C11orf80	0.408092	5.26179e-19	0.54021	8.77741e-36	✔	✔
ENST00000557553.5	C14orf166	0.333508	1.5179e-12	0.347887	4.8642e-14		✔
ENST00000549240.1	C14orf79	0.306145	1.36599e-10	0.57786	8.26363e-42		✔
ENST00000285697.8	C16orf87	0.447662	3.34802e-23	0.351682	2.39983e-14		✔
ENST00000577809.5	C17orf75	0.397292	5.91349e-18	0.322458	4.36442e-12		✔
ENST00000593287.5	C19orf48	0.393146	1.42829e-17	0.405555	3.41799e-19	✔	✔
ENST00000595794.5	C19orf48	0.36882	2.20755e-15	0.603806	1.97547e-46	✔	✔
ENST00000596655.1	C19orf48	0.320438	1.37505e-11	0.535765	4.00262e-35	✔	✔
ENST00000597705.5	C19orf48	0.312199	5.24475e-11	0.446719	1.55547e-23	✔	✔
ENST00000599004.1	C19orf48	0.30575	1.45505e-10	0.387781	1.72021e-17	✔	✔
ENST00000358011.8	C1orf109	0.477029	1.12178e-26	0.43743	1.65889e-22		✔
ENST00000474140.1	C1orf174	0.318348	1.93917e-11	0.462478	2.31124e-25		✔
ENST00000350592.7	C1orf43	0.407976	5.40366e-19	0.342753	1.24749e-13		✔
ENST00000445935.5	C21orf58	0.301853	2.63545e-10	0.36892	8.54101e-16	✔	✔
ENST00000300260.7	C21orf59	0.445285	6.18783e-23	0.376019	2.0241e-16		✔
ENST00000442398.6	C2CD3	0.359563	1.33706e-14	0.359159	5.78523e-15		✔
ENST00000446773.6	C6orf136	0.307668	1.07554e-10	0.444641	2.66248e-23		✔
ENST00000395788.3	C6orf48	0.36997	1.75905e-15	0.500692	3.80379e-30		✔
ENST00000316937.7	C7orf43	0.300117	3.43652e-10	0.396904	2.36585e-18		✔
ENST00000354926.8	C7orf55-LUC7L2	0.32323	8.70249e-12	0.314191	1.71694e-11		✔
ENST00000509448.5	C7orf73	0.410031	3.39467e-19	0.31372	1.85426e-11		✔
ENST00000286688.5	C8orf37	0.344641	2.12001e-13	0.33958	2.21623e-13		✔
ENST00000523245.1	C8orf59	0.360045	1.22305e-14	0.320289	6.28789e-12	✔	✔
ENST00000624034.1	C9orf163	0.309455	8.13529e-11	0.467128	6.4543e-26		✔
ENST00000333916.7	CAAP1	0.428637	4.12862e-21	0.321092	5.49827e-12	✔	✔
ENST00000489519.1	CACFD1	0.390661	2.43473e-17	0.395416	3.28709e-18		✔
ENST00000587486.6	CALR	0.423722	1.36561e-20	0.556549	2.65213e-38		✔
ENST00000590325.1	CALR	0.336916	8.41428e-13	0.450733	5.46243e-24		✔
ENST00000538733.5	CAMKK2	0.340613	4.37535e-13	0.468685	4.19781e-26	✔	✔
ENST00000545538.5	CAMKK2	0.383232	1.17922e-16	0.489077	1.24688e-28	✔	✔
ENST00000567819.1	CAPN10-AS1	0.318419	1.91729e-11	0.489278	1.17595e-28		✔
ENST00000530820.5	CAPRIN1	0.362997	6.89473e-15	0.305339	7.05535e-11		✔
ENST00000548676.5	CAPRIN2	0.310657	6.72695e-11	0.353982	1.5584e-14		✔
ENST00000378168.6	CASK	0.374671	6.88058e-16	0.329059	1.41348e-12		✔
ENST00000343516.7	CASKIN1	0.39322	1.40902e-17	0.507612	4.37316e-31		✔
ENST00000453159.5	CBR3-AS1	0.485354	9.84415e-28	0.546389	1.00021e-36		✔
ENST00000624080.1	CBR3-AS1	0.371132	1.4026e-15	0.513385	6.833e-32		✔
ENST00000396386.6	CBX3	0.563832	4.79838e-39	0.334618	5.38217e-13		✔
ENST00000456948.5	CBX3	0.510047	4.74193e-31	0.497851	9.01505e-30		✔
ENST00000462165.2	CBX3	0.346794	1.43993e-13	0.393307	5.20613e-18		✔
ENST00000481300.1	CBX3	0.372416	1.08282e-15	0.333831	6.16757e-13		✔
ENST00000497498.1	CBX3	0.45725	2.59702e-24	0.522272	3.79707e-33		✔
ENST00000269397.8	CBX4	0.345308	1.8783e-13	0.42458	3.9226e-21		✔
ENST00000269385.8	CBX8	0.347628	1.23768e-13	0.38536	2.88175e-17		✔
ENST00000265872.10	CCAR1	0.478711	6.89267e-27	0.407149	2.37682e-19		✔
ENST00000480627.2	CCAR1	0.475212	1.8838e-26	0.370454	6.27452e-16		✔
ENST00000446836.5	CCDC12	0.325178	6.27687e-12	0.318111	9.02332e-12	✔	✔
ENST00000409657.5	CCDC14	0.335623	1.05096e-12	0.516994	2.10125e-32		✔
ENST00000495381.5	CCDC14	0.348938	9.72303e-14	0.458576	6.69841e-25		✔
ENST00000587100.1	CCDC159	0.363357	6.41476e-15	0.454405	2.06002e-24		✔
ENST00000589186.5	CCDC159	0.324539	6.97997e-12	0.362929	2.78879e-15		✔
ENST00000589477.1	CCDC159	0.404284	1.24176e-18	0.572882	5.84632e-41		✔
ENST00000317945.6	CCDC34	0.373732	8.32053e-16	0.349498	3.59968e-14		✔
ENST00000392456.3	CCDC50	0.352203	5.34586e-14	0.36493	1.88489e-15		✔
ENST00000479899.5	CCDC58	0.450493	1.58503e-23	0.349976	3.29052e-14		✔
ENST00000548673.5	CCDC64	0.330392	2.60203e-12	0.351251	2.59773e-14	✔	✔
ENST00000545067.5	CCDC7	0.304569	1.74289e-10	0.390246	1.01394e-17	✔	✔
ENST00000520509.5	CCNE2	0.322211	1.02833e-11	0.329446	1.32148e-12		✔
ENST00000316355.9	CCNG2	0.367453	2.88229e-15	0.365172	1.79722e-15		✔
ENST00000389879.9	CCNK	0.467138	1.78495e-25	0.314241	1.70334e-11		✔
ENST00000471247.5	CCNL1	0.303399	2.08003e-10	0.457875	8.09136e-25		✔
ENST00000400809.7	CCNL2	0.302047	2.55653e-10	0.474091	9.25612e-27		✔
ENST00000408918.8	CCNL2	0.308943	8.82114e-11	0.458419	6.99048e-25		✔
ENST00000418865.6	CCNL2	0.392718	1.56075e-17	0.60787	3.8242e-47		✔
ENST00000513522.5	CCSER1	0.314932	3.38901e-11	0.314674	1.58693e-11		✔
ENST00000299300.10	CCT2	0.477331	1.03148e-26	0.379665	9.51923e-17		✔
ENST00000368258.7	CCT3	0.382789	1.29413e-16	0.353191	1.80951e-14		✔
ENST00000489870.1	CCT3	0.33509	1.15439e-12	0.375153	2.41698e-16		✔
ENST00000275603.8	CCT6A	0.438126	3.89041e-22	0.347861	4.88567e-14		✔
ENST00000466572.5	CCT6A	0.435194	8.07364e-22	0.498479	7.48129e-30		✔
ENST00000492618.5	CCT6A	0.34206	3.36605e-13	0.366487	1.38946e-15		✔
ENST00000286788.8	CCT8	0.367926	2.62903e-15	0.329613	1.28355e-12		✔
ENST00000325974.8	CCZ1	0.414747	1.1404e-19	0.326841	2.07693e-12		✔
ENST00000309424.7	CD3EAP	0.384797	8.47475e-17	0.398063	1.83589e-18		✔
ENST00000302506.7	CDC25A	0.33291	1.682e-12	0.315348	1.42108e-11		✔
ENST00000560492.1	CDC42BPB	0.316446	2.65251e-11	0.433005	4.98716e-22		✔
ENST00000536241.1	CDCA3	0.337902	7.06877e-13	0.335403	4.68096e-13		✔
ENST00000373055.5	CDCA8	0.312007	5.41609e-11	0.313885	1.8059e-11	✔	✔
ENST00000395284.7	CDK1	0.484372	1.31217e-27	0.364148	2.19869e-15		✔
ENST00000181839.8	CDK13	0.364016	5.643e-15	0.306707	5.69438e-11	✔	✔
ENST00000522234.5	CDK16	0.373919	8.02087e-16	0.381057	7.13793e-17	✔	✔
ENST00000523699.5	CDK16	0.304371	1.79608e-10	0.386813	2.11525e-17	✔	✔
ENST00000266970.8	CDK2	0.360286	1.16726e-14	0.302424	1.114e-10	✔	✔
ENST00000544658.5	CDK2AP1	0.344877	2.03289e-13	0.316314	1.21292e-11		✔
ENST00000406711.5	CEBPZOS	0.342105	3.33775e-13	0.315552	1.37421e-11		✔
ENST00000469862.1	CENPF	0.510989	3.47366e-31	0.347969	4.79042e-14	✔	✔
ENST00000614578.1	CENPF	0.355618	2.81935e-14	0.305124	7.30081e-11	✔	✔
ENST00000281453.9	CENPU	0.474505	2.29174e-26	0.32707	1.99748e-12	✔	✔
ENST00000589993.5	CEP192	0.312975	4.63678e-11	0.367672	1.0969e-15	✔	✔
ENST00000531404.1	CEP295	0.398661	4.39296e-18	0.409104	1.51725e-19		✔
ENST00000531700.5	CEP295	0.413273	1.59724e-19	0.358335	6.77805e-15		✔
ENST00000296519.6	CEP44	0.369831	1.80834e-15	0.361284	3.83689e-15		✔
ENST00000513295.1	CEP63	0.344738	2.08443e-13	0.333443	6.60462e-13		✔
ENST00000514507.1	CEP72	0.307982	1.0248e-10	0.346547	6.21718e-14	✔	✔
ENST00000339839.9	CEP83	0.319879	1.50685e-11	0.326208	2.31127e-12	✔	✔
ENST00000547575.5	CEP83	0.38438	9.27052e-17	0.497872	8.96715e-30	✔	✔
ENST00000453146.1	CEP85	0.328542	3.57428e-12	0.325444	2.63099e-12		✔
ENST00000482825.7	CERS2	0.301716	2.69317e-10	0.417578	2.09057e-20	✔	✔
ENST00000559020.1	CERS2	0.331659	2.09221e-12	0.403749	5.16994e-19	✔	✔
ENST00000557925.1	CERS4	0.340799	4.22834e-13	0.593898	1.34731e-44	✔	✔
ENST00000407816.7	CFAP36	0.367594	2.80461e-15	0.326966	2.03449e-12		✔
ENST00000557429.1	CGRRF1	0.31658	2.59511e-11	0.433093	4.88361e-22		✔
ENST00000618589.1	CH17-373J23.1	0.32386	7.82724e-12	0.405912	3.14798e-19		✔
ENST00000530730.1	CHKA	0.352698	4.88296e-14	0.461048	3.43697e-25		✔
ENST00000533910.5	CHKA	0.328274	3.7416e-12	0.46039	4.11354e-25		✔
ENST00000452668.1	CHKB-CPT1B	0.338711	6.14022e-13	0.468512	4.40103e-26		✔
ENST00000453634.5	CHKB-CPT1B	0.365425	4.27518e-15	0.555777	3.526e-38		✔
ENST00000297265.4	CHMP4C	0.406431	7.67665e-19	0.35436	1.45175e-14		✔
ENST00000320585.10	CHORDC1	0.464485	3.69088e-25	0.321359	5.2578e-12	✔	✔
ENST00000518971.1	CHRAC1	0.30002	3.48727e-10	0.360143	4.79504e-15		✔
ENST00000368686.1	CHTOP	0.340626	4.36533e-13	0.535573	4.26545e-35		✔
ENST00000272402.2	CIAO1	0.338398	6.48164e-13	0.371109	5.5028e-16	✔	✔
ENST00000533413.5	CKAP5	0.326253	5.2542e-12	0.310136	3.29765e-11		✔
ENST00000265593.8	CLCN2	0.321498	1.15772e-11	0.331985	8.51025e-13		✔
ENST00000504131.6	CLCN3	0.355448	2.91124e-14	0.316494	1.17762e-11		✔
ENST00000563642.6	CLCN7	0.307856	1.04532e-10	0.502144	2.43074e-30		✔
ENST00000321356.8	CLK1	0.352288	5.26174e-14	0.348992	3.95864e-14		✔
ENST00000461981.5	CLK1	0.305666	1.47415e-10	0.484802	4.33323e-28		✔
ENST00000484699.1	CLK2	0.336971	8.33479e-13	0.572799	5.97787e-41	✔	✔
ENST00000497188.1	CLK2	0.34638	1.5493e-13	0.58141	2.04106e-42	✔	✔
ENST00000562828.5	CMC2	0.339047	5.78727e-13	0.346121	6.7216e-14	✔	✔
ENST00000421999.6	CMSS1	0.38467	8.7098e-17	0.348424	4.40265e-14	✔	✔
ENST00000475364.1	CMTR1	0.32692	4.6841e-12	0.484896	4.23118e-28		✔
ENST00000502372.1	CNBP	0.329579	2.9882e-12	0.484903	4.22745e-28		✔
ENST00000507573.1	CNBP	0.315589	3.04548e-11	0.450405	5.95156e-24		✔
ENST00000583399.5	CNDP2	0.300658	3.17274e-10	0.326161	2.32873e-12		✔
ENST00000433165.6	CNKSR3	0.379741	2.44397e-16	0.303319	9.68709e-11		✔
ENST00000289382.7	CNOT11	0.346408	1.54187e-13	0.33694	3.56041e-13	✔	✔
ENST00000420107.1	CNOT11	0.366725	3.30985e-15	0.392188	6.66311e-18	✔	✔
ENST00000221232.9	CNOT3	0.302079	2.54373e-10	0.317793	9.51054e-12	✔	✔
ENST00000358389.7	CNOT3	0.305736	1.458e-10	0.42203	7.24304e-21	✔	✔
ENST00000537581.1	COA4	0.312265	5.18996e-11	0.371875	4.69928e-16		✔
ENST00000328709.7	COA5	0.358996	1.48918e-14	0.301617	1.26316e-10		✔
ENST00000530314.5	COG4	0.373102	9.43821e-16	0.503765	1.46912e-30	✔	✔
ENST00000249923.7	COPB1	0.398406	4.63948e-18	0.328548	1.54414e-12	✔	✔
ENST00000357849.8	COPS5	0.476815	1.19097e-26	0.338495	2.69613e-13		✔
ENST00000521386.5	COPS5	0.364394	5.23117e-15	0.529741	3.14856e-34		✔
ENST00000465027.1	COPS6	0.319017	1.7381e-11	0.433587	4.30703e-22	✔	✔
ENST00000555392.1	COQ6	0.33124	2.25031e-12	0.38278	4.96615e-17		✔
ENST00000556588.5	COQ6	0.312212	5.23396e-11	0.450569	5.69582e-24		✔
ENST00000453768.6	CORO1B	0.411261	2.54812e-19	0.624452	3.62091e-50		✔
ENST00000411948.6	COX20	0.32817	3.80858e-12	0.317651	9.73862e-12		✔
ENST00000564811.1	COX5A	0.420143	3.22743e-20	0.363713	2.39381e-15		✔
ENST00000532500.1	CPNE7	0.336607	8.86324e-13	0.445263	2.26776e-23	✔	✔
ENST00000435070.6	CPSF6	0.352732	4.85174e-14	0.398601	1.62785e-18		✔
ENST00000439958.7	CPSF7	0.310352	7.06352e-11	0.348744	4.14461e-14	✔	✔
ENST00000544669.5	CPSF7	0.322698	9.49754e-12	0.461893	2.71721e-25	✔	✔
ENST00000423069.1	CPT1B	0.354431	3.52809e-14	0.561341	4.5589e-39	✔	✔
ENST00000476790.1	CPT1B	0.333015	1.65075e-12	0.526131	1.05924e-33	✔	✔
ENST00000473340.1	CREB3L4	0.315177	3.25884e-11	0.601437	5.51992e-46		✔
ENST00000490820.2	CREBZF	0.35483	3.26918e-14	0.45994	4.64481e-25		✔
ENST00000549356.1	CRY1	0.347863	1.18709e-13	0.333754	6.25095e-13		✔
ENST00000552790.5	CRY1	0.369657	1.86954e-15	0.373764	3.19971e-16		✔
ENST00000546621.5	CS	0.356824	2.23797e-14	0.458851	6.24016e-25		✔
ENST00000262982.2	CSE1L	0.321343	1.18745e-11	0.308194	4.49335e-11	✔	✔
ENST00000578904.1	CSNK1D	0.308124	1.00312e-10	0.475365	6.50241e-27	✔	✔
ENST00000359867.7	CSNK1E	0.322428	9.92567e-12	0.348156	4.62618e-14	✔	✔
ENST00000262210.9	CSPP1	0.33878	6.06693e-13	0.409183	1.48925e-19	✔	✔
ENST00000323959.8	CSTF3	0.342152	3.30999e-13	0.33405	5.94121e-13		✔
ENST00000431742.2	CSTF3	0.306855	1.22365e-10	0.360001	4.92558e-15		✔
ENST00000510568.1	CTBP1	0.321611	1.13678e-11	0.49382	3.05873e-29	✔	✔
ENST00000511907.1	CTBP1	0.367297	2.9691e-15	0.539539	1.09591e-35	✔	✔
ENST00000625256.1	CTBP1-AS	0.383465	1.12287e-16	0.56046	6.39417e-39		✔
ENST00000505364.1	CTBP1-AS2	0.316458	2.64934e-11	0.325326	2.68289e-12		✔
ENST00000599439.2	CTC-338M12.4	0.366841	3.23882e-15	0.488845	1.33353e-28	✔	✔
ENST00000588784.1	CTC-459F4.3	0.327329	4.37753e-12	0.568862	2.65089e-40		✔
ENST00000510585.2	CTC-534A2.2	0.345381	1.85442e-13	0.300617	1.47451e-10		✔
ENST00000595925.1	CTD-2013N24.2	0.309506	8.06878e-11	0.413998	4.84999e-20		✔
ENST00000619862.1	CTD-2270P14.1	0.309034	8.70194e-11	0.528727	4.44589e-34		✔
ENST00000521326.1	CTD-2284J15.1	0.327852	4.01131e-12	0.447853	1.15889e-23		✔
ENST00000528207.1	CTD-2517M22.14	0.391356	2.08875e-17	0.603058	2.69472e-46		✔
ENST00000569326.2	CTD-2517M22.14	0.358733	1.56586e-14	0.606939	5.64987e-47		✔
ENST00000588040.1	CTD-2528L19.6	0.358266	1.70662e-14	0.358641	6.39188e-15		✔
ENST00000597156.1	CTD-3193O13.11	0.376435	4.79016e-16	0.399574	1.31553e-18		✔
ENST00000531014.5	CTNND1	0.322613	9.61948e-12	0.37204	4.55043e-16	✔	✔
ENST00000458100.6	CTNND2	0.359305	1.40672e-14	0.375701	2.16243e-16	✔	✔
ENST00000483662.2	CTTN	0.303975	1.90923e-10	0.493719	3.1561e-29	✔	✔
ENST00000617432.4	CUL3	0.370807	1.49321e-15	0.356136	1.03477e-14		✔
ENST00000621358.4	CWC15	0.489461	2.92874e-28	0.430173	1.00434e-21		✔
ENST00000379687.7	CXorf23	0.304099	1.87177e-10	0.403005	6.09731e-19		✔
ENST00000577368.5	CYB561	0.369869	1.79482e-15	0.557373	1.98408e-38		✔
ENST00000533444.1	CYC1	0.324552	6.96826e-12	0.462856	2.08391e-25	✔	✔
ENST00000452733.6	CYTH2	0.39788	5.20289e-18	0.546933	8.33447e-37	✔	✔
ENST00000600597.1	CYTH2	0.338648	6.20777e-13	0.384747	3.27465e-17	✔	✔
ENST00000411630.6	DANCR	0.419957	3.36211e-20	0.539469	1.11098e-35		✔
ENST00000441504.1	DANCR	0.336441	9.11824e-13	0.503104	1.81135e-30		✔
ENST00000233078.8	DAZAP1	0.386863	5.47452e-17	0.348921	4.00689e-14	✔	✔
ENST00000589484.5	DAZAP1	0.329398	3.07861e-12	0.549395	3.54306e-37	✔	✔
ENST00000431138.5	DBF4	0.441225	1.77556e-22	0.318929	7.87e-12		✔
ENST00000611541.1	DCAF13	0.330355	2.61851e-12	0.455206	1.66351e-24	✔	✔
ENST00000612750.4	DCAF13	0.534116	1.66306e-34	0.381269	6.83141e-17	✔	✔
ENST00000312263.10	DCAF6	0.316369	2.68475e-11	0.305737	6.62868e-11		✔
ENST00000476033.5	DCAF8	0.399657	3.51335e-18	0.520258	7.3569e-33		✔
ENST00000369305.1	DCLRE1A	0.449281	2.1876e-23	0.412219	7.34565e-20		✔
ENST00000550576.1	DCTN2	0.305705	1.46527e-10	0.4044	4.45017e-19		✔
ENST00000260247.9	DCUN1D5	0.375421	5.89636e-16	0.334313	5.67637e-13		✔
ENST00000552740.5	DDIT3	0.369539	1.91121e-15	0.4065	2.75721e-19		✔
ENST00000551098.5	DDX23	0.322923	9.15548e-12	0.441648	5.72331e-23		✔
ENST00000462256.5	DDX39B	0.303475	2.05611e-10	0.561862	3.82376e-39		✔
ENST00000481456.1	DDX39B	0.343431	2.63627e-13	0.550134	2.7909e-37		✔
ENST00000247003.8	DDX49	0.373541	8.6487e-16	0.363947	2.28664e-15		✔
ENST00000581693.5	DDX5	0.37994	2.34553e-16	0.334068	5.92266e-13		✔
ENST00000238146.8	DDX55	0.366522	3.44612e-15	0.457521	8.88103e-25		✔
ENST00000542286.5	DDX55	0.370917	1.46135e-15	0.497454	1.01259e-29		✔
ENST00000421223.5	DDX56	0.335546	1.06438e-12	0.604951	1.2547e-46	✔	✔
ENST00000331314.10	DDX59	0.307226	1.15208e-10	0.313239	2.00329e-11		✔
ENST00000220764.6	DECR1	0.388001	4.29987e-17	0.39862	1.62211e-18	✔	✔
ENST00000574700.5	DERL2	0.349106	9.43189e-14	0.42949	1.19125e-21		✔
ENST00000374059.7	DFNB31	0.33397	1.40079e-12	0.452104	3.80683e-24		✔
ENST00000374185.7	DHDDS	0.45374	6.66878e-24	0.380704	7.66964e-17		✔
ENST00000210060.11	DHPS	0.303326	2.10468e-10	0.36746	1.14442e-15	✔	✔
ENST00000610443.1	DHRS11	0.304406	1.78695e-10	0.480198	1.64908e-27	✔	✔
ENST00000508032.5	DHX15	0.315944	2.88028e-11	0.526078	1.07304e-33	✔	✔
ENST00000441384.5	DHX30	0.369459	1.9403e-15	0.546722	8.94338e-37		✔
ENST00000474183.1	DHX30	0.370174	1.6909e-15	0.517863	1.597e-32		✔
ENST00000479934.5	DHX36	0.35798	1.80272e-14	0.363204	2.64367e-15		✔
ENST00000495598.1	DHX36	0.344118	2.33022e-13	0.360048	4.88448e-15		✔
ENST00000479654.1	DIP2A	0.319066	1.7248e-11	0.421376	8.47571e-21	✔	✔
ENST00000369550.9	DKC1	0.494056	7.32035e-29	0.404134	4.72834e-19		✔
ENST00000280346.10	DLAT	0.35963	1.32117e-14	0.307579	4.95351e-11		✔
ENST00000475394.5	DLG1	0.338769	6.07585e-13	0.3983	1.74253e-18		✔
ENST00000494493.1	DLG3	0.302449	2.40284e-10	0.376211	1.94569e-16		✔
ENST00000454008.6	DMTF1	0.336934	8.38846e-13	0.374942	2.52488e-16	✔	✔
ENST00000488352.2	DMTF1	0.305318	1.55306e-10	0.403987	4.89304e-19	✔	✔
ENST00000298292.12	DNAAF2	0.483307	1.79352e-27	0.449431	7.65822e-24		✔
ENST00000382564.6	DNAJC19	0.338307	6.58385e-13	0.303583	9.30441e-11		✔
ENST00000478723.5	DNAJC19	0.306698	1.25401e-10	0.389607	1.1627e-17		✔
ENST00000379263.7	DNAJC2	0.393055	1.45385e-17	0.35591	1.0799e-14		✔
ENST00000447096.1	DNAJC25	0.372581	1.04884e-15	0.352947	1.89374e-14		✔
ENST00000316603.11	DNAJC7	0.3113	6.0618e-11	0.338727	2.584e-13	✔	✔
ENST00000470967.1	DNAJC8	0.308766	9.06677e-11	0.457734	8.39995e-25		✔
ENST00000014935.7	DNASE1L1	0.310004	7.46015e-11	0.412437	6.98236e-20	✔	✔
ENST00000547640.1	DNM1L	0.326987	4.63437e-12	0.460874	3.59937e-25	✔	✔
ENST00000353855.6	DNMT3B	0.301208	2.91437e-10	0.389313	1.23876e-17		✔
ENST00000423057.6	DOCK4	0.330068	2.74681e-12	0.334466	5.52755e-13		✔
ENST00000486186.5	DOCK4	0.342864	2.9152e-13	0.506602	5.9943e-31		✔
ENST00000454575.5	DOCK7	0.327868	4.001e-12	0.364248	2.15608e-15		✔
ENST00000524666.5	DPF2	0.333373	1.55322e-12	0.504416	1.20175e-30		✔
ENST00000472113.5	DPH7	0.313998	3.94478e-11	0.510042	2.0132e-31	✔	✔
ENST00000485189.5	DPH7	0.302745	2.30003e-10	0.49451	2.49851e-29	✔	✔
ENST00000491359.1	DPH7	0.367207	3.01941e-15	0.537551	2.14139e-35	✔	✔
ENST00000470181.1	DPM2	0.393482	1.33361e-17	0.491868	5.44786e-29	✔	✔
ENST00000295066.3	DPY30	0.423326	1.4948e-20	0.348073	4.69578e-14		✔
ENST00000418664.2	DSP	0.32336	8.523e-12	0.360921	4.12394e-15		✔
ENST00000464603.1	DTYMK	0.343111	2.79184e-13	0.365209	1.78395e-15		✔
ENST00000265720.7	DUS4L	0.413343	1.57416e-19	0.355502	1.16727e-14		✔
ENST00000443233.5	DUS4L	0.325694	5.77175e-12	0.426318	2.57655e-21		✔
ENST00000405954.1	DUSP28	0.300788	3.10829e-10	0.514007	5.61276e-32		✔
ENST00000378891.9	DVL1	0.373634	8.48495e-16	0.46963	3.23851e-26	✔	✔
ENST00000632445.1	DVL1	0.333031	1.6465e-12	0.327325	1.91147e-12	✔	✔
ENST00000442713.6	DYM	0.38005	2.29313e-16	0.374771	2.6083e-16		✔
ENST00000256117.9	E2F5	0.351339	6.27259e-14	0.429379	1.22489e-21		✔
ENST00000416274.6	E2F5	0.323335	8.55755e-12	0.330419	1.11835e-12		✔
ENST00000418930.6	E2F5	0.36638	3.5414e-15	0.31372	1.85426e-11		✔
ENST00000625445.1	EBLN3	0.338465	6.41112e-13	0.362821	2.8468e-15		✔
ENST00000472982.5	EBNA1BP2	0.315044	3.32972e-11	0.468975	3.87678e-26		✔
ENST00000337623.7	EDRF1	0.356072	2.58895e-14	0.376078	1.99924e-16	✔	✔
ENST00000327320.8	EED	0.3595	1.35302e-14	0.423579	4.9901e-21		✔
ENST00000525223.1	EEF1D	0.322981	9.06925e-12	0.485573	3.47081e-28	✔	✔
ENST00000379715.9	EEF1E1	0.41912	4.09671e-20	0.358592	6.45162e-15		✔
ENST00000507463.1	EEF1E1	0.436218	6.30188e-22	0.307549	4.977e-11		✔
ENST00000497282.1	EFNA1	0.325234	6.22317e-12	0.311307	2.73086e-11	✔	✔
ENST00000263991.9	EHBP1	0.327845	4.0142e-12	0.348757	4.13479e-14	✔	✔
ENST00000483653.1	EHMT1	0.30018	3.40534e-10	0.423774	4.75691e-21	✔	✔
ENST00000472926.1	EIF2A	0.315007	3.34828e-11	0.454493	2.01279e-24		✔
ENST00000474505.5	EIF2A	0.418854	4.35435e-20	0.326894	2.05806e-12		✔
ENST00000199389.10	EIF2AK1	0.480663	3.85364e-27	0.367064	1.23932e-15		✔
ENST00000490523.1	EIF2AK1	0.32133	1.18997e-11	0.362305	3.14354e-15		✔
ENST00000560855.5	EIF2AK4	0.312548	4.96994e-11	0.329012	1.4247e-12		✔
ENST00000462749.1	EIF2B4	0.313766	4.0932e-11	0.491757	5.62975e-29		✔
ENST00000475582.5	EIF2B4	0.305228	1.57466e-10	0.582576	1.25225e-42		✔
ENST00000475415.5	EIF3B	0.327804	4.04385e-12	0.536109	3.54921e-35	✔	✔
ENST00000589458.5	EIF3G	0.318662	1.84272e-11	0.399338	1.3873e-18		✔
ENST00000522453.1	EIF3H	0.358244	1.71364e-14	0.314724	1.57373e-11	✔	✔
ENST00000425053.5	EIF4A2	0.313107	4.54249e-11	0.451427	4.55581e-24	✔	✔
ENST00000426808.5	EIF4A2	0.331985	1.97697e-12	0.336196	4.06459e-13	✔	✔
ENST00000485101.5	EIF4A2	0.328994	3.2986e-12	0.561841	3.82376e-39	✔	✔
ENST00000494445.1	EIF4A2	0.370287	1.65544e-15	0.450363	6.01514e-24	✔	✔
ENST00000497177.1	EIF4A2	0.370063	1.72719e-15	0.449603	7.31733e-24	✔	✔
ENST00000515638.5	EIF4E	0.30247	2.39541e-10	0.306791	5.62019e-11	✔	✔
ENST00000409167.7	EIF4E2	0.326941	4.6694e-12	0.350387	3.04719e-14		✔
ENST00000422614.5	EIF4G1	0.312694	4.8516e-11	0.306207	6.1596e-11	✔	✔
ENST00000435046.6	EIF4G1	0.344026	2.36994e-13	0.405661	3.33419e-19	✔	✔
ENST00000532383.5	EIF4G2	0.300304	3.34662e-10	0.424517	3.982e-21		✔
ENST00000534272.1	EIF4G2	0.300956	3.02801e-10	0.319639	6.99925e-12		✔
ENST00000572815.5	EIF5A	0.315832	2.93127e-11	0.404048	4.82423e-19	✔	✔
ENST00000247161.7	ELK1	0.483733	1.58507e-27	0.339165	2.39019e-13		✔
ENST00000220853.7	EMC2	0.463862	4.36394e-25	0.372018	4.57134e-16		✔
ENST00000326237.3	EMC3-AS1	0.336224	9.47113e-13	0.394402	4.10613e-18		✔
ENST00000570069.5	EME2	0.381825	1.58418e-16	0.617893	5.7043e-49		✔
ENST00000273920.7	ENOPH1	0.438791	3.29884e-22	0.373224	3.56915e-16		✔
ENST00000580605.5	ENOSF1	0.327479	4.26522e-12	0.404159	4.70327e-19	✔	✔
ENST00000517350.5	ENY2	0.36381	5.86532e-15	0.512732	8.46137e-32		✔
ENST00000460378.1	EPB41	0.390368	2.59312e-17	0.330194	1.16221e-12	✔	✔
ENST00000263713.9	EPB41L5	0.306209	1.35271e-10	0.355124	1.25607e-14	✔	✔
ENST00000474691.1	EPCAM	0.340076	4.81899e-13	0.404399	4.45017e-19		✔
ENST00000524474.5	EPS8L2	0.310972	6.38844e-11	0.317328	1.02627e-11	✔	✔
ENST00000526909.5	EPS8L2	0.309898	7.58541e-11	0.520996	5.79128e-33	✔	✔
ENST00000529346.5	EPS8L2	0.315261	3.21414e-11	0.478741	2.48468e-27	✔	✔
ENST00000557016.5	ERH	0.610648	4.82218e-47	0.389789	1.11817e-17		✔
ENST00000202816.5	ESF1	0.342808	2.94455e-13	0.304943	7.51298e-11		✔
ENST00000358397.9	ESRP1	0.366168	3.69082e-15	0.387344	1.88712e-17		✔
ENST00000454170.6	ESRP1	0.327915	3.97188e-12	0.311891	2.48781e-11		✔
ENST00000519505.5	ESRP1	0.436092	6.49123e-22	0.422365	6.68365e-21		✔
ENST00000562567.6	ESRP2	0.362148	8.14094e-15	0.565481	9.72185e-40		✔
ENST00000565213.2	ESRP2	0.319134	1.70563e-11	0.474316	8.71959e-27		✔
ENST00000544191.1	ETNK1	0.302093	2.53879e-10	0.394309	4.19095e-18		✔
ENST00000483415.5	EWSR1	0.326453	5.07641e-12	0.454062	2.25689e-24		✔
ENST00000346134.11	EXOC1	0.34841	1.07263e-13	0.406252	2.91462e-19		✔
ENST00000586714.1	EZH1	0.301115	2.95513e-10	0.501117	3.35654e-30		✔
ENST00000460911.5	EZH2	0.311854	5.55411e-11	0.375406	2.29719e-16		✔
ENST00000492143.5	EZH2	0.307276	1.14369e-10	0.427418	1.96898e-21		✔
ENST00000445716.5	FAM133B	0.369507	1.92246e-15	0.32651	2.19729e-12		✔
ENST00000481407.5	FAM133B	0.306031	1.39137e-10	0.362765	2.87823e-15		✔
ENST00000306320.9	FAM134B	0.328748	3.44492e-12	0.303462	9.4743e-11	✔	✔
ENST00000282226.4	FAM151B	0.322651	9.56368e-12	0.302154	1.16252e-10		✔
ENST00000469967.1	FAM162A	0.487536	5.18033e-28	0.398669	1.60621e-18		✔
ENST00000619674.1	FAM195A	0.365743	4.01503e-15	0.492939	3.9764e-29		✔
ENST00000322940.10	FAM206A	0.412303	2.01228e-19	0.323253	3.81318e-12		✔
ENST00000485156.1	FAM208A	0.502822	4.82697e-30	0.40031	1.11621e-18	✔	✔
ENST00000614531.1	FAM208A	0.332837	1.70309e-12	0.32596	2.40834e-12	✔	✔
ENST00000566894.1	FAM219B	0.310001	7.46192e-11	0.48976	1.01391e-28	✔	✔
ENST00000250056.12	FAM64A	0.366382	3.54114e-15	0.338136	2.87662e-13		✔
ENST00000439290.5	FAM73B	0.300188	3.40161e-10	0.525105	1.48515e-33	✔	✔
ENST00000388913.3	FAM83H	0.426343	7.22501e-21	0.361101	3.97992e-15		✔
ENST00000533004.5	FAM83H-AS1	0.472468	4.04862e-26	0.523464	2.55566e-33		✔
ENST00000304916.3	FAM84B	0.338531	6.34092e-13	0.387831	1.7024e-17	✔	✔
ENST00000517458.1	FAM84B	0.359933	1.24714e-14	0.317652	9.73782e-12	✔	✔
ENST00000316409.2	FAM89B	0.401806	2.17763e-18	0.350776	2.83728e-14		✔
ENST00000557835.5	FAM96A	0.368459	2.36861e-15	0.450971	5.13606e-24		✔
ENST00000586372.5	FAM98C	0.342836	2.92912e-13	0.494294	2.65526e-29		✔
ENST00000289081.7	FANCC	0.306203	1.35372e-10	0.308049	4.59964e-11		✔
ENST00000470028.1	FANCD2	0.341329	3.841e-13	0.333537	6.49749e-13	✔	✔
ENST00000233741.8	FANCL	0.308015	1.01969e-10	0.344304	9.38296e-14		✔
ENST00000470506.1	FANCL	0.304382	1.7936e-10	0.323743	3.51081e-12		✔
ENST00000554809.5	FANCM	0.349342	9.04013e-14	0.322381	4.42128e-12		✔
ENST00000532502.1	FAR1	0.320531	1.35516e-11	0.416491	2.69546e-20	✔	✔
ENST00000578424.1	FASN	0.317451	2.24391e-11	0.370422	6.31569e-16	✔	✔
ENST00000580382.1	FASN	0.339787	5.07003e-13	0.343454	1.09731e-13	✔	✔
ENST00000467237.5	FASTK	0.368585	2.31386e-15	0.573186	5.315e-41	✔	✔
ENST00000453153.6	FASTKD1	0.306199	1.3543e-10	0.33421	5.77756e-13		✔
ENST00000264669.9	FASTKD3	0.40927	4.01663e-19	0.416042	2.99694e-20		✔
ENST00000500085.2	FAT1	0.415123	1.04164e-19	0.322247	4.52212e-12	✔	✔
ENST00000507105.1	FAT1	0.341265	3.88477e-13	0.344692	8.73764e-14	✔	✔
ENST00000524492.5	FBXL6	0.34317	2.76214e-13	0.476466	4.75597e-27		✔
ENST00000518148.1	FBXL8	0.329616	2.96979e-12	0.566995	5.55038e-40		✔
ENST00000317683.3	FBXO46	0.350164	7.79302e-14	0.407537	2.17709e-19	✔	✔
ENST00000477822.2	FBXO5	0.33638	9.20974e-13	0.388822	1.37772e-17		✔
ENST00000480463.6	FBXO9	0.328256	3.75153e-12	0.41631	2.81728e-20		✔
ENST00000398484.6	FGFRL1	0.302061	2.55085e-10	0.470136	2.81362e-26		✔
ENST00000466788.1	FHIT	0.308847	8.95458e-11	0.546097	1.10143e-36	✔	✔
ENST00000511055.1	FIP1L1	0.304108	1.86987e-10	0.500389	4.16881e-30		✔
ENST00000590714.1	FIZ1	0.340675	4.32762e-13	0.444773	2.57094e-23	✔	✔
ENST00000396062.3	FKBP3	0.434853	8.79587e-22	0.347861	4.88567e-14	✔	✔
ENST00000556231.1	FKBP3	0.395681	8.34439e-18	0.565924	8.3574e-40	✔	✔
ENST00000538622.1	FKBP4	0.336184	9.53855e-13	0.379553	9.74454e-17	✔	✔
ENST00000540260.1	FKBP4	0.364089	5.56337e-15	0.508604	3.19552e-31	✔	✔
ENST00000543037.1	FKBP4	0.321015	1.25424e-11	0.355101	1.2607e-14	✔	✔
ENST00000368433.5	FLAD1	0.334279	1.32697e-12	0.47689	4.19531e-27		✔
ENST00000468939.1	FLNB	0.303562	2.03052e-10	0.348582	4.27579e-14	✔	✔
ENST00000475487.1	FLNB	0.35058	7.22237e-14	0.376435	1.85746e-16	✔	✔
ENST00000525099.1	FNTA	0.351253	6.37697e-14	0.520971	5.82651e-33		✔
ENST00000250448.2	FOXA1	0.48488	1.12786e-27	0.458496	6.84382e-25		✔
ENST00000557418.1	FOXA1	0.360051	1.22208e-14	0.394225	4.26965e-18		✔
ENST00000372573.5	FOXJ3	0.309288	8.35915e-11	0.312662	2.19641e-11		✔
ENST00000359843.7	FOXM1	0.366028	3.79212e-15	0.319648	6.98943e-12		✔
ENST00000397224.8	FOXRED2	0.342173	3.30114e-13	0.340431	1.90066e-13		✔
ENST00000370768.6	FUBP1	0.427807	5.05622e-21	0.354243	1.48431e-14		✔
ENST00000380244.7	FUS	0.479897	4.83889e-27	0.346377	6.40867e-14	✔	✔
ENST00000476672.1	FXR1	0.354429	3.52809e-14	0.348199	4.58909e-14		✔
ENST00000585962.1	G6PC3	0.305813	1.43988e-10	0.472348	1.51408e-26		✔
ENST00000619314.1	GABPB1-AS1	0.312905	4.68919e-11	0.385062	3.06711e-17		✔
ENST00000470383.1	GALE	0.364475	5.14827e-15	0.47785	3.22302e-27		✔
ENST00000430044.6	GALNT11	0.349829	8.30442e-14	0.313617	1.88442e-11		✔
ENST00000526732.5	GANAB	0.311773	5.62868e-11	0.479209	2.17837e-27	✔	✔
ENST00000226796.6	GAR1	0.428509	4.25836e-21	0.402689	6.54269e-19	✔	✔
ENST00000389266.7	GARS	0.366199	3.67197e-15	0.308606	4.20718e-11		✔
ENST00000361093.9	GART	0.360698	1.07818e-14	0.360326	4.62908e-15		✔
ENST00000421068.5	GAS5	0.392286	1.71017e-17	0.464122	1.47802e-25		✔
ENST00000422183.5	GAS5	0.346491	1.52021e-13	0.333397	6.65916e-13		✔
ENST00000431268.5	GAS5	0.317968	2.06345e-11	0.48836	1.53959e-28		✔
ENST00000436656.5	GAS5	0.335313	1.10835e-12	0.34303	1.18605e-13		✔
ENST00000442067.5	GAS5	0.340611	4.37535e-13	0.484796	4.33625e-28		✔
ENST00000443799.5	GAS5	0.358636	1.59473e-14	0.443613	3.47126e-23		✔
ENST00000456293.5	GAS5	0.369804	1.81627e-15	0.373517	3.36488e-16		✔
ENST00000341105.6	GATA2	0.368208	2.4875e-15	0.332922	7.23373e-13		✔
ENST00000487848.5	GATA2	0.36977	1.82778e-15	0.385646	2.7087e-17		✔
ENST00000287957.3	GATAD1	0.342381	3.17927e-13	0.338026	2.93371e-13		✔
ENST00000322090.7	GBAS	0.370318	1.64541e-15	0.353942	1.57022e-14		✔
ENST00000585420.5	GCDH	0.300003	3.49575e-10	0.499059	6.24504e-30		✔
ENST00000460984.1	GDI1	0.340129	4.77692e-13	0.313296	1.98632e-11		✔
ENST00000489589.1	GDI1	0.325486	5.96601e-12	0.45831	7.20108e-25		✔
ENST00000491154.1	GDI1	0.325963	5.51623e-12	0.504716	1.09525e-30		✔
ENST00000581140.5	GDPD1	0.370741	1.51151e-15	0.312446	2.27531e-11		✔
ENST00000613421.4	GGA3	0.310519	6.87443e-11	0.466948	6.77963e-26	✔	✔
ENST00000275428.8	GGCT	0.466951	1.86146e-25	0.405431	3.51632e-19		✔
ENST00000482013.1	GGPS1	0.354292	3.62136e-14	0.355175	1.24358e-14		✔
ENST00000489692.1	GGPS1	0.368875	2.18299e-15	0.366802	1.30477e-15		✔
ENST00000491634.1	GKAP1	0.32326	8.66365e-12	0.46304	1.97813e-25		✔
ENST00000487058.1	GLUD1	0.313597	4.20694e-11	0.359088	5.86557e-15	✔	✔
ENST00000282570.3	GMCL1	0.380489	2.09174e-16	0.30955	3.62017e-11	✔	✔
ENST00000355299.8	GMPR2	0.323305	8.60165e-12	0.313683	1.86535e-11		✔
ENST00000559606.1	GMPR2	0.322845	9.27428e-12	0.38503	3.08769e-17		✔
ENST00000476196.5	GNAS	0.334669	1.23971e-12	0.419778	1.24072e-20	✔	✔
ENST00000479025.1	GNAS	0.312465	5.03452e-11	0.427236	2.05722e-21	✔	✔
ENST00000487862.5	GNAS	0.344776	2.06997e-13	0.425999	2.77736e-21	✔	✔
ENST00000480159.1	GNB2	0.360337	1.15594e-14	0.553106	9.50154e-38		✔
ENST00000502844.5	GNB2L1	0.314708	3.51207e-11	0.465991	8.80016e-26		✔
ENST00000513060.5	GNB2L1	0.34992	8.16121e-14	0.532203	1.34414e-34		✔
ENST00000514183.5	GNB2L1	0.336242	9.44267e-13	0.552737	1.08384e-37		✔
ENST00000373062.7	GNL2	0.561293	1.188e-38	0.421922	7.43156e-21		✔
ENST00000418458.5	GNL3	0.53337	2.13391e-34	0.48741	2.01828e-28	✔	✔
ENST00000492349.5	GNL3	0.347338	1.30393e-13	0.455123	1.70216e-24	✔	✔
ENST00000496254.5	GNL3	0.422048	2.0485e-20	0.592222	2.57406e-44	✔	✔
ENST00000497356.1	GNL3	0.489	3.37987e-28	0.640844	2.17151e-53	✔	✔
ENST00000216410.7	GNPNAT1	0.30666	1.26029e-10	0.382625	5.1293e-17		✔
ENST00000490257.5	GOLGA2	0.339093	5.74359e-13	0.50318	1.77243e-30	✔	✔
ENST00000361924.6	GOLGA4	0.328259	3.75095e-12	0.318796	8.04961e-12		✔
ENST00000265070.6	GOLPH3	0.475882	1.56554e-26	0.363578	2.45762e-15	✔	✔
ENST00000527653.1	GPAA1	0.316101	2.80706e-11	0.451381	4.6061e-24		✔
ENST00000532758.5	GPAA1	0.355112	3.09609e-14	0.483374	6.55622e-28		✔
ENST00000309096.4	GPBP1	0.390168	2.70605e-17	0.479079	2.25342e-27		✔
ENST00000292377.3	GPC2	0.356926	2.19446e-14	0.327527	1.84604e-12	✔	✔
ENST00000478722.5	GPHN	0.326735	4.8357e-12	0.332309	8.05175e-13		✔
ENST00000536667.5	GPR137	0.319083	1.72023e-11	0.361841	3.44591e-15		✔
ENST00000321662.10	GPR137C	0.387855	4.43353e-17	0.308642	4.18314e-11		✔
ENST00000482813.5	GPR160	0.398542	4.50744e-18	0.375065	2.46017e-16		✔
ENST00000392357.1	GPS1	0.340114	4.78903e-13	0.609832	2.37581e-47		✔
ENST00000583983.1	GPS1	0.335475	1.07784e-12	0.479908	1.7788e-27		✔
ENST00000251808.7	GRHL2	0.335804	1.02016e-12	0.392391	6.37352e-18	✔	✔
ENST00000525513.1	GRINA	0.325522	5.9341e-12	0.381696	6.2496e-17		✔
ENST00000533377.1	GRINA	0.359979	1.23702e-14	0.374169	2.94955e-16		✔
ENST00000534791.5	GRINA	0.346517	1.51289e-13	0.39207	6.8338e-18		✔
ENST00000505068.5	GRSF1	0.35131	6.30744e-14	0.497699	9.41389e-30		✔
ENST00000396064.7	GTF2A2	0.467449	1.63915e-25	0.342561	1.29004e-13		✔
ENST00000480263.1	GTPBP2	0.329279	3.14094e-12	0.449428	7.66005e-24		✔
ENST00000324894.12	GTPBP3	0.320829	1.29186e-11	0.320115	6.46702e-12		✔
ENST00000454366.1	GTSE1	0.473751	2.84887e-26	0.31599	1.27848e-11	✔	✔
ENST00000340857.3	H1F0	0.358288	1.69968e-14	0.31298	2.08831e-11	✔	✔
ENST00000446531.1	H2AFV	0.322826	9.30008e-12	0.514458	4.83643e-32		✔
ENST00000360597.8	H2AFY	0.306489	1.29408e-10	0.321669	4.98896e-12	✔	✔
ENST00000511494.5	H2AFY	0.370272	1.65917e-15	0.539469	1.11098e-35	✔	✔
ENST00000443786.2	HAUS3	0.397974	5.10025e-18	0.386208	2.40382e-17		✔
ENST00000506763.5	HAUS3	0.308664	9.21539e-11	0.355076	1.26707e-14		✔
ENST00000471488.1	HDAC1	0.338722	6.12845e-13	0.391337	8.01848e-18		✔
ENST00000476391.5	HDAC1	0.327357	4.35753e-12	0.480981	1.31852e-27		✔
ENST00000475965.1	HDAC10	0.318574	1.86874e-11	0.468633	4.25242e-26		✔
ENST00000470482.5	HDLBP	0.32013	1.44589e-11	0.314584	1.60981e-11	✔	✔
ENST00000367697.7	HEBP2	0.376759	4.48061e-16	0.320865	5.70833e-12		✔
ENST00000607197.5	HEBP2	0.347639	1.23522e-13	0.318274	8.77917e-12		✔
ENST00000549141.1	HECTD4	0.359443	1.3684e-14	0.30697	5.46074e-11		✔
ENST00000371327.2	HELLS	0.420669	2.84346e-20	0.309021	3.93981e-11	✔	✔
ENST00000528584.5	HERC2P9	0.305899	1.42051e-10	0.470419	2.59873e-26		✔
ENST00000264345.7	HERC3	0.431909	1.83422e-21	0.343202	1.15022e-13		✔
ENST00000533266.5	HGH1	0.304627	1.72779e-10	0.301075	1.37353e-10		✔
ENST00000528902.1	HID1	0.348379	1.07872e-13	0.595878	5.81846e-45	✔	✔
ENST00000532894.1	HID1	0.30134	2.85675e-10	0.52399	2.17987e-33	✔	✔
ENST00000377401.3	HIST1H2BL	0.300197	3.39815e-10	0.340834	1.76616e-13		✔
ENST00000606613.1	HIST1H2BN	0.352424	5.13744e-14	0.415852	3.1343e-20		✔
ENST00000612898.1	HIST1H2BN	0.305403	1.53426e-10	0.465289	1.06942e-25		✔
ENST00000615353.1	HIST1H4I	0.370229	1.67271e-15	0.406264	2.9073e-19		✔
ENST00000379388.6	HIVEP1	0.331284	2.23537e-12	0.320664	5.90318e-12		✔
ENST00000399469.2	HIVEP1	0.413375	1.56319e-19	0.47098	2.22846e-26		✔
ENST00000411486.6	HJURP	0.412211	2.05246e-19	0.355827	1.09692e-14		✔
ENST00000326004.4	HMGB1	0.411788	2.26118e-19	0.313497	1.92257e-11		✔
ENST00000490788.1	HMGB1	0.371135	1.40242e-15	0.436823	1.91907e-22		✔
ENST00000255320.6	HMGB1P5	0.334725	1.22785e-12	0.334029	5.96184e-13		✔
ENST00000511316.1	HMGB2	0.322662	9.55084e-12	0.349926	3.32084e-14		✔
ENST00000513318.1	HMGXB3	0.327021	4.61152e-12	0.462843	2.08891e-25	✔	✔
ENST00000570646.5	HMOX2	0.33861	6.25188e-13	0.339247	2.3541e-13		✔
ENST00000581874.1	HN1	0.402151	2.01304e-18	0.35827	6.86483e-15	✔	✔
ENST00000546500.5	HNRNPA1	0.425753	8.33639e-21	0.59291	1.93805e-44		✔
ENST00000356674.7	HNRNPA2B1	0.844928	2.96185e-130	0.480622	1.46573e-27	✔	✔
ENST00000360787.8	HNRNPA2B1	0.495379	4.89852e-29	0.413272	5.7479e-20	✔	✔
ENST00000463181.5	HNRNPA2B1	0.371582	1.28154e-15	0.518741	1.20655e-32	✔	✔
ENST00000490912.5	HNRNPA2B1	0.337346	7.79089e-13	0.362821	2.8468e-15	✔	✔
ENST00000495810.1	HNRNPA2B1	0.325182	6.27443e-12	0.34677	5.97081e-14	✔	✔
ENST00000618183.4	HNRNPA2B1	0.318523	1.88442e-11	0.345072	8.16037e-14	✔	✔
ENST00000435711.5	HNRNPA3	0.354853	3.25624e-14	0.317348	1.02322e-11	✔	✔
ENST00000355836.9	HNRNPAB	0.512555	2.08248e-31	0.387787	1.71834e-17	✔	✔
ENST00000554969.5	HNRNPC	0.353207	4.43402e-14	0.409814	1.28552e-19	✔	✔
ENST00000555585.5	HNRNPC	0.322741	9.4324e-12	0.421176	8.89357e-21	✔	✔
ENST00000556897.5	HNRNPC	0.304769	1.69096e-10	0.372239	4.37292e-16	✔	✔
ENST00000557768.1	HNRNPC	0.320715	1.31629e-11	0.339729	2.15746e-13	✔	✔
ENST00000456056.1	HNRNPCP7	0.313648	4.17225e-11	0.408243	1.84858e-19		✔
ENST00000508119.5	HNRNPD	0.352322	5.23379e-14	0.492702	4.26716e-29	✔	✔
ENST00000513584.1	HNRNPD	0.313142	4.51966e-11	0.331017	1.0086e-12	✔	✔
ENST00000514325.1	HNRNPD	0.331911	2.00232e-12	0.509622	2.31293e-31	✔	✔
ENST00000349655.8	HNRNPDL	0.448554	2.64798e-23	0.492143	5.01586e-29	✔	✔
ENST00000502762.4	HNRNPDL	0.33005	2.75526e-12	0.393434	5.07166e-18	✔	✔
ENST00000507721.5	HNRNPDL	0.332929	1.67656e-12	0.528558	4.69774e-34	✔	✔
ENST00000337970.7	HNRNPF	0.343204	2.74571e-13	0.302509	1.0992e-10	✔	✔
ENST00000356053.7	HNRNPF	0.330713	2.46143e-12	0.300413	1.52214e-10	✔	✔
ENST00000442819.6	HNRNPH1	0.341274	3.87904e-13	0.305175	7.24307e-11	✔	✔
ENST00000502904.5	HNRNPH1	0.328143	3.82347e-12	0.52238	3.6742e-33	✔	✔
ENST00000504549.5	HNRNPH1	0.324084	7.53152e-12	0.456246	1.257e-24	✔	✔
ENST00000376281.8	HNRNPK	0.524939	3.55722e-33	0.366255	1.45366e-15	✔	✔
ENST00000481820.6	HNRNPK	0.392934	1.49e-17	0.534212	6.72331e-35	✔	✔
ENST00000483135.1	HNRNPK	0.30353	2.0393e-10	0.394182	4.30826e-18	✔	✔
ENST00000492865.1	HNRNPK	0.572397	2.12274e-40	0.451398	4.58743e-24	✔	✔
ENST00000493362.1	HNRNPK	0.388666	3.74227e-17	0.472473	1.46061e-26	✔	✔
ENST00000600873.5	HNRNPL	0.34675	1.45148e-13	0.332388	7.94329e-13	✔	✔
ENST00000540127.1	HNRNPUL2	0.32485	6.62838e-12	0.391975	6.97792e-18		✔
ENST00000394331.3	HOXC6	0.355907	2.67034e-14	0.364065	2.23449e-15		✔
ENST00000515235.6	HSD17B4	0.325257	6.20253e-12	0.46258	2.24636e-25	✔	✔
ENST00000532338.5	HSF1	0.349884	8.21796e-14	0.553224	9.13264e-38		✔
ENST00000548622.1	HSP90B1	0.327768	4.06509e-12	0.396503	2.58308e-18		✔
ENST00000551983.1	HSP90B1	0.372553	1.05471e-15	0.465899	9.02201e-26		✔
ENST00000378372.7	HSPA14	0.390504	2.52221e-17	0.334225	5.762e-13		✔
ENST00000524552.5	HSPA8	0.408501	4.80996e-19	0.304057	8.64265e-11	✔	✔
ENST00000527983.5	HSPA8	0.415887	8.73922e-20	0.474397	8.5334e-27	✔	✔
ENST00000532091.1	HSPA8	0.3003	3.34784e-10	0.339505	2.24668e-13	✔	✔
ENST00000297185.7	HSPA9	0.465524	2.76729e-25	0.319623	7.01922e-12		✔
ENST00000512328.1	HSPA9	0.301965	2.59015e-10	0.30561	6.7616e-11		✔
ENST00000524109.1	HSPA9	0.3655	4.21185e-15	0.512333	9.61758e-32		✔
ENST00000388968.7	HSPD1	0.360224	1.18082e-14	0.364864	1.90975e-15		✔
ENST00000482167.1	HSPD1	0.350987	6.70938e-14	0.442354	4.76873e-23		✔
ENST00000491249.1	HSPD1	0.354588	3.42223e-14	0.484818	4.32092e-28		✔
ENST00000409468.1	HSPE1	0.582549	4.51442e-42	0.465865	9.10503e-26		✔
ENST00000463841.1	HSPE1	0.468284	1.29736e-25	0.484809	4.32873e-28		✔
ENST00000473395.1	HSPE1	0.430469	2.61517e-21	0.395145	3.49152e-18		✔
ENST00000258080.7	HTRA2	0.302443	2.40477e-10	0.423385	5.22633e-21		✔
ENST00000463852.1	HUWE1	0.353478	4.21517e-14	0.440808	7.06391e-23		✔
ENST00000425380.6	HYLS1	0.317491	2.23073e-11	0.327478	1.86189e-12		✔
ENST00000375627.1	IARS	0.331103	2.30435e-12	0.361695	3.54752e-15		✔
ENST00000447699.6	IARS	0.365967	3.83933e-15	0.439804	9.11186e-23		✔
ENST00000445419.6	IBTK	0.324206	7.38054e-12	0.336794	3.65318e-13		✔
ENST00000401396.5	ICA1	0.366147	3.70566e-15	0.321033	5.55149e-12	✔	✔
ENST00000455539.5	ICA1	0.323022	9.00623e-12	0.400255	1.12911e-18	✔	✔
ENST00000470696.1	ICA1	0.354044	3.7892e-14	0.590275	5.7172e-44	✔	✔
ENST00000490041.1	ICA1	0.307237	1.15016e-10	0.527098	7.66397e-34	✔	✔
ENST00000506561.5	IDUA	0.354114	3.74078e-14	0.492603	4.36818e-29		✔
ENST00000514224.1	IDUA	0.311628	5.76271e-11	0.437172	1.76107e-22		✔
ENST00000403825.7	IFRD1	0.312485	5.01918e-11	0.341841	1.47055e-13		✔
ENST00000421296.1	IFRD1	0.335672	1.0422e-12	0.394885	3.693e-18		✔
ENST00000380062.9	IFT74	0.307982	1.0248e-10	0.320071	6.51436e-12	✔	✔
ENST00000493195.5	IGSF9	0.305351	1.54549e-10	0.490936	7.14481e-29	✔	✔
ENST00000465794.1	IL17RC	0.330675	2.47691e-12	0.310163	3.28532e-11		✔
ENST00000361891.8	ILF2	0.348105	1.13524e-13	0.312649	2.20108e-11		✔
ENST00000407004.7	ILF3	0.383828	1.04145e-16	0.317637	9.76162e-12		✔
ENST00000587928.5	ILF3	0.37752	3.84785e-16	0.548191	5.3005e-37		✔
ENST00000590261.5	ILF3	0.364214	5.42469e-15	0.313687	1.86415e-11		✔
ENST00000256108.9	IMPA1	0.389994	2.80467e-17	0.406001	3.08616e-19		✔
ENST00000520065.1	IMPA1	0.363094	6.76667e-15	0.46982	3.07076e-26		✔
ENST00000485500.1	IMPDH2	0.325191	6.26571e-12	0.485225	3.83936e-28	✔	✔
ENST00000496837.1	IMPDH2	0.308648	9.2365e-11	0.433761	4.13057e-22	✔	✔
ENST00000445699.5	ING3	0.320587	1.34294e-11	0.437714	1.54542e-22		✔
ENST00000545355.5	INPPL1	0.433483	1.24817e-21	0.511278	1.35117e-31	✔	✔
ENST00000519736.5	INTS8	0.389663	3.00539e-17	0.418979	1.50175e-20		✔
ENST00000520526.5	INTS8	0.458947	1.64423e-24	0.326217	2.30798e-12		✔
ENST00000523731.5	INTS8	0.507622	1.04344e-30	0.311434	2.67694e-11		✔
ENST00000310864.10	IQCB1	0.312426	5.06553e-11	0.33906	2.43484e-13		✔
ENST00000361170.6	IQGAP3	0.419768	3.51161e-20	0.345885	7.02722e-14	✔	✔
ENST00000554721.1	JKAMP	0.305883	1.42421e-10	0.4014	8.71634e-19		✔
ENST00000327520.7	JMJD1C	0.374055	7.79947e-16	0.369672	7.35345e-16	✔	✔
ENST00000414209.5	JPX	0.36604	3.78452e-15	0.363892	2.31092e-15	✔	✔
ENST00000560915.1	KATNBL1	0.300862	3.0723e-10	0.429725	1.12432e-21		✔
ENST00000501016.2	KB-1208A12.3	0.315179	3.25812e-11	0.327885	1.73441e-12		✔
ENST00000308768.9	KCTD13	0.383665	1.07766e-16	0.442703	4.37512e-23		✔
ENST00000454368.2	KDELR2	0.316689	2.54771e-11	0.455256	1.64125e-24		✔
ENST00000611640.4	KDM4B	0.303919	1.92521e-10	0.384854	3.20359e-17	✔	✔
ENST00000472822.5	KDM5B	0.315034	3.33468e-11	0.429208	1.27517e-21	✔	✔
ENST00000594496.5	KHSRP	0.365669	4.07064e-15	0.367964	1.03506e-15		✔
ENST00000625619.1	KIAA0101	0.418821	4.38591e-20	0.302093	1.17314e-10		✔
ENST00000506775.1	KIAA0141	0.406919	6.85692e-19	0.320557	6.01233e-12		✔
ENST00000368320.7	KIAA0907	0.389762	2.94982e-17	0.607988	3.81667e-47	✔	✔
ENST00000368321.7	KIAA0907	0.418373	4.87436e-20	0.416726	2.54863e-20	✔	✔
ENST00000465953.1	KIAA0907	0.33035	2.62042e-12	0.469544	3.31708e-26	✔	✔
ENST00000306802.8	KIAA1109	0.332097	1.9383e-12	0.316207	1.23362e-11		✔
ENST00000378746.8	KIF3A	0.363104	6.75557e-15	0.352941	1.89501e-14		✔
ENST00000374403.3	KIF4A	0.45467	5.22491e-24	0.318739	8.12703e-12		✔
ENST00000428849.6	KIFC1	0.41998	3.34907e-20	0.319179	7.55501e-12		✔
ENST00000529644.1	KIFC2	0.392963	1.48294e-17	0.547672	6.3722e-37	✔	✔
ENST00000533114.1	KIFC2	0.384954	8.21126e-17	0.573105	5.39396e-41	✔	✔
ENST00000379562.8	KIN	0.348956	9.6968e-14	0.386886	2.08323e-17		✔
ENST00000475757.2	KLC2	0.305612	1.48694e-10	0.428425	1.54258e-21	✔	✔
ENST00000471613.1	KLHDC9	0.352886	4.71562e-14	0.544694	1.79265e-36		✔
ENST00000463212.1	KLHL17	0.329929	2.81376e-12	0.461078	3.41485e-25		✔
ENST00000481067.1	KLHL17	0.307512	1.10306e-10	0.451664	4.27798e-24		✔
ENST00000622660.1	KLHL17	0.346691	1.46567e-13	0.438139	1.38967e-22		✔
ENST00000594174.5	KLK2	0.322678	9.52781e-12	0.527056	7.75635e-34		✔
ENST00000595375.5	KLK2	0.362352	7.81521e-15	0.609504	2.38288e-47		✔
ENST00000597727.5	KLK2	0.326567	4.97821e-12	0.61863	4.95797e-49		✔
ENST00000599568.1	KLK2	0.348495	1.0557e-13	0.598463	1.89889e-45		✔
ENST00000360104.7	KMT2C	0.383824	1.04174e-16	0.42377	4.75996e-21	✔	✔
ENST00000526209.1	KMT2D	0.323363	8.52099e-12	0.397231	2.2039e-18		✔
ENST00000565844.1	KNOP1	0.303375	2.08797e-10	0.34681	5.92916e-14	✔	✔
ENST00000608100.5	KNSTRN	0.471845	4.81151e-26	0.378811	1.13712e-16		✔
ENST00000436959.7	KNTC1	0.34664	1.47956e-13	0.339223	2.36436e-13		✔
ENST00000290158.8	KPNB1	0.537542	5.25695e-35	0.356275	1.00748e-14		✔
ENST00000580158.1	KPNB1	0.501874	6.5259e-30	0.41085	1.0116e-19		✔
ENST00000340022.6	KRIT1	0.356494	2.38172e-14	0.339529	2.23677e-13	✔	✔
ENST00000475770.5	KRIT1	0.313878	4.01993e-11	0.34035	1.92836e-13	✔	✔
ENST00000388835.3	KRT18	0.304566	1.74317e-10	0.455332	1.60947e-24	✔	✔
ENST00000382171.2	KRTAP5-1	0.357524	1.96017e-14	0.361504	3.67678e-15		✔
ENST00000554831.1	KTN1	0.309279	8.36981e-11	0.457141	9.86211e-25	✔	✔
ENST00000267436.8	L2HGDH	0.303151	2.16129e-10	0.369468	7.65699e-16		✔
ENST00000421284.7	L2HGDH	0.312004	5.41747e-11	0.303323	9.6804e-11		✔
ENST00000481608.1	L3HYPDH	0.351789	5.77863e-14	0.501981	2.5433e-30		✔
ENST00000361794.6	L3MBTL3	0.31513	3.28273e-11	0.359376	5.54659e-15		✔
ENST00000326639.10	LARP1B	0.388612	3.78109e-17	0.402768	6.42655e-19	✔	✔
ENST00000394288.7	LARP1B	0.415809	8.88389e-20	0.379613	9.62241e-17	✔	✔
ENST00000432347.6	LARP1B	0.30609	1.37853e-10	0.325616	2.55456e-12	✔	✔
ENST00000511529.1	LARP7	0.333654	1.48028e-12	0.333095	7.02224e-13		✔
ENST00000274562.13	LARS	0.305817	1.43926e-10	0.326489	2.20457e-12		✔
ENST00000506231.5	LARS	0.310988	6.37184e-11	0.48933	1.15967e-28		✔
ENST00000431002.6	LBHD1	0.311519	5.85709e-11	0.556817	2.45726e-38		✔
ENST00000299601.9	LEO1	0.378006	3.47833e-16	0.338867	2.52005e-13		✔
ENST00000547008.5	LETMD1	0.312522	4.99127e-11	0.326887	2.06018e-12		✔
ENST00000623495.1	LETMD1	0.312301	5.16186e-11	0.519454	9.51339e-33		✔
ENST00000389858.4	LGR4	0.337661	7.37437e-13	0.315532	1.37843e-11		✔
ENST00000378526.8	LIG3	0.417965	5.368e-20	0.526108	1.06452e-33		✔
ENST00000473798.1	LINC00115	0.312992	4.62591e-11	0.551288	1.84951e-37		✔
ENST00000585356.5	LINC00665	0.312022	5.40266e-11	0.404977	3.90334e-19		✔
ENST00000591372.1	LINC00665	0.502931	4.67448e-30	0.409599	1.35298e-19		✔
ENST00000441359.1	LINC00998	0.335418	1.08847e-12	0.359896	5.02972e-15		✔
ENST00000499203.6	LINC01024	0.342194	3.28868e-13	0.302107	1.17072e-10		✔
ENST00000577500.5	LLGL2	0.318678	1.83883e-11	0.552832	1.05106e-37	✔	✔
ENST00000542587.5	LPAR2	0.303522	2.04108e-10	0.441048	6.6449e-23		✔
ENST00000503716.5	LRBA	0.372409	1.08405e-15	0.414948	3.87915e-20	✔	✔
ENST00000510157.1	LRBA	0.312302	5.16184e-11	0.374383	2.82271e-16	✔	✔
ENST00000528528.1	LRRC14	0.324612	6.89607e-12	0.534779	5.53219e-35		✔
ENST00000412831.1	LRRC37BP1	0.34352	2.5972e-13	0.342858	1.22446e-13		✔
ENST00000472710.2	LRRC41	0.329119	3.22989e-12	0.54924	3.7182e-37	✔	✔
ENST00000497774.5	LRRC75A-AS1	0.315842	2.92743e-11	0.523999	2.17937e-33		✔
ENST00000354379.8	LRRFIP2	0.338136	6.78808e-13	0.300732	1.44835e-10	✔	✔
ENST00000279068.10	LSM14B	0.580101	1.09646e-41	0.422637	6.26695e-21	✔	✔
ENST00000480956.1	LSM5	0.321151	1.22591e-11	0.415564	3.35477e-20		✔
ENST00000424702.1	LSM8	0.321317	1.19237e-11	0.459221	5.64203e-25		✔
ENST00000343470.8	LYAR	0.305604	1.48858e-10	0.303912	8.84257e-11	✔	✔
ENST00000381356.8	LYRM5	0.335305	1.10963e-12	0.359771	5.14457e-15		✔
ENST00000495142.5	LZTR1	0.344353	2.23569e-13	0.558825	1.17335e-38		✔
ENST00000614891.4	MAL2	0.433351	1.28772e-21	0.316626	1.15162e-11	✔	✔
ENST00000470900.1	MANF	0.341562	3.68506e-13	0.460052	4.51278e-25		✔
ENST00000253055.7	MAP3K10	0.315164	3.26541e-11	0.47435	8.64602e-27		✔
ENST00000350878.8	MAP4K4	0.307346	1.13103e-10	0.31741	1.01302e-11	✔	✔
ENST00000425491.6	MAPK9	0.347773	1.20562e-13	0.35136	2.54642e-14		✔
ENST00000496658.5	MAPKAP1	0.361057	1.00672e-14	0.33281	7.37601e-13	✔	✔
ENST00000547915.1	MAPKAPK5	0.300868	3.06987e-10	0.404787	4.07365e-19		✔
ENST00000407981.6	MARC1	0.354022	3.8044e-14	0.361605	3.60452e-15		✔
ENST00000443880.1	MARC1	0.398104	4.9548e-18	0.355987	1.06457e-14		✔
ENST00000496110.1	MARC1	0.346047	1.64243e-13	0.348225	4.56821e-14		✔
ENST00000492319.1	MARCH5	0.387689	4.58652e-17	0.483582	6.16736e-28		✔
ENST00000510792.1	MARCH6	0.33034	2.62371e-12	0.47637	4.88651e-27		✔
ENST00000511802.5	MARCH6	0.317958	2.06648e-11	0.452132	3.77846e-24		✔
ENST00000266643.5	MARCH9	0.367257	2.99142e-15	0.320088	6.49688e-12		✔
ENST00000377810.7	MARK2	0.300775	3.11462e-10	0.311677	2.57425e-11		✔
ENST00000216288.11	MARK3	0.391138	2.19431e-17	0.328242	1.62978e-12		✔
ENST00000556463.5	MARK3	0.34277	2.9644e-13	0.486369	2.75149e-28		✔
ENST00000262891.8	MARK4	0.308223	9.88148e-11	0.31663	1.15096e-11	✔	✔
ENST00000282276.7	MARS2	0.334089	1.37195e-12	0.370849	5.80456e-16		✔
ENST00000467367.5	MAST2	0.30437	1.79615e-10	0.361439	3.72077e-15		✔
ENST00000502929.5	MATR3	0.306302	1.33201e-10	0.333052	7.07143e-13	✔	✔
ENST00000545521.5	MAZ	0.340723	4.28906e-13	0.332003	8.4852e-13		✔
ENST00000565777.1	MAZ	0.327657	4.1376e-12	0.423783	4.74786e-21		✔
ENST00000578272.1	MBD2	0.419619	3.64286e-20	0.340156	1.99712e-13		✔
ENST00000548550.1	MBD6	0.31023	7.20238e-11	0.414194	4.6344e-20		✔
ENST00000305997.7	MBOAT2	0.362069	8.26558e-15	0.326177	2.32298e-12		✔
ENST00000471753.5	MBOAT2	0.315846	2.926e-11	0.318277	8.7758e-12		✔
ENST00000473432.1	MBOAT2	0.344604	2.13384e-13	0.471719	1.80604e-26		✔
ENST00000415868.5	MBTD1	0.327736	4.08582e-12	0.318723	8.14548e-12		✔
ENST00000494660.6	MCEE	0.347132	1.35256e-13	0.482124	9.43702e-28	✔	✔
ENST00000496607.5	MCM3AP	0.331058	2.32135e-12	0.482651	8.10179e-28	✔	✔
ENST00000303887.9	MCM7	0.325287	6.1751e-12	0.359473	5.44703e-15		✔
ENST00000379170.8	MCUR1	0.3214	1.17704e-11	0.32417	3.26568e-12		✔
ENST00000444034.1	MED12	0.376036	5.20001e-16	0.355464	1.17594e-14	✔	✔
ENST00000525613.1	MED17	0.393373	1.36379e-17	0.476137	5.2169e-27		✔
ENST00000533133.5	MED17	0.383918	1.02416e-16	0.382467	5.30017e-17		✔
ENST00000533367.5	MED17	0.319253	1.67285e-11	0.30865	4.1779e-11		✔
ENST00000484885.1	MED23	0.343493	2.60885e-13	0.472268	1.54657e-26		✔
ENST00000263390.7	MED26	0.388755	3.67203e-17	0.366008	1.52618e-15		✔
ENST00000404530.5	MEMO1	0.61525	6.9407e-48	0.459472	5.27363e-25	✔	✔
ENST00000312049.10	MEN1	0.355398	2.93847e-14	0.347435	5.28278e-14	✔	✔
ENST00000478548.1	MEN1	0.381683	1.63017e-16	0.557787	1.72138e-38	✔	✔
ENST00000551117.1	METTL1	0.345447	1.83316e-13	0.350685	2.8843e-14		✔
ENST00000368836.6	METTL10	0.36662	3.3808e-15	0.337144	3.43205e-13	✔	✔
ENST00000464099.5	METTL10	0.394972	9.68804e-18	0.3531	1.84054e-14	✔	✔
ENST00000298717.8	METTL3	0.391922	1.84864e-17	0.484545	4.66163e-28		✔
ENST00000383790.7	METTL6	0.396909	6.38416e-18	0.326961	2.03585e-12		✔
ENST00000564733.1	METTL9	0.303522	2.04108e-10	0.512659	8.65684e-32		✔
ENST00000402693.4	MEX3D	0.435248	7.98106e-22	0.414449	4.36861e-20		✔
ENST00000357390.8	MFN1	0.380686	2.01079e-16	0.414968	3.86119e-20		✔
ENST00000466287.1	MFN1	0.303909	1.92807e-10	0.398528	1.65471e-18		✔
ENST00000329687.8	MFSD10	0.306407	1.31106e-10	0.48786	1.77424e-28	✔	✔
ENST00000509676.1	MFSD10	0.347303	1.31137e-13	0.524729	1.69405e-33	✔	✔
ENST00000337755.9	MGAT4B	0.398497	4.54823e-18	0.566256	7.3674e-40	✔	✔
ENST00000521305.5	MGAT4B	0.304154	1.85693e-10	0.354645	1.37624e-14	✔	✔
ENST00000340535.11	MIA3	0.362087	8.23855e-15	0.328193	1.64323e-12		✔
ENST00000467190.1	MIA3	0.310989	6.37184e-11	0.408021	1.94576e-19		✔
ENST00000475451.1	MIA3	0.331179	2.27284e-12	0.361575	3.62598e-15		✔
ENST00000382374.8	MICU2	0.46426	3.91743e-25	0.336628	3.762e-13		✔
ENST00000539062.6	MIPOL1	0.371701	1.25166e-15	0.328563	1.54005e-12	✔	✔
ENST00000553349.1	MIPOL1	0.305523	1.5073e-10	0.34898	3.9664e-14	✔	✔
ENST00000464685.1	MITD1	0.305353	1.54538e-10	0.472834	1.31511e-26		✔
ENST00000466880.5	MITD1	0.304582	1.74018e-10	0.323272	3.80139e-12		✔
ENST00000464771.1	MKI67	0.457518	2.4185e-24	0.309858	3.44681e-11		✔
ENST00000475010.5	MKRN1	0.367637	2.78056e-15	0.484429	4.81298e-28		✔
ENST00000539187.5	MLF2	0.308289	9.77722e-11	0.449208	8.12171e-24		✔
ENST00000541305.1	MLF2	0.317014	2.41377e-11	0.472004	1.66557e-26		✔
ENST00000541346.1	MLF2	0.350273	7.64495e-14	0.547504	6.76168e-37		✔
ENST00000511503.1	MLLT4	0.320085	1.45558e-11	0.487779	1.81163e-28	✔	✔
ENST00000468178.5	MLPH	0.332284	1.87737e-12	0.578346	6.92162e-42	✔	✔
ENST00000588320.1	MLX	0.300981	3.01709e-10	0.44561	2.07178e-23	✔	✔
ENST00000590050.5	MLX	0.331381	2.19782e-12	0.452095	3.8136e-24	✔	✔
ENST00000556883.1	MOAP1	0.338985	5.85202e-13	0.395806	3.01402e-18		✔
ENST00000441076.6	MORF4L2	0.407287	6.31023e-19	0.322758	4.14487e-12	✔	✔
ENST00000474653.5	MORF4L2	0.378664	3.04929e-16	0.466815	7.02969e-26	✔	✔
ENST00000307450.10	MORN4	0.31015	7.2922e-11	0.309598	3.59288e-11		✔
ENST00000367846.8	MPC2	0.349329	9.06073e-14	0.362859	2.82647e-15		✔
ENST00000244230.6	MPHOSPH10	0.592469	6.90965e-44	0.45982	4.80468e-25		✔
ENST00000222644.9	MPP6	0.373501	8.71424e-16	0.328118	1.66477e-12	✔	✔
ENST00000512914.1	MRFAP1	0.301581	2.75235e-10	0.465267	1.07554e-25		✔
ENST00000588526.5	MRI1	0.308945	8.82088e-11	0.558581	1.27326e-38	✔	✔
ENST00000593245.5	MRI1	0.395615	8.4618e-18	0.540605	7.60314e-36	✔	✔
ENST00000306185.7	MRPL13	0.435911	6.79506e-22	0.36419	2.1805e-15		✔
ENST00000260102.8	MRPL15	0.43763	4.40236e-22	0.384996	3.11004e-17		✔
ENST00000439747.7	MRPL22	0.405742	8.97344e-19	0.37046	6.26708e-16		✔
ENST00000614620.1	MRPL22	0.547711	1.5648e-36	0.386439	2.2938e-17		✔
ENST00000264995.7	MRPL3	0.581087	8.00823e-42	0.382455	5.31288e-17	✔	✔
ENST00000393128.8	MRPL42	0.491388	1.64943e-28	0.347217	5.50217e-14		✔
ENST00000544819.5	MRPL48	0.411411	2.46699e-19	0.391812	7.23178e-18		✔
ENST00000374865.4	MRPL50	0.537649	5.15095e-35	0.366493	1.38791e-15		✔
ENST00000462783.1	MRPL9	0.336744	8.65924e-13	0.459808	4.815e-25		✔
ENST00000488606.5	MRPS15	0.370781	1.50015e-15	0.531694	1.59737e-34	✔	✔
ENST00000521605.1	MRPS28	0.382035	1.51534e-16	0.340148	1.99938e-13	✔	✔
ENST00000496641.1	MRPS33	0.526773	1.8921e-33	0.44256	4.52987e-23		✔
ENST00000081029.7	MRPS35	0.335565	1.06128e-12	0.333346	6.71532e-13		✔
ENST00000579002.5	MRPS7	0.316414	2.66577e-11	0.461292	3.21407e-25		✔
ENST00000297908.7	MRRF	0.333991	1.3958e-12	0.329096	1.40441e-12	✔	✔
ENST00000373728.6	MRRF	0.328309	3.71842e-12	0.540087	9.11323e-36	✔	✔
ENST00000441707.5	MRRF	0.300965	3.02426e-10	0.308522	4.26431e-11	✔	✔
ENST00000489572.5	MRRF	0.392127	1.77167e-17	0.5233	2.7026e-33	✔	✔
ENST00000526629.1	MSANTD2	0.327751	4.07515e-12	0.503144	1.79069e-30		✔
ENST00000395853.5	MSH5	0.315429	3.12669e-11	0.589434	7.94088e-44		✔
ENST00000467319.1	MSH5	0.308889	8.89452e-11	0.445874	1.93502e-23		✔
ENST00000234420.9	MSH6	0.383431	1.13071e-16	0.497263	1.07486e-29	✔	✔
ENST00000257552.6	MSI1	0.438487	3.5655e-22	0.424148	4.34568e-21		✔
ENST00000577454.5	MSL1	0.369332	1.9908e-15	0.371671	4.89907e-16		✔
ENST00000337339.6	MSL3	0.318539	1.87949e-11	0.397001	2.31479e-18		✔
ENST00000438684.1	MSL3P1	0.37924	2.70183e-16	0.318598	8.31716e-12		✔
ENST00000488350.6	MST1	0.329022	3.2848e-12	0.52925	3.71473e-34		✔
ENST00000491943.1	MST1	0.393009	1.46838e-17	0.532875	1.06516e-34		✔
ENST00000478756.1	MSTO1	0.354669	3.3717e-14	0.481881	1.01091e-27		✔
ENST00000426567.5	MTA1	0.396288	7.32639e-18	0.43956	9.66392e-23		✔
ENST00000482875.5	MTA3	0.334646	1.24425e-12	0.518013	1.52613e-32	✔	✔
ENST00000305949.5	MTBP	0.38212	1.48875e-16	0.418151	1.83024e-20		✔
ENST00000522449.1	MTBP	0.362991	6.90075e-15	0.446811	1.51827e-23		✔
ENST00000351870.7	MTERF1	0.497237	2.73897e-29	0.350853	2.79782e-14		✔
ENST00000552029.1	MTERF2	0.323892	7.78372e-12	0.522679	3.34121e-33		✔
ENST00000287025.3	MTERF3	0.483498	1.70019e-27	0.400375	1.10042e-18		✔
ENST00000262146.8	MTFR1	0.386367	6.09594e-17	0.347744	4.99156e-14	✔	✔
ENST00000523158.5	MTFR1	0.31638	2.6806e-11	0.3752	2.39529e-16	✔	✔
ENST00000466284.1	MTFR1L	0.315595	3.04406e-11	0.536545	3.05456e-35	✔	✔
ENST00000494293.1	MTFR1L	0.348353	1.08339e-13	0.506283	6.66082e-31	✔	✔
ENST00000497956.1	MTFR1L	0.300794	3.10552e-10	0.49921	5.9729e-30	✔	✔
ENST00000216605.12	MTHFD1	0.327317	4.38606e-12	0.301728	1.24187e-10	✔	✔
ENST00000409601.1	MTHFD2	0.349956	8.1093e-14	0.350113	3.20863e-14	✔	✔
ENST00000461101.1	MTHFD2L	0.347703	1.22119e-13	0.445967	1.89145e-23	✔	✔
ENST00000255087.9	MTL5	0.336087	9.70064e-13	0.330995	1.01255e-12	✔	✔
ENST00000443940.6	MTL5	0.403946	1.3424e-18	0.44029	8.04886e-23	✔	✔
ENST00000249442.10	MTX2	0.359196	1.43539e-14	0.331591	9.12278e-13	✔	✔
ENST00000274813.3	MUT	0.318378	1.93012e-11	0.329024	1.42189e-12		✔
ENST00000324324.11	MYEF2	0.316449	2.65179e-11	0.358335	6.77805e-15		✔
ENST00000560530.5	MYEF2	0.355512	2.87597e-14	0.478548	2.62887e-27		✔
ENST00000620867.4	MYEF2	0.367126	3.06825e-15	0.326779	2.0982e-12		✔
ENST00000614623.4	MYO19	0.371692	1.25358e-15	0.480275	1.61219e-27	✔	✔
ENST00000622766.1	MYSM1	0.41037	3.14166e-19	0.564685	1.30764e-39		✔
ENST00000215057.6	MZF1	0.342447	3.14317e-13	0.440891	6.9129e-23	✔	✔
ENST00000334982.8	NAA20	0.339467	5.36664e-13	0.329191	1.38132e-12	✔	✔
ENST00000377793.8	NAA40	0.338438	6.43975e-13	0.303691	9.14365e-11		✔
ENST00000414063.6	NAA60	0.303063	2.1917e-10	0.356102	1.04157e-14	✔	✔
ENST00000614002.4	NAALADL2	0.3869	5.43915e-17	0.34183	1.47353e-13		✔
ENST00000393891.8	NACA	0.505358	2.12539e-30	0.388036	1.62883e-17		✔
ENST00000477235.5	NADK	0.413297	1.58941e-19	0.544048	2.24915e-36		✔
ENST00000589314.1	NARS	0.306805	1.23235e-10	0.417035	2.37279e-20		✔
ENST00000281038.9	NARS2	0.398625	4.42326e-18	0.353757	1.62669e-14		✔
ENST00000583271.5	NBPF8	0.308875	8.91479e-11	0.549415	3.53652e-37		✔
ENST00000409339.3	NCAPG2	0.313583	4.21456e-11	0.302235	1.14816e-10	✔	✔
ENST00000461347.5	NCL	0.382832	1.28335e-16	0.479206	2.17837e-27		✔
ENST00000428459.6	NDUFA13	0.376177	5.05321e-16	0.309975	3.3834e-11		✔
ENST00000237889.8	NDUFB3	0.443944	8.80564e-23	0.357358	8.18789e-15		✔
ENST00000184266.2	NDUFB4	0.566388	1.97057e-39	0.328032	1.69061e-12		✔
ENST00000485064.1	NDUFB4	0.32213	1.04257e-11	0.389557	1.17518e-17		✔
ENST00000492739.1	NDUFB4	0.326012	5.47101e-12	0.333088	7.03069e-13		✔
ENST00000496588.1	NDUFB4	0.380733	1.99137e-16	0.35501	1.28342e-14		✔
ENST00000350021.2	NDUFB6	0.485337	9.86707e-28	0.415951	3.06414e-20		✔
ENST00000528164.1	NDUFC2	0.372836	9.96532e-16	0.397168	2.23463e-18		✔
ENST00000524838.5	NDUFV1	0.321555	1.14741e-11	0.412679	6.59556e-20		✔
ENST00000582375.1	NDUFV2-AS1	0.365686	4.05957e-15	0.397063	2.28462e-18		✔
ENST00000499732.2	NEAT1	0.313265	4.43385e-11	0.462527	2.27961e-25	✔	✔
ENST00000533242.1	NEDD8	0.308653	9.23049e-11	0.328606	1.5292e-12		✔
ENST00000411638.6	NELFA	0.355538	2.86167e-14	0.390699	9.18407e-18		✔
ENST00000474543.5	NELFCD	0.307812	1.05263e-10	0.480486	1.52202e-27	✔	✔
ENST00000602795.5	NELFCD	0.395941	7.88953e-18	0.437368	1.6816e-22	✔	✔
ENST00000557389.1	NFKBIA	0.321808	1.1016e-11	0.302803	1.0504e-10		✔
ENST00000410022.6	NFU1	0.332145	1.92322e-12	0.333615	6.40985e-13		✔
ENST00000341376.10	NFYA	0.467042	1.82422e-25	0.426815	2.28282e-21		✔
ENST00000489271.5	NGLY1	0.370128	1.70587e-15	0.425778	2.92947e-21		✔
ENST00000496726.5	NGLY1	0.379643	2.49322e-16	0.379734	9.38931e-17		✔
ENST00000427025.6	NHSL1	0.359363	1.39057e-14	0.344433	9.16354e-14	✔	✔
ENST00000368007.8	NIT1	0.314525	3.61673e-11	0.372605	4.05638e-16		✔
ENST00000496861.5	NIT1	0.309056	8.67932e-11	0.382401	5.37538e-17		✔
ENST00000304449.5	NKRF	0.323897	7.77879e-12	0.304949	7.50514e-11	✔	✔
ENST00000393193.6	NME2	0.367484	2.86483e-15	0.302519	1.09755e-10		✔
ENST00000538802.1	NOL8	0.30615	1.36504e-10	0.331262	9.65895e-13	✔	✔
ENST00000544867.5	NOL8	0.335939	9.9571e-13	0.486124	2.95963e-28	✔	✔
ENST00000276079.12	NONO	0.323573	8.22695e-12	0.353641	1.66232e-14		✔
ENST00000473525.1	NONO	0.386284	6.20819e-17	0.598196	2.07916e-45		✔
ENST00000614830.4	NOP16	0.409436	3.87041e-19	0.302105	1.17091e-10	✔	✔
ENST00000399466.6	NOP2	0.391523	2.01551e-17	0.41119	9.34007e-20		✔
ENST00000496775.5	NOP56	0.303836	1.94703e-10	0.387902	1.67633e-17		✔
ENST00000264279.9	NOP58	0.458806	1.70609e-24	0.355315	1.21017e-14		✔
ENST00000525817.5	NPEPL1	0.311459	5.91266e-11	0.352229	2.16378e-14	✔	✔
ENST00000344087.4	NPIPA7	0.348638	1.02819e-13	0.41423	4.59635e-20		✔
ENST00000542133.5	NPIPB4	0.300184	3.40339e-10	0.380233	8.4553e-17		✔
ENST00000536620.1	NPIPB5	0.304147	1.85847e-10	0.379287	1.02936e-16		✔
ENST00000544308.5	NPIPB5	0.307626	1.0829e-10	0.381647	6.31435e-17		✔
ENST00000523339.1	NPM1	0.375156	6.2233e-16	0.338924	2.49442e-13		✔
ENST00000539693.1	NR2C2AP	0.338352	6.53347e-13	0.378445	1.2283e-16		✔
ENST00000423469.6	NRBP2	0.306648	1.26226e-10	0.422527	6.43158e-21		✔
ENST00000442628.6	NRBP2	0.305424	1.52933e-10	0.464183	1.45552e-25		✔
ENST00000475310.5	NRD1	0.309703	7.82413e-11	0.452323	3.59222e-24		✔
ENST00000477428.5	NRF1	0.312736	4.81863e-11	0.393543	4.95226e-18	✔	✔
ENST00000381653.9	NSFL1C	0.428158	4.64783e-21	0.463704	1.6539e-25		✔
ENST00000287437.7	NSMCE2	0.381825	1.58418e-16	0.375249	2.37296e-16	✔	✔
ENST00000468209.5	NSMCE4A	0.332	1.97252e-12	0.438152	1.38536e-22		✔
ENST00000264670.10	NSUN2	0.348854	9.86953e-14	0.323914	3.40856e-12	✔	✔
ENST00000393633.6	NSUN5P1	0.354402	3.54622e-14	0.605704	9.20383e-47		✔
ENST00000460749.1	NT5DC1	0.326743	4.83017e-12	0.329413	1.32859e-12		✔
ENST00000563821.1	NUBP2	0.302989	2.2162e-10	0.476084	5.29099e-27		✔
ENST00000512216.5	NUDT9	0.394166	1.14938e-17	0.328127	1.66251e-12		✔
ENST00000541584.5	NUMA1	0.359124	1.45379e-14	0.320953	5.62552e-12		✔
ENST00000359560.7	NUMB	0.371331	1.34827e-15	0.397016	2.30797e-18	✔	✔
ENST00000477620.5	NUP205	0.372458	1.07588e-15	0.378638	1.179e-16		✔
ENST00000295119.8	NUP35	0.318899	1.77146e-11	0.303533	9.37329e-11	✔	✔
ENST00000477844.1	NUPL2	0.426002	7.84464e-21	0.532807	1.08836e-34		✔
ENST00000502972.1	OCIAD1	0.308993	8.75834e-11	0.327515	1.84967e-12	✔	✔
ENST00000351030.7	ODF2	0.340947	4.11993e-13	0.317504	9.97163e-12	✔	✔
ENST00000490265.5	OFD1	0.338531	6.34092e-13	0.492783	4.16365e-29		✔
ENST00000373719.7	OGT	0.319711	1.54994e-11	0.586964	2.17609e-43	✔	✔
ENST00000530490.1	OR7E14P	0.323614	8.17449e-12	0.324669	3.00201e-12		✔
ENST00000279147.8	ORAOV1	0.300576	3.21291e-10	0.300899	1.41145e-10		✔
ENST00000464147.1	ORC2	0.385855	6.78717e-17	0.500209	4.41538e-30		✔
ENST00000219097.6	ORC6	0.439909	2.47476e-22	0.307766	4.80845e-11		✔
ENST00000532951.1	OSBPL5	0.300404	3.2958e-10	0.447005	1.44468e-23	✔	✔
ENST00000280701.7	OXSM	0.327378	4.34128e-12	0.423728	4.80992e-21		✔
ENST00000467086.5	P4HB	0.372001	1.17914e-15	0.470006	2.92017e-26		✔
ENST00000477607.6	P4HB	0.343246	2.72554e-13	0.571037	1.16125e-40		✔
ENST00000571507.5	P4HB	0.314034	3.92271e-11	0.363112	2.69174e-15		✔
ENST00000574007.5	P4HB	0.42184	2.15504e-20	0.578179	7.31817e-42		✔
ENST00000552266.1	PA2G4	0.331997	1.97322e-12	0.350458	3.00712e-14	✔	✔
ENST00000517403.5	PABPC1	0.369718	1.84611e-15	0.345011	8.25091e-14		✔
ENST00000517921.1	PABPC1	0.365303	4.37733e-15	0.464409	1.36534e-25		✔
ENST00000519004.5	PABPC1	0.423372	1.48217e-20	0.369246	8.00339e-16		✔
ENST00000519100.5	PABPC1	0.309994	7.46998e-11	0.338051	2.92138e-13		✔
ENST00000522387.5	PABPC1	0.357493	1.97199e-14	0.35578	1.10682e-14		✔
ENST00000522658.5	PABPC1	0.410151	3.29992e-19	0.479122	2.22668e-27		✔
ENST00000281589.4	PABPC3	0.387758	4.52205e-17	0.350747	2.85202e-14		✔
ENST00000372858.7	PABPC4	0.385684	7.03229e-17	0.345332	7.78103e-14		✔
ENST00000468476.1	PABPC4	0.305463	1.52099e-10	0.522531	3.50247e-33		✔
ENST00000397276.6	PABPN1	0.357199	2.08535e-14	0.618017	5.7043e-49	✔	✔
ENST00000556821.5	PABPN1	0.314283	3.76469e-11	0.411557	8.57622e-20	✔	✔
ENST00000557702.5	PABPN1	0.394221	1.13569e-17	0.408563	1.71994e-19	✔	✔
ENST00000264221.6	PAICS	0.454725	5.15247e-24	0.41033	1.14157e-19		✔
ENST00000399688.7	PAICS	0.467024	1.82978e-25	0.383098	4.63804e-17		✔
ENST00000512576.2	PAICS	0.355137	3.08166e-14	0.367877	1.05257e-15		✔
ENST00000338972.8	PAIP1	0.342551	3.08412e-13	0.309901	3.42274e-11		✔
ENST00000493678.5	PARK7	0.313238	4.45369e-11	0.304327	8.28692e-11		✔
ENST00000488202.1	PARL	0.309695	7.83124e-11	0.349597	3.53412e-14	✔	✔
ENST00000547699.1	PAWR	0.337216	7.9694e-13	0.482917	7.49871e-28	✔	✔
ENST00000331923.8	PAXBP1	0.302346	2.44055e-10	0.301477	1.29087e-10	✔	✔
ENST00000404141.5	PAXIP1	0.472875	3.65441e-26	0.424557	3.94277e-21	✔	✔
ENST00000608317.1	PAXIP1-AS1	0.322844	9.27428e-12	0.499929	4.79283e-30		✔
ENST00000301905.8	PBK	0.434143	1.05623e-21	0.303413	9.54859e-11		✔
ENST00000358769.6	PBLD	0.314632	3.55332e-11	0.315241	1.44678e-11	✔	✔
ENST00000299299.3	PCBD1	0.303817	1.95229e-10	0.352224	2.16577e-14		✔
ENST00000437019.1	PCBP1-AS1	0.368632	2.29212e-15	0.465006	1.15489e-25		✔
ENST00000458698.6	PCBP1-AS1	0.399428	3.70015e-18	0.345207	7.96371e-14		✔
ENST00000547048.5	PCBP2	0.347603	1.24322e-13	0.569022	2.50835e-40	✔	✔
ENST00000550585.5	PCBP2	0.307442	1.1142e-10	0.4985	7.44201e-30	✔	✔
ENST00000553064.6	PCBP2	0.379537	2.54355e-16	0.304336	8.27473e-11	✔	✔
ENST00000528336.1	PCF11	0.357709	1.89606e-14	0.388438	1.49616e-17	✔	✔
ENST00000624931.1	PCF11	0.324216	7.36925e-12	0.474731	7.77754e-27	✔	✔
ENST00000233630.10	PCGF1	0.387375	4.90299e-17	0.466901	6.86918e-26		✔
ENST00000362003.9	PCGF3	0.326516	5.0224e-12	0.52875	4.42437e-34	✔	✔
ENST00000440452.5	PCGF3	0.346229	1.58997e-13	0.475738	5.83892e-27	✔	✔
ENST00000493650.5	PCID2	0.309847	7.64487e-11	0.503824	1.44298e-30		✔
ENST00000540028.5	PCSK7	0.400343	3.01065e-18	0.427771	1.81172e-21	✔	✔
ENST00000443345.2	PDCD2	0.33028	2.64931e-12	0.361058	4.01135e-15	✔	✔
ENST00000587385.6	PDCD2L	0.35753	1.95854e-14	0.381181	6.95636e-17	✔	✔
ENST00000590247.6	PDCD5	0.531388	4.00909e-34	0.359884	5.04031e-15		✔
ENST00000528602.1	PDDC1	0.305514	1.50943e-10	0.393421	5.08235e-18		✔
ENST00000466592.1	PDIA4	0.367977	2.60456e-15	0.50725	4.89989e-31		✔
ENST00000489923.5	PDIA5	0.331254	2.24505e-12	0.385962	2.53358e-17	✔	✔
ENST00000444100.2	PEX13	0.329507	3.02524e-12	0.323832	3.45681e-12		✔
ENST00000374607.5	PFDN6	0.460111	1.21465e-24	0.310309	3.2087e-11		✔
ENST00000463584.1	PFDN6	0.309712	7.81412e-11	0.403148	5.91156e-19		✔
ENST00000474114.5	PFKL	0.354088	3.75705e-14	0.549893	3.02776e-37	✔	✔
ENST00000498926.6	PGAM5	0.345978	1.66145e-13	0.347974	4.78549e-14		✔
ENST00000527810.1	PGAP2	0.320524	1.35642e-11	0.504147	1.30501e-30	✔	✔
ENST00000394276.3	PGRMC2	0.311004	6.35844e-11	0.33411	5.88238e-13		✔
ENST00000419140.6	PHB	0.308398	9.61752e-11	0.364854	1.91301e-15		✔
ENST00000540809.1	PHC1	0.302886	2.25113e-10	0.458844	6.24952e-25		✔
ENST00000423760.6	PHF14	0.434365	9.97337e-22	0.354706	1.35984e-14	✔	✔
ENST00000469407.5	PHF14	0.301205	2.91542e-10	0.444017	3.12768e-23	✔	✔
ENST00000395374.1	PHF20L1	0.498746	1.7476e-29	0.34539	7.70261e-14	✔	✔
ENST00000338946.10	PHF8	0.311608	5.77523e-11	0.420395	1.07167e-20		✔
ENST00000569762.1	PHKG2	0.313295	4.41422e-11	0.463561	1.71814e-25		✔
ENST00000306465.8	PIGF	0.311728	5.6687e-11	0.373352	3.4811e-16		✔
ENST00000399098.5	PIGP	0.3849	8.30667e-17	0.39864	1.61579e-18		✔
ENST00000620233.1	PIGW	0.426306	7.27833e-21	0.366315	1.4373e-15		✔
ENST00000456957.2	PKNOX1	0.319001	1.74266e-11	0.38393	3.89049e-17	✔	✔
ENST00000477870.5	PLCG1	0.30556	1.49912e-10	0.39899	1.49604e-18	✔	✔
ENST00000559981.1	PLEKHH1	0.318796	1.80283e-11	0.421102	9.04964e-21		✔
ENST00000588450.1	PLEKHJ1	0.327939	3.95665e-12	0.49307	3.84473e-29		✔
ENST00000487563.1	PLOD3	0.345248	1.89799e-13	0.306125	6.23701e-11		✔
ENST00000497802.1	PLXNA3	0.402569	1.83563e-18	0.437065	1.80808e-22		✔
ENST00000268261.8	PMM2	0.348995	9.62436e-14	0.300808	1.43147e-10	✔	✔
ENST00000428154.5	PMPCB	0.467197	1.75799e-25	0.589085	9.07004e-44		✔
ENST00000444457.5	PMPCB	0.330524	2.54353e-12	0.375231	2.38116e-16		✔
ENST00000456433.5	PMPCB	0.359533	1.34459e-14	0.512993	7.8016e-32		✔
ENST00000469560.1	PMPCB	0.310097	7.35572e-11	0.451274	4.73486e-24		✔
ENST00000431037.1	PMS2P1	0.543287	7.23273e-36	0.405416	3.52674e-19		✔
ENST00000216832.8	PNN	0.390134	2.72494e-17	0.506851	5.54488e-31	✔	✔
ENST00000481066.1	PNPT1	0.359567	1.33706e-14	0.49316	3.74664e-29		✔
ENST00000358476.7	POGZ	0.343498	2.60727e-13	0.41136	8.9666e-20		✔
ENST00000514141.5	POLK	0.347601	1.24322e-13	0.316506	1.1753e-11		✔
ENST00000488601.6	POLR1C	0.34211	3.33599e-13	0.42001	1.17447e-20		✔
ENST00000626929.1	POLR1D	0.339223	5.61182e-13	0.494059	2.83969e-29		✔
ENST00000455712.5	POLR2H	0.395043	9.54289e-18	0.375746	2.14273e-16	✔	✔
ENST00000488213.5	POLR2H	0.364738	4.89618e-15	0.494083	2.82255e-29	✔	✔
ENST00000608621.5	POLR2J3	0.319826	1.51909e-11	0.328513	1.55342e-12		✔
ENST00000519765.1	POLR2K	0.379097	2.78628e-16	0.351171	2.63643e-14		✔
ENST00000554564.1	POMT2	0.319244	1.67508e-11	0.469256	3.58366e-26		✔
ENST00000460873.5	PON2	0.364665	4.96759e-15	0.493294	3.59303e-29	✔	✔
ENST00000264220.6	PPAT	0.402923	1.69609e-18	0.343529	1.08249e-13		✔
ENST00000532793.1	PPFIA1	0.387042	5.2768e-17	0.345507	7.53541e-14		✔
ENST00000432191.6	PPHLN1	0.338036	6.90988e-13	0.340011	2.04999e-13	✔	✔
ENST00000451562.5	PPIA	0.307003	1.19388e-10	0.311037	2.85217e-11		✔
ENST00000481437.5	PPIA	0.364553	5.07378e-15	0.393717	4.77174e-18		✔
ENST00000494484.1	PPIA	0.304647	1.72274e-10	0.538516	1.52336e-35		✔
ENST00000409432.7	PPM1B	0.334989	1.17491e-12	0.330095	1.18202e-12		✔
ENST00000376745.8	PPP1CA	0.390758	2.38277e-17	0.393315	5.19822e-18		✔
ENST00000526510.5	PPP1CA	0.305556	1.49985e-10	0.47509	7.02008e-27		✔
ENST00000376758.1	PPP1R11	0.319202	1.68592e-11	0.499936	4.78989e-30		✔
ENST00000526183.5	PPP1R16A	0.394895	9.84976e-18	0.58611	3.10485e-43		✔
ENST00000533088.1	PPP1R16A	0.394557	1.05628e-17	0.397074	2.2801e-18		✔
ENST00000603624.1	PPP1R26-AS1	0.344673	2.10827e-13	0.51401	5.61276e-32		✔
ENST00000340694.8	PPP1R9A	0.302562	2.36183e-10	0.345334	7.77978e-14		✔
ENST00000490777.3	PPP2R2D	0.376996	4.27741e-16	0.350165	3.17715e-14		✔
ENST00000422769.6	PPP2R5E	0.347294	1.31338e-13	0.325551	2.58318e-12	✔	✔
ENST00000323055.10	PPP3CA	0.336599	8.87348e-13	0.359864	5.05958e-15		✔
ENST00000394854.7	PPP3CA	0.321018	1.25391e-11	0.314451	1.64551e-11		✔
ENST00000012443.8	PPP5C	0.362363	7.80051e-15	0.395391	3.30399e-18	✔	✔
ENST00000361188.9	PRC1	0.356965	2.18e-14	0.371953	4.63057e-16		✔
ENST00000394249.7	PRC1	0.459244	1.51838e-24	0.397925	1.89045e-18		✔
ENST00000442656.6	PRC1	0.379831	2.39846e-16	0.334397	5.59283e-13		✔
ENST00000298510.3	PRDX3	0.41984	3.45216e-20	0.325353	2.67116e-12		✔
ENST00000260045.7	PRKRIR	0.337439	7.67171e-13	0.316641	1.14889e-11		✔
ENST00000324862.6	PRPF3	0.300279	3.35724e-10	0.355878	1.08652e-14	✔	✔
ENST00000467514.1	PRPF3	0.310586	6.80075e-11	0.519574	9.14535e-33	✔	✔
ENST00000370025.8	PRPF38B	0.355926	2.66113e-14	0.364841	1.91763e-15	✔	✔
ENST00000485810.1	PRPF38B	0.310271	7.15729e-11	0.483058	7.18463e-28	✔	✔
ENST00000355765.10	PRPF39	0.342971	2.86124e-13	0.34782	4.92232e-14		✔
ENST00000477626.5	PRPF39	0.361959	8.44929e-15	0.479371	2.07525e-27		✔
ENST00000480058.5	PRPF4B	0.33496	1.17924e-12	0.464223	1.43935e-25		✔
ENST00000618550.4	PRR36	0.318165	1.9974e-11	0.351928	2.29143e-14		✔
ENST00000460302.1	PRRC2A	0.342155	3.30894e-13	0.515324	3.64199e-32		✔
ENST00000484787.1	PRRC2A	0.31891	1.76847e-11	0.439726	9.27845e-23		✔
ENST00000527632.1	PSMA1	0.357707	1.89606e-14	0.432194	6.09128e-22		✔
ENST00000411875.1	PSMA2	0.311616	5.769e-11	0.49955	5.36754e-30		✔
ENST00000554812.5	PSMA3	0.326483	5.05122e-12	0.428845	1.3929e-21	✔	✔
ENST00000555037.1	PSMA3-AS1	0.421727	2.21341e-20	0.382266	5.52871e-17	✔	✔
ENST00000558639.5	PSMA4	0.361939	8.48067e-15	0.398194	1.78269e-18		✔
ENST00000559146.5	PSMA4	0.421262	2.46699e-20	0.397598	2.0311e-18		✔
ENST00000261479.8	PSMA6	0.42683	6.41392e-21	0.308256	4.44706e-11		✔
ENST00000462957.1	PSMB1	0.305446	1.52436e-10	0.484371	4.88496e-28		✔
ENST00000578570.5	PSMC5	0.34506	1.96442e-13	0.411754	8.1878e-20	✔	✔
ENST00000581882.5	PSMC5	0.348902	9.77938e-14	0.49961	5.28969e-30	✔	✔
ENST00000554952.5	PSMC6	0.380003	2.31588e-16	0.49203	5.17958e-29		✔
ENST00000557085.1	PSMC6	0.397809	5.2784e-18	0.549997	2.92618e-37		✔
ENST00000527047.5	PSMD13	0.363064	6.80511e-15	0.527016	7.82055e-34	✔	✔
ENST00000534590.5	PSMD13	0.30842	9.58205e-11	0.324892	2.89122e-12	✔	✔
ENST00000461434.1	PSMD4	0.331616	2.10869e-12	0.457458	9.03029e-25	✔	✔
ENST00000476464.5	PSMD6	0.376004	5.23117e-16	0.495137	2.06076e-29	✔	✔
ENST00000558931.5	PSME2	0.357164	2.0985e-14	0.47977	1.84886e-27		✔
ENST00000441946.6	PSME3	0.338036	6.90988e-13	0.327594	1.82452e-12		✔
ENST00000317615.10	PSMG2	0.329823	2.8636e-12	0.387799	1.71408e-17		✔
ENST00000349038.8	PTBP1	0.353581	4.13565e-14	0.341134	1.67249e-13		✔
ENST00000394601.8	PTBP1	0.335681	1.04069e-12	0.34952	3.58473e-14		✔
ENST00000586944.5	PTBP1	0.304715	1.70462e-10	0.515513	3.41948e-32		✔
ENST00000464541.5	PTCD3	0.363705	5.98632e-15	0.440555	7.52125e-23		✔
ENST00000414274.7	PTGES3	0.381273	1.77492e-16	0.33397	6.02053e-13		✔
ENST00000537473.2	PTGES3	0.456632	3.07051e-24	0.498982	6.38486e-30		✔
ENST00000517712.5	PTK2	0.3444	2.21579e-13	0.499636	5.25314e-30	✔	✔
ENST00000523539.5	PTK2	0.467211	1.75475e-25	0.301518	1.28301e-10	✔	✔
ENST00000467816.1	PTMA	0.320468	1.36901e-11	0.369462	7.66511e-16		✔
ENST00000598632.5	PTOV1	0.329152	3.21259e-12	0.594789	9.26566e-45	✔	✔
ENST00000409433.2	PTRH2	0.371922	1.19798e-15	0.427624	1.87407e-21		✔
ENST00000470557.2	PTRH2	0.404176	1.27325e-18	0.518137	1.46877e-32		✔
ENST00000280362.7	PTS	0.483236	1.8231e-27	0.429214	1.27384e-21	✔	✔
ENST00000526683.5	PUF60	0.304213	1.84055e-10	0.441853	5.42393e-23		✔
ENST00000529693.1	PUF60	0.327691	4.11405e-12	0.454312	2.10959e-24		✔
ENST00000338086.9	PUM2	0.316376	2.68188e-11	0.315366	1.41679e-11	✔	✔
ENST00000376649.7	PUS1	0.371503	1.30136e-15	0.415784	3.18527e-20	✔	✔
ENST00000542167.2	PUS1	0.320316	1.40322e-11	0.426084	2.7227e-21	✔	✔
ENST00000356362.6	PUS7	0.485881	8.44828e-28	0.416931	2.43089e-20		✔
ENST00000517838.5	PVT1	0.303643	2.00441e-10	0.400255	1.12911e-18		✔
ENST00000522414.1	PVT1	0.310139	7.30418e-11	0.335018	5.01445e-13		✔
ENST00000522875.5	PVT1	0.310256	7.17351e-11	0.437284	1.71333e-22		✔
ENST00000337943.9	PYCR1	0.409408	3.89336e-19	0.526256	1.01576e-33		✔
ENST00000585244.1	PYCR1	0.309631	7.90966e-11	0.395506	3.22329e-18		✔
ENST00000478402.5	PYCR2	0.394388	1.09485e-17	0.525956	1.11431e-33		✔
ENST00000306125.10	QARS	0.303908	1.9282e-10	0.387511	1.82185e-17		✔
ENST00000470225.5	QARS	0.366206	3.66848e-15	0.474724	7.78493e-27		✔
ENST00000478561.5	QARS	0.329218	3.17505e-12	0.349221	3.79186e-14		✔
ENST00000482261.6	QARS	0.354388	3.55477e-14	0.535313	4.62586e-35		✔
ENST00000489642.5	QRICH1	0.35105	6.63015e-14	0.465096	1.12667e-25		✔
ENST00000485050.5	QTRTD1	0.305746	1.45567e-10	0.311907	2.48155e-11		✔
ENST00000358907.6	R3HDM2	0.311611	5.77322e-11	0.320154	6.42678e-12		✔
ENST00000590454.2	R3HDM4	0.304808	1.68135e-10	0.409175	1.4918e-19		✔
ENST00000565075.5	RAB11A	0.349609	8.62225e-14	0.339719	2.16065e-13		✔
ENST00000398529.7	RAB1A	0.367651	2.77341e-15	0.303697	9.13747e-11	✔	✔
ENST00000222256.8	RAB3A	0.349182	9.30154e-14	0.37125	5.34617e-16		✔
ENST00000425393.1	RAB3GAP1	0.352893	4.71224e-14	0.429274	1.25713e-21	✔	✔
ENST00000462353.1	RAB3GAP2	0.342501	3.11332e-13	0.43112	7.9269e-22	✔	✔
ENST00000550847.1	RAB3IP	0.36754	2.83381e-15	0.352179	2.18364e-14	✔	✔
ENST00000336083.7	RAB6A	0.352463	5.10502e-14	0.306834	5.58137e-11		✔
ENST00000410061.3	RAB6C	0.302655	2.33062e-10	0.373938	3.08743e-16		✔
ENST00000471759.5	RABGGTB	0.349319	9.07273e-14	0.440308	8.01227e-23		✔
ENST00000485459.5	RABGGTB	0.304571	1.74238e-10	0.397089	2.27251e-18		✔
ENST00000436380.5	RABL6	0.325798	5.67118e-12	0.468832	4.02879e-26		✔
ENST00000588329.5	RAD23A	0.302478	2.39292e-10	0.50529	9.13869e-31		✔
ENST00000358015.7	RAD23B	0.358778	1.55268e-14	0.355836	1.09528e-14	✔	✔
ENST00000352618.8	RAD51AP1	0.450797	1.46825e-23	0.342476	1.31038e-13		✔
ENST00000554259.5	RALGAPA1	0.333816	1.439e-12	0.362655	2.93976e-15		✔
ENST00000427175.2	RALGAPA2	0.357671	1.90833e-14	0.303574	9.31716e-11	✔	✔
ENST00000372050.7	RALGDS	0.301226	2.90746e-10	0.326669	2.13757e-12	✔	✔
ENST00000448364.5	RALY	0.313938	3.98087e-11	0.301187	1.3502e-10	✔	✔
ENST00000477395.5	RAN	0.322723	9.45717e-12	0.535393	4.524e-35		✔
ENST00000535090.5	RAN	0.315446	3.11872e-11	0.309591	3.5969e-11		✔
ENST00000539498.1	RAN	0.377005	4.27157e-16	0.488964	1.28744e-28		✔
ENST00000455915.6	RANGAP1	0.370855	1.48019e-15	0.535615	4.21535e-35	✔	✔
ENST00000611549.4	RAP1GAP	0.340052	4.8366e-13	0.477826	3.24022e-27		✔
ENST00000329236.8	RBM10	0.338424	6.4555e-13	0.4019	7.79315e-19	✔	✔
ENST00000399300.6	RBM12B	0.309317	8.32112e-11	0.361059	4.01135e-15		✔
ENST00000447032.1	RBM17	0.354641	3.38944e-14	0.317827	9.45884e-12		✔
ENST00000527449.1	RBM25	0.359071	1.46833e-14	0.429545	1.17549e-21	✔	✔
ENST00000415472.6	RBM28	0.379918	2.35549e-16	0.368813	8.71955e-16	✔	✔
ENST00000488249.1	RBM28	0.314475	3.64633e-11	0.390531	9.52791e-18	✔	✔
ENST00000466764.5	RBM3	0.366188	3.67843e-15	0.410474	1.10414e-19	✔	✔
ENST00000491240.5	RBM3	0.308154	9.98983e-11	0.408376	1.79543e-19	✔	✔
ENST00000253363.10	RBM39	0.344045	2.36244e-13	0.319436	7.24144e-12		✔
ENST00000361162.10	RBM39	0.391602	1.98155e-17	0.337119	3.44707e-13		✔
ENST00000463004.5	RBM39	0.309255	8.40091e-11	0.506071	7.12651e-31		✔
ENST00000471635.5	RBM39	0.345207	1.91211e-13	0.411031	9.69495e-20		✔
ENST00000477334.1	RBM39	0.359562	1.33706e-14	0.371548	5.02589e-16		✔
ENST00000482563.1	RBM39	0.365126	4.53462e-15	0.55087	2.122e-37		✔
ENST00000492779.5	RBM39	0.351964	5.59469e-14	0.452057	3.85188e-24		✔
ENST00000408993.6	RBM4	0.302436	2.40684e-10	0.300944	1.40174e-10	✔	✔
ENST00000422955.5	RBM6	0.333954	1.40414e-12	0.474017	9.44002e-27	✔	✔
ENST00000442092.5	RBM6	0.383188	1.18953e-16	0.495861	1.65143e-29	✔	✔
ENST00000431446.7	RBMX	0.309903	7.5808e-11	0.4388	1.17657e-22		✔
ENST00000568578.5	RBMX	0.357911	1.82387e-14	0.561474	4.35832e-39		✔
ENST00000373832.5	RCC1	0.420447	2.995e-20	0.310683	3.02017e-11	✔	✔
ENST00000505105.5	RCHY1	0.380681	2.01198e-16	0.318049	9.11504e-12	✔	✔
ENST00000514589.5	RCHY1	0.357699	1.89851e-14	0.447427	1.29434e-23	✔	✔
ENST00000558598.1	RCN2	0.330695	2.4683e-12	0.469298	3.55182e-26	✔	✔
ENST00000525693.5	RELA	0.349812	8.32671e-14	0.426322	2.57493e-21	✔	✔
ENST00000425389.2	REPIN1	0.309369	8.25079e-11	0.436066	2.31325e-22		✔
ENST00000380071.7	RFC3	0.366541	3.43389e-15	0.345352	7.75733e-14	✔	✔
ENST00000296273.6	RFC4	0.326638	4.91565e-12	0.307878	4.72334e-11		✔
ENST00000478610.5	RGL2	0.307114	1.17306e-10	0.554994	4.73921e-38		✔
ENST00000493647.1	RHBDF1	0.321634	1.13252e-11	0.518348	1.37121e-32	✔	✔
ENST00000496004.5	RHEB	0.34403	2.36854e-13	0.341957	1.43943e-13	✔	✔
ENST00000358365.7	RHOT1	0.373011	9.61528e-16	0.389894	1.09375e-17		✔
ENST00000530149.1	RIC8A	0.320417	1.38002e-11	0.544469	1.94348e-36		✔
ENST00000462949.5	RIC8B	0.305979	1.40209e-10	0.38737	1.87698e-17		✔
ENST00000220751.4	RIPK2	0.45079	1.46845e-23	0.354684	1.36569e-14		✔
ENST00000522965.1	RIPK2	0.369826	1.80955e-15	0.334474	5.52142e-13		✔
ENST00000325875.7	RMI1	0.468336	1.28611e-25	0.336142	4.1033e-13		✔
ENST00000487805.6	RNF123	0.306304	1.33195e-10	0.561558	4.25019e-39		✔
ENST00000520564.5	RNF130	0.322521	9.77151e-12	0.459227	5.6362e-25		✔
ENST00000530778.1	RNF139-AS1	0.309046	8.69007e-11	0.55386	7.20971e-38		✔
ENST00000424632.5	RNF149	0.369412	1.9589e-15	0.541105	6.46285e-36	✔	✔
ENST00000215798.10	RNF215	0.314073	3.89995e-11	0.539699	1.03633e-35		✔
ENST00000474064.5	RNF220	0.391436	2.0548e-17	0.389865	1.10035e-17		✔
ENST00000394013.6	RNF41	0.33831	6.58285e-13	0.340268	1.95734e-13	✔	✔
ENST00000547967.5	RNF41	0.339112	5.72444e-13	0.396346	2.67647e-18	✔	✔
ENST00000548120.1	RNF41	0.320616	1.33728e-11	0.492491	4.51697e-29	✔	✔
ENST00000274811.8	RNF44	0.337972	6.98265e-13	0.378815	1.13647e-16		✔
ENST00000508478.1	RNF44	0.302869	2.25683e-10	0.44155	5.86284e-23		✔
ENST00000320225.9	RNPS1	0.452725	8.74853e-24	0.416809	2.49891e-20		✔
ENST00000565870.5	RNPS1	0.319046	1.72947e-11	0.475928	5.54165e-27		✔
ENST00000608049.5	ROCK1P1	0.324504	7.0209e-12	0.375482	2.2619e-16		✔
ENST00000436713.1	RP1-92O14.6	0.312232	5.21848e-11	0.400154	1.15434e-18		✔
ENST00000514048.5	RP11-1023L17.1	0.36428	5.35259e-15	0.406088	3.0266e-19		✔
ENST00000568500.1	RP11-146F11.1	0.335574	1.06002e-12	0.441982	5.24803e-23		✔
ENST00000587128.1	RP11-15A1.3	0.324543	6.97756e-12	0.321879	4.81652e-12		✔
ENST00000469070.1	RP11-18H7.1	0.327791	4.0498e-12	0.420944	9.39622e-21		✔
ENST00000564237.1	RP11-196G18.22	0.400033	3.22221e-18	0.434705	3.25594e-22		✔
ENST00000431724.1	RP11-213G2.3	0.34426	2.27082e-13	0.467965	5.13327e-26		✔
ENST00000562760.1	RP11-22C11.2	0.361508	9.22334e-15	0.380463	8.0679e-17		✔
ENST00000462186.2	RP11-255H23.2	0.32776	4.06998e-12	0.420924	9.43873e-21		✔
ENST00000561542.1	RP11-305E6.4	0.435693	7.13447e-22	0.421341	8.54307e-21		✔
ENST00000572730.1	RP11-334C17.5	0.348296	1.0953e-13	0.608933	2.73737e-47		✔
ENST00000613093.1	RP11-347I19.7	0.310624	6.76393e-11	0.513646	6.28711e-32		✔
ENST00000576963.1	RP11-353N14.2	0.305202	1.58052e-10	0.386425	2.29948e-17		✔
ENST00000524166.1	RP11-37B2.1	0.307094	1.17661e-10	0.443194	3.87335e-23		✔
ENST00000440150.5	RP11-418J17.1	0.336038	9.78356e-13	0.355954	1.07137e-14		✔
ENST00000529743.1	RP11-429J17.7	0.395593	8.49219e-18	0.463395	1.79728e-25		✔
ENST00000433644.2	RP11-435O5.2	0.400541	2.88427e-18	0.321134	5.45882e-12		✔
ENST00000569134.1	RP11-48B3.4	0.357949	1.81318e-14	0.327775	1.76755e-12		✔
ENST00000625121.1	RP11-511H23.2	0.336705	8.71535e-13	0.422463	6.53255e-21		✔
ENST00000551271.5	RP11-521B24.3	0.313201	4.47972e-11	0.316233	1.22859e-11		✔
ENST00000600169.2	RP11-629B11.5	0.30403	1.89188e-10	0.357691	7.69133e-15		✔
ENST00000555968.1	RP11-66N24.3	0.302697	2.31678e-10	0.632777	1.02069e-51		✔
ENST00000498297.1	RP11-723O4.2	0.372982	9.67177e-16	0.533121	9.83329e-35		✔
ENST00000545800.1	RP11-783K16.13	0.366745	3.29741e-15	0.393293	5.22209e-18		✔
ENST00000608661.1	RP11-83A24.2	0.354141	3.72285e-14	0.348086	4.6848e-14		✔
ENST00000400979.2	RP11-9L18.2	0.314488	3.63896e-11	0.372108	4.49049e-16		✔
ENST00000623869.3	RP5-1042K10.14	0.323163	8.79205e-12	0.538584	1.49741e-35		✔
ENST00000609497.5	RP5-1159O4.1	0.300877	3.06568e-10	0.54648	9.70942e-37		✔
ENST00000598368.1	RPARP-AS1	0.305338	1.54872e-10	0.559437	9.3312e-39		✔
ENST00000497825.5	RPL12	0.30233	2.44601e-10	0.321714	4.95116e-12	✔	✔
ENST00000338970.10	RPL14	0.363915	5.75086e-15	0.365498	1.68514e-15		✔
ENST00000579248.5	RPL17	0.325156	6.30096e-12	0.334722	5.28584e-13		✔
ENST00000579495.1	RPL17	0.337389	7.7391e-13	0.410475	1.10414e-19		✔
ENST00000582588.1	RPL17	0.360154	1.19685e-14	0.484389	4.86187e-28		✔
ENST00000547892.1	RPL18	0.30009	3.45091e-10	0.487946	1.73565e-28	✔	✔
ENST00000480661.1	RPL22	0.321382	1.17966e-11	0.494421	2.56366e-29	✔	✔
ENST00000577760.1	RPL23	0.321145	1.22659e-11	0.500527	4.00226e-30		✔
ENST00000584164.5	RPL26	0.328014	3.90667e-12	0.32758	1.82884e-12	✔	✔
ENST00000530585.5	RPL27A	0.320925	1.271e-11	0.373312	3.50778e-16		✔
ENST00000481629.1	RPL29	0.31896	1.75431e-11	0.473624	1.05315e-26		✔
ENST00000521726.1	RPL30	0.315926	2.88834e-11	0.382741	5.00925e-17		✔
ENST00000409711.1	RPL31	0.389673	3.00021e-17	0.558697	1.22541e-38	✔	✔
ENST00000396953.6	RPL32	0.328849	3.38338e-12	0.505419	8.76984e-31		✔
ENST00000465744.5	RPL36A	0.312807	4.761e-11	0.309071	3.90874e-11		✔
ENST00000491851.5	RPL36A	0.377444	3.90409e-16	0.317522	9.94576e-12		✔
ENST00000564647.5	RPL4	0.332123	1.93057e-12	0.500695	3.80379e-30	✔	✔
ENST00000424576.6	RPL6	0.532273	3.0153e-34	0.389603	1.16346e-17	✔	✔
ENST00000546368.2	RPL6	0.385109	7.9441e-17	0.508686	3.12093e-31	✔	✔
ENST00000548343.1	RPL6	0.389357	3.21445e-17	0.424264	4.23064e-21	✔	✔
ENST00000550566.6	RPL6	0.409762	3.60271e-19	0.468997	3.85538e-26	✔	✔
ENST00000551041.6	RPL6	0.389079	3.41777e-17	0.449822	6.90515e-24	✔	✔
ENST00000466821.1	RPL7	0.323116	8.86247e-12	0.42708	2.13751e-21	✔	✔
ENST00000426651.1	RPL7A	0.39597	7.84637e-18	0.528436	4.89298e-34		✔
ENST00000463740.5	RPL7A	0.314035	3.92271e-11	0.407174	2.364e-19		✔
ENST00000468019.5	RPL7A	0.324814	6.66836e-12	0.367218	1.20267e-15		✔
ENST00000485706.5	RPL7A	0.302623	2.34173e-10	0.332174	8.23548e-13		✔
ENST00000304734.9	RPL7L1	0.373793	8.2205e-16	0.325378	2.65977e-12		✔
ENST00000511075.5	RPL9	0.398425	4.62241e-18	0.532945	1.04166e-34		✔
ENST00000228306.8	RPLP0	0.308372	9.65142e-11	0.323641	3.56896e-12	✔	✔
ENST00000552461.5	RPLP0	0.323212	8.72301e-12	0.519831	8.41876e-33	✔	✔
ENST00000591994.1	RPRD1A	0.310993	6.36938e-11	0.369049	8.32438e-16		✔
ENST00000228140.6	RPS13	0.318184	1.99214e-11	0.347962	4.79485e-14		✔
ENST00000312037.5	RPS14	0.370444	1.60407e-15	0.307043	5.39727e-11	✔	✔
ENST00000519855.1	RPS14	0.346892	1.41547e-13	0.401357	8.79748e-19	✔	✔
ENST00000565420.5	RPS15A	0.369958	1.76286e-15	0.370044	6.8187e-16		✔
ENST00000575669.1	RPS15A	0.336864	8.48699e-13	0.409526	1.37579e-19		✔
ENST00000576436.5	RPS15A	0.340066	4.82671e-13	0.463152	1.92038e-25		✔
ENST00000472218.1	RPS18	0.321264	1.20313e-11	0.421984	7.32368e-21		✔
ENST00000490191.5	RPS18	0.40172	2.21806e-18	0.591878	2.92969e-44		✔
ENST00000531065.5	RPS2	0.389738	2.95986e-17	0.443308	3.75729e-23		✔
ENST00000475468.5	RPS24	0.305048	1.61916e-10	0.36763	1.10622e-15	✔	✔
ENST00000482846.1	RPS27L	0.323586	8.21156e-12	0.472517	1.44256e-26		✔
ENST00000554075.1	RPS29	0.307345	1.13103e-10	0.431691	6.89525e-22	✔	✔
ENST00000611563.1	RPS29	0.370018	1.74195e-15	0.356954	8.83779e-15	✔	✔
ENST00000525933.1	RPS3	0.384884	8.33107e-17	0.466154	8.41354e-26		✔
ENST00000507485.1	RPS3A	0.385976	6.62138e-17	0.538937	1.3226e-35		✔
ENST00000486733.2	RPS4X	0.349088	9.45964e-14	0.510573	1.70452e-31		✔
ENST00000380384.5	RPS6	0.355864	2.68974e-14	0.390631	9.32091e-18		✔
ENST00000491616.1	RPS6KC1	0.304591	1.7379e-10	0.385854	2.59152e-17		✔
ENST00000407445.7	RPS7	0.337833	7.15863e-13	0.459521	5.2033e-25	✔	✔
ENST00000481006.1	RPS7	0.399089	4.00163e-18	0.461495	3.03685e-25	✔	✔
ENST00000478027.2	RPSA	0.315363	3.15931e-11	0.453223	2.82321e-24	✔	✔
ENST00000562070.1	RPUSD1	0.326143	5.35031e-12	0.461909	2.70696e-25		✔
ENST00000320270.3	RRS1	0.477877	8.77708e-27	0.369602	7.46041e-16		✔
ENST00000527796.6	RSRC2	0.30667	1.2586e-10	0.464133	1.47445e-25	✔	✔
ENST00000531389.2	RSRC2	0.327876	3.99611e-12	0.492417	4.61813e-29	✔	✔
ENST00000532695.5	RSRC2	0.403607	1.45326e-18	0.379193	1.05007e-16	✔	✔
ENST00000243189.11	RSRP1	0.326285	5.22718e-12	0.368705	8.91586e-16		✔
ENST00000498238.1	RSRP1	0.347515	1.26136e-13	0.600704	7.22048e-46		✔
ENST00000292254.8	RUSC1	0.379711	2.45885e-16	0.488655	1.40931e-28	✔	✔
ENST00000368347.8	RUSC1	0.327244	4.43893e-12	0.389027	1.3188e-17	✔	✔
ENST00000462780.5	RUSC1	0.414828	1.11972e-19	0.562832	2.62863e-39	✔	✔
ENST00000492536.5	RUSC1	0.325444	6.00557e-12	0.429204	1.27608e-21	✔	✔
ENST00000322623.9	RUVBL1	0.437591	4.4428e-22	0.346187	6.63999e-14	✔	✔
ENST00000582176.1	RUVBL1	0.320944	1.26696e-11	0.480349	1.58112e-27	✔	✔
ENST00000478694.1	SAMD10	0.307788	1.05594e-10	0.399548	1.32347e-18		✔
ENST00000314471.10	SAMD4B	0.34292	2.88693e-13	0.314704	1.57894e-11		✔
ENST00000598605.1	SAMD4B	0.315897	2.9024e-11	0.357632	7.77424e-15		✔
ENST00000492245.5	SAP18	0.446846	4.12473e-23	0.369519	7.58347e-16		✔
ENST00000508363.5	SAR1B	0.32349	8.34256e-12	0.492801	4.1521e-29		✔
ENST00000525040.5	SBF2	0.308182	9.94708e-11	0.365727	1.61098e-15	✔	✔
ENST00000341901.4	SBK1	0.406156	8.16795e-19	0.359797	5.12101e-15		✔
ENST00000550893.2	SCAF11	0.407749	5.68601e-19	0.375468	2.26809e-16	✔	✔
ENST00000460215.5	SCMH1	0.330654	2.48591e-12	0.363478	2.50562e-15	✔	✔
ENST00000461862.5	SCNM1	0.421594	2.27941e-20	0.339622	2.19987e-13		✔
ENST00000320476.7	SCRIB	0.355149	3.07705e-14	0.370407	6.3322e-16	✔	✔
ENST00000531942.1	SCRIB	0.416611	7.40969e-20	0.465972	8.84315e-26	✔	✔
ENST00000432641.2	SDHAF3	0.375202	6.16759e-16	0.320415	6.15673e-12		✔
ENST00000505479.1	SEC31A	0.305329	1.55042e-10	0.415781	3.18657e-20	✔	✔
ENST00000509691.1	SEC31A	0.362377	7.78134e-15	0.424734	3.77752e-21	✔	✔
ENST00000395109.6	SEPT5	0.323924	7.74314e-12	0.425784	2.92589e-21		✔
ENST00000455843.5	SEPT5	0.348615	1.03244e-13	0.509094	2.74542e-31		✔
ENST00000425198.1	SEPT7	0.310454	6.94634e-11	0.44362	3.46636e-23	✔	✔
ENST00000413875.5	SEPT7P2	0.381037	1.867e-16	0.517175	2.00123e-32		✔
ENST00000445387.5	SETD2	0.304456	1.7735e-10	0.374903	2.54468e-16	✔	✔
ENST00000407969.5	SETD5	0.325801	5.6696e-12	0.357861	7.43805e-15	✔	✔
ENST00000592839.6	SF3A2	0.304205	1.84268e-10	0.482833	7.6898e-28		✔
ENST00000424674.1	SF3B1	0.303867	1.93965e-10	0.335305	4.76291e-13		✔
ENST00000525207.1	SF3B2	0.349137	9.3789e-14	0.390806	8.97545e-18		✔
ENST00000357214.5	SFPQ	0.492857	1.0653e-28	0.346777	5.96435e-14	✔	✔
ENST00000355697.6	SFXN4	0.358157	1.7414e-14	0.433598	4.29904e-22		✔
ENST00000575484.1	SGSH	0.313383	4.35474e-11	0.568405	3.16782e-40		✔
ENST00000477165.1	SH3GLB2	0.347522	1.26005e-13	0.564906	1.21792e-39	✔	✔
ENST00000403657.5	SH3YL1	0.41804	5.27924e-20	0.409193	1.48611e-19		✔
ENST00000605370.1	SH3YL1	0.339617	5.22394e-13	0.309463	3.67081e-11		✔
ENST00000606715.3	SHANK2	0.345878	1.6924e-13	0.44612	1.81855e-23	✔	✔
ENST00000530216.5	SHARPIN	0.301172	2.92841e-10	0.323189	3.85338e-12		✔
ENST00000534435.1	SHARPIN	0.325279	6.1812e-12	0.33002	1.19705e-12		✔
ENST00000554467.5	SHMT2	0.360854	1.04586e-14	0.494676	2.38215e-29		✔
ENST00000290399.10	SIM2	0.352485	5.08518e-14	0.492034	5.17891e-29		✔
ENST00000318386.8	SLBP	0.37924	2.70183e-16	0.402681	6.55216e-19	✔	✔
ENST00000467972.5	SLC12A9	0.334954	1.17988e-12	0.457469	9.00776e-25	✔	✔
ENST00000480594.1	SLC1A4	0.318982	1.74775e-11	0.465513	1.00435e-25		✔
ENST00000574129.5	SLC25A10	0.313882	4.01803e-11	0.418915	1.52461e-20		✔
ENST00000471795.1	SLC25A14	0.303883	1.93458e-10	0.441554	5.86008e-23		✔
ENST00000265870.7	SLC25A16	0.34945	8.86848e-14	0.466602	7.44492e-26		✔
ENST00000435456.6	SLC25A17	0.395113	9.42248e-18	0.366503	1.38562e-15		✔
ENST00000530360.2	SLC25A22	0.311257	6.101e-11	0.351488	2.48635e-14		✔
ENST00000373068.6	SLC25A25	0.341035	4.05405e-13	0.338797	2.55176e-13		✔
ENST00000302692.6	SLC25A33	0.435396	7.6925e-22	0.341994	1.42953e-13		✔
ENST00000446041.6	SLC25A36	0.31336	4.36986e-11	0.385264	2.93782e-17	✔	✔
ENST00000591006.5	SLC25A39	0.347311	1.31035e-13	0.516411	2.56196e-32		✔
ENST00000525944.1	SLC25A45	0.327019	4.61152e-12	0.463823	1.60091e-25		✔
ENST00000526898.5	SLC25A45	0.342358	3.19244e-13	0.419629	1.28501e-20		✔
ENST00000531791.1	SLC25A45	0.315884	2.90864e-11	0.539505	1.10536e-35		✔
ENST00000482718.1	SLC2A4RG	0.321149	1.22613e-11	0.517507	1.79511e-32		✔
ENST00000480991.1	SLC35E2B	0.314057	3.91003e-11	0.476193	5.1421e-27		✔
ENST00000459683.5	SLC35F5	0.324354	7.19976e-12	0.328181	1.64668e-12		✔
ENST00000464301.1	SLC39A10	0.343967	2.39553e-13	0.548605	4.60104e-37	✔	✔
ENST00000487680.1	SLC44A4	0.305982	1.40165e-10	0.480061	1.71316e-27		✔
ENST00000506037.1	SLC50A1	0.397273	5.93597e-18	0.518387	1.35897e-32	✔	✔
ENST00000310574.7	SLC5A6	0.302464	2.39732e-10	0.342958	1.20188e-13		✔
ENST00000485324.1	SLC6A8	0.393676	1.27684e-17	0.592995	1.93805e-44	✔	✔
ENST00000566712.2	SLX1A-SULT1A3	0.358775	1.55322e-14	0.487868	1.772e-28		✔
ENST00000592604.5	SMARCA4	0.408477	4.82951e-19	0.408117	1.90323e-19		✔
ENST00000469334.5	SMARCE1	0.336794	8.5834e-13	0.381119	7.04428e-17		✔
ENST00000526869.1	SMCO4	0.316775	2.51053e-11	0.356755	9.18428e-15		✔
ENST00000473643.1	SMG5	0.3931	1.43993e-17	0.504454	1.18894e-30	✔	✔
ENST00000476954.1	SMG5	0.35155	6.04366e-14	0.510887	1.53462e-31	✔	✔
ENST00000515829.6	SMG7	0.366121	3.7237e-15	0.314734	1.57115e-11	✔	✔
ENST00000380707.8	SMN1	0.463517	4.78786e-25	0.304642	7.87736e-11		✔
ENST00000514951.5	SMN1	0.440431	2.16746e-22	0.391863	7.15324e-18		✔
ENST00000478558.1	SNAPIN	0.324684	6.81514e-12	0.583221	9.6262e-43		✔
ENST00000537869.5	SNHG1	0.396548	6.90547e-18	0.38077	7.56987e-17		✔
ENST00000538654.5	SNHG1	0.354185	3.69463e-14	0.548358	5.02503e-37		✔
ENST00000539921.5	SNHG1	0.33169	2.08095e-12	0.382393	5.38044e-17		✔
ENST00000545920.1	SNHG1	0.319844	1.51486e-11	0.500953	3.52519e-30		✔
ENST00000626200.2	SNHG14	0.336901	8.43659e-13	0.418991	1.49766e-20		✔
ENST00000577700.5	SNHG15	0.330894	2.38829e-12	0.554598	5.50279e-38		✔
ENST00000449469.5	SNHG17	0.303951	1.91564e-10	0.486339	2.77424e-28		✔
ENST00000434411.5	SNHG20	0.330505	2.5511e-12	0.54881	4.29189e-37		✔
ENST00000413987.1	SNHG3	0.303649	2.00338e-10	0.452949	3.03655e-24		✔
ENST00000507197.5	SNHG4	0.330898	2.38703e-12	0.496986	1.16998e-29		✔
ENST00000447221.1	SNHG7	0.379539	2.54349e-16	0.575287	2.29755e-41		✔
ENST00000450162.6	SNRNP27	0.4116	2.36146e-19	0.304492	8.07291e-11		✔
ENST00000396330.6	SNX16	0.39507	9.48903e-18	0.343095	1.17239e-13		✔
ENST00000519212.1	SNX16	0.311626	5.76292e-11	0.343454	1.09731e-13		✔
ENST00000251775.8	SNX4	0.401804	2.17763e-18	0.314862	1.5393e-11	✔	✔
ENST00000321765.9	SPAG5	0.403514	1.48367e-18	0.355783	1.10631e-14		✔
ENST00000448693.2	SPCS1	0.30282	2.2738e-10	0.397672	1.9988e-18		✔
ENST00000265295.8	SPDL1	0.491602	1.55914e-28	0.324014	3.35196e-12		✔
ENST00000487496.1	SPEN	0.366099	3.73943e-15	0.384992	3.11168e-17		✔
ENST00000524141.5	SPIDR	0.350556	7.25317e-14	0.495694	1.73319e-29	✔	✔
ENST00000541342.2	SPIDR	0.339865	5.00072e-13	0.338064	2.91449e-13	✔	✔
ENST00000505653.1	SPON2	0.337283	7.87943e-13	0.359494	5.42533e-15		✔
ENST00000618220.4	SPPL2B	0.343316	2.69201e-13	0.579796	3.95992e-42	✔	✔
ENST00000532650.1	SPTBN2	0.361443	9.33226e-15	0.458399	7.02365e-25		✔
ENST00000532902.1	SPTBN2	0.39718	6.05287e-18	0.406768	2.59188e-19		✔
ENST00000584760.1	SREBF1	0.332439	1.8271e-12	0.501011	3.46377e-30	✔	✔
ENST00000284041.7	SREK1	0.324112	7.4959e-12	0.308505	4.27592e-11	✔	✔
ENST00000431660.5	SRI	0.324429	7.10512e-12	0.448564	9.59594e-24		✔
ENST00000216774.10	SRP54	0.314355	3.71916e-11	0.31437	1.66696e-11		✔
ENST00000532268.1	SRPR	0.319832	1.51775e-11	0.477057	4.00584e-27		✔
ENST00000582730.6	SRSF1	0.644787	2.58931e-54	0.426922	2.22215e-21	✔	✔
ENST00000370949.1	SRSF11	0.432698	1.51268e-21	0.508567	3.22967e-31	✔	✔
ENST00000461935.1	SRSF11	0.306477	1.29623e-10	0.468656	4.23055e-26	✔	✔
ENST00000469170.5	SRSF11	0.354449	3.51643e-14	0.316937	1.09397e-11	✔	✔
ENST00000392485.2	SRSF2	0.345241	1.90017e-13	0.566263	7.3674e-40		✔
ENST00000555547.5	SRSF5	0.322237	1.02423e-11	0.540907	6.87255e-36	✔	✔
ENST00000483871.6	SRSF6	0.440564	2.09973e-22	0.58574	3.57998e-43	✔	✔
ENST00000443213.5	SRSF7	0.357752	1.88112e-14	0.546323	1.02045e-36		✔
ENST00000331758.7	SS18L1	0.425508	8.81912e-21	0.390232	1.01615e-17	✔	✔
ENST00000492965.5	SSPO	0.348554	1.04383e-13	0.427058	2.14826e-21		✔
ENST00000623373.3	SSPO	0.315287	3.20014e-11	0.450062	6.50761e-24		✔
ENST00000368311.5	SSR2	0.354174	3.70027e-14	0.583268	9.60365e-43		✔
ENST00000472467.1	SSR2	0.308491	9.47397e-11	0.436541	2.0555e-22		✔
ENST00000623234.1	SSSCA1-AS1	0.302281	2.4632e-10	0.500388	4.16881e-30		✔
ENST00000487154.1	STAG3L1	0.33224	1.89245e-12	0.48926	1.17969e-28		✔
ENST00000473757.5	STAG3L5P	0.346868	1.42094e-13	0.570733	1.29265e-40	✔	✔
ENST00000493499.1	STAG3L5P	0.307201	1.15678e-10	0.480378	1.56871e-27	✔	✔
ENST00000310771.8	STAG3L5P-PVRIG2P-PILRB	0.360364	1.15072e-14	0.585301	4.25639e-43		✔
ENST00000394070.6	STAMBP	0.308456	9.52758e-11	0.325839	2.45844e-12		✔
ENST00000297205.6	STEAP1	0.394278	1.12228e-17	0.381025	7.18088e-17		✔
ENST00000475789.1	STEAP1	0.352875	4.72036e-14	0.437921	1.46823e-22		✔
ENST00000433534.1	STEAP2-AS1	0.351376	6.22942e-14	0.478801	2.44224e-27		✔
ENST00000463501.5	STIM2	0.326078	5.40876e-12	0.570724	1.29265e-40		✔
ENST00000479644.1	STK19	0.338343	6.54331e-13	0.393535	4.96096e-18		✔
ENST00000450497.5	STK25	0.307789	1.05594e-10	0.473957	9.59398e-27		✔
ENST00000492127.5	STK25	0.311334	6.03025e-11	0.495354	1.92964e-29		✔
ENST00000480709.1	STK36	0.345353	1.86347e-13	0.492605	4.36818e-29	✔	✔
ENST00000492486.5	STK36	0.415454	9.66791e-20	0.541324	6.00586e-36	✔	✔
ENST00000374291.5	STMN1	0.358234	1.71648e-14	0.311336	2.71935e-11		✔
ENST00000465604.1	STMN1	0.305495	1.51326e-10	0.423286	5.34951e-21		✔
ENST00000415688.1	STRADB	0.381676	1.63162e-16	0.387234	1.93271e-17		✔
ENST00000466770.1	STRADB	0.461095	9.24594e-25	0.523602	2.44012e-33		✔
ENST00000315099.2	STX19	0.383651	1.08033e-16	0.312052	2.4245e-11		✔
ENST00000337979.8	STX3	0.308985	8.7666e-11	0.301072	1.3742e-10		✔
ENST00000452918.6	SUGP2	0.321548	1.14821e-11	0.526609	8.97469e-34	✔	✔
ENST00000340926.7	SUN1	0.300762	3.1207e-10	0.448721	9.21843e-24	✔	✔
ENST00000433212.5	SUN1	0.302304	2.45572e-10	0.346275	6.53443e-14	✔	✔
ENST00000469086.5	SUN2	0.306332	1.32582e-10	0.587033	2.15501e-43		✔
ENST00000394109.7	SUOX	0.352453	5.11382e-14	0.579643	4.16022e-42		✔
ENST00000495071.6	SUPT20H	0.356818	2.23995e-14	0.332303	8.05951e-13		✔
ENST00000304363.8	SUV420H1	0.437891	4.12732e-22	0.333876	6.11908e-13		✔
ENST00000497969.6	SUZ12P1	0.3175	2.22772e-11	0.352631	2.00802e-14	✔	✔
ENST00000465425.1	SYNE4	0.3039	1.93044e-10	0.440943	6.82759e-23		✔
ENST00000589183.1	SYNGR2	0.350759	6.9873e-14	0.44725	1.35387e-23		✔
ENST00000449943.5	SYVN1	0.413494	1.52213e-19	0.614631	2.55908e-48		✔
ENST00000484651.5	TACC3	0.335699	1.03783e-12	0.406826	2.55675e-19	✔	✔
ENST00000620628.4	TADA2A	0.337615	7.43734e-13	0.310446	3.13856e-11		✔
ENST00000361288.8	TAF11	0.378628	3.06991e-16	0.352518	2.05035e-14		✔
ENST00000603067.5	TAF15	0.339877	4.99257e-13	0.430684	8.83723e-22	✔	✔
ENST00000603346.1	TAF15	0.317663	2.17039e-11	0.429504	1.1876e-21	✔	✔
ENST00000605844.5	TAF15	0.368505	2.34993e-15	0.313818	1.82492e-11	✔	✔
ENST00000323981.6	TAF1D	0.327142	4.51649e-12	0.426743	2.3238e-21	✔	✔
ENST00000527068.1	TAF1D	0.336498	9.02901e-13	0.405173	3.72738e-19	✔	✔
ENST00000529435.5	TAF1D	0.378342	3.25656e-16	0.433622	4.27566e-22	✔	✔
ENST00000529900.1	TAF1D	0.335364	1.09906e-12	0.475925	5.54165e-27	✔	✔
ENST00000530769.5	TAF1D	0.343694	2.51655e-13	0.556699	2.51698e-38	✔	✔
ENST00000252996.8	TAF4	0.443593	9.63575e-23	0.305915	6.44488e-11	✔	✔
ENST00000472509.5	TAF6	0.363225	6.59026e-15	0.417615	2.07266e-20		✔
ENST00000313368.7	TAF7	0.414671	1.15883e-19	0.311352	2.71271e-11		✔
ENST00000040877.1	TARBP1	0.327981	3.92719e-12	0.373282	3.52759e-16	✔	✔
ENST00000462259.5	TARBP1	0.345897	1.68675e-13	0.475539	6.18545e-27	✔	✔
ENST00000483404.5	TARBP1	0.338979	5.85522e-13	0.575627	2.04625e-41	✔	✔
ENST00000552650.5	TARBP2	0.314262	3.77768e-11	0.475076	7.03728e-27	✔	✔
ENST00000507716.5	TARS	0.346006	1.65413e-13	0.337365	3.30143e-13	✔	✔
ENST00000276692.10	TATDN1	0.446201	4.85349e-23	0.398956	1.50665e-18		✔
ENST00000376840.8	TBC1D8	0.315085	3.30775e-11	0.435968	2.37057e-22	✔	✔
ENST00000520794.1	TBC1D9B	0.304474	1.76853e-10	0.540179	8.84032e-36		✔
ENST00000484326.1	TBRG4	0.336391	9.19583e-13	0.501305	3.16494e-30		✔
ENST00000488222.5	TBRG4	0.397921	5.16001e-18	0.484186	5.16295e-28		✔
ENST00000340892.9	TC2N	0.343681	2.52156e-13	0.345746	7.2106e-14	✔	✔
ENST00000521604.6	TCEA1	0.338369	6.51498e-13	0.300932	1.40428e-10	✔	✔
ENST00000518127.5	TCEB1	0.453623	6.86984e-24	0.313667	1.87001e-11		✔
ENST00000519082.5	TCEB1	0.420632	2.86718e-20	0.307627	4.91562e-11		✔
ENST00000520242.5	TCEB1	0.561747	1.01116e-38	0.309707	3.53003e-11		✔
ENST00000296702.9	TCERG1	0.432461	1.6063e-21	0.379494	9.85885e-17	✔	✔
ENST00000509787.1	TCERG1	0.372589	1.04757e-15	0.475553	6.16527e-27	✔	✔
ENST00000404876.1	TCF20	0.336186	9.53699e-13	0.365772	1.59703e-15	✔	✔
ENST00000543371.5	TCF7L2	0.303864	1.94009e-10	0.309546	3.62235e-11		✔
ENST00000580840.1	TEFM	0.324591	6.9203e-12	0.410183	1.17996e-19		✔
ENST00000262319.10	TELO2	0.319254	1.67285e-11	0.46706	6.57129e-26		✔
ENST00000467424.5	TESK1	0.315389	3.14736e-11	0.502853	1.95872e-30		✔
ENST00000409262.7	TET3	0.319277	1.66668e-11	0.325457	2.62522e-12	✔	✔
ENST00000415259.5	TEX264	0.317737	2.1443e-11	0.399087	1.46587e-18		✔
ENST00000541990.5	THBS3	0.304426	1.78166e-10	0.435087	2.955e-22	✔	✔
ENST00000577552.5	THOC1	0.377474	3.88228e-16	0.352385	2.10169e-14		✔
ENST00000578529.5	THOC1	0.313441	4.3167e-11	0.442593	4.49659e-23		✔
ENST00000441692.5	THOC2	0.34637	1.55173e-13	0.384805	3.23557e-17	✔	✔
ENST00000464161.1	THOC2	0.342024	3.38873e-13	0.428732	1.4307e-21	✔	✔
ENST00000496830.1	THOC2	0.323422	8.43867e-12	0.382864	4.87782e-17	✔	✔
ENST00000282574.8	TIA1	0.331859	2.0199e-12	0.443043	4.02346e-23		✔
ENST00000454815.6	TIA1	0.324465	7.06529e-12	0.471868	1.73011e-26		✔
ENST00000369087.5	TIAL1	0.303561	2.03052e-10	0.464817	1.21801e-25	✔	✔
ENST00000396862.1	TIGD7	0.34317	2.76214e-13	0.361917	3.39681e-15		✔
ENST00000229201.4	TIMELESS	0.3243	7.26537e-12	0.316433	1.18894e-11		✔
ENST00000270538.7	TIMM44	0.321513	1.15485e-11	0.34164	1.52528e-13	✔	✔
ENST00000469324.1	TIMMDC1	0.359745	1.2927e-14	0.439753	9.23032e-23		✔
ENST00000359766.7	TLK1	0.38127	1.77504e-16	0.348498	4.34134e-14		✔
ENST00000527851.5	TM7SF2	0.395885	7.98584e-18	0.389268	1.25059e-17	✔	✔
ENST00000530650.5	TM7SF2	0.343019	2.83774e-13	0.440549	7.52964e-23	✔	✔
ENST00000479126.1	TMA7	0.433195	1.33667e-21	0.466435	7.7769e-26		✔
ENST00000509052.2	TMED2	0.315682	3.0023e-11	0.432033	6.33782e-22		✔
ENST00000457408.6	TMED4	0.378181	3.36246e-16	0.329762	1.25095e-12		✔
ENST00000477639.5	TMED4	0.333448	1.53332e-12	0.454576	1.97022e-24		✔
ENST00000525353.5	TMEM126A	0.368561	2.32436e-15	0.355116	1.25752e-14		✔
ENST00000534341.1	TMEM126B	0.340298	4.63001e-13	0.453438	2.66476e-24		✔
ENST00000476253.1	TMEM129	0.314663	3.53632e-11	0.482632	8.1397e-28		✔
ENST00000480360.1	TMEM129	0.301231	2.90562e-10	0.35076	2.846e-14		✔
ENST00000544098.1	TMEM132A	0.31089	6.47617e-11	0.435625	2.58507e-22	✔	✔
ENST00000501408.6	TMEM134	0.373425	8.84516e-16	0.609205	2.56538e-47		✔
ENST00000515780.6	TMEM150C	0.358495	1.63739e-14	0.390453	9.68504e-18		✔
ENST00000509575.1	TMEM165	0.340564	4.4085e-13	0.419031	1.48311e-20		✔
ENST00000418785.5	TMEM168	0.310023	7.4433e-11	0.362907	2.80134e-15	✔	✔
ENST00000505734.1	TMEM175	0.321904	1.0833e-11	0.500943	3.53063e-30		✔
ENST00000532345.1	TMEM179B	0.307038	1.18736e-10	0.419864	1.21584e-20		✔
ENST00000543891.5	TMEM183A	0.366442	3.49877e-15	0.360607	4.3836e-15		✔
ENST00000261455.8	TMEM206	0.318029	2.0423e-11	0.31631	1.21347e-11	✔	✔
ENST00000525631.1	TMEM223	0.309	8.74962e-11	0.420276	1.10171e-20		✔
ENST00000379283.6	TMEM230	0.353908	3.8916e-14	0.33029	1.14318e-12		✔
ENST00000379299.6	TMEM230	0.351432	6.1728e-14	0.327674	1.79837e-12		✔
ENST00000487174.1	TMEM234	0.397792	5.29138e-18	0.458954	6.07123e-25		✔
ENST00000533627.5	TMEM25	0.328011	3.90727e-12	0.520266	7.35421e-33	✔	✔
ENST00000257262.12	TMEM258	0.454223	5.899e-24	0.397205	2.21598e-18		✔
ENST00000543510.1	TMEM258	0.367559	2.82409e-15	0.528188	5.31806e-34		✔
ENST00000533867.1	TMEM41B	0.329584	2.98655e-12	0.389855	1.10247e-17		✔
ENST00000536219.5	TMEM5	0.341975	3.41821e-13	0.352453	2.07526e-14		✔
ENST00000374343.4	TMEM57	0.351467	6.13801e-14	0.342666	1.26694e-13		✔
ENST00000372025.4	TMEM69	0.455466	4.21943e-24	0.412695	6.57374e-20		✔
ENST00000416961.6	TMEM70	0.303844	1.9455e-10	0.30657	5.81688e-11		✔
ENST00000342624.9	TMTC4	0.325609	5.84984e-12	0.350458	3.00712e-14		✔
ENST00000524972.5	TMX2	0.355206	3.04792e-14	0.41319	5.86053e-20	✔	✔
ENST00000333602.10	TNK2	0.301371	2.8428e-10	0.473179	1.1939e-26	✔	✔
ENST00000420716.2	TNK2	0.300421	3.28848e-10	0.399711	1.27657e-18	✔	✔
ENST00000447060.5	TNK2	0.324497	7.02833e-12	0.457888	8.06569e-25	✔	✔
ENST00000468680.1	TNK2	0.335945	9.94843e-13	0.513509	6.56196e-32	✔	✔
ENST00000489628.1	TNK2	0.371815	1.22444e-15	0.54906	3.96387e-37	✔	✔
ENST00000572405.5	TOM1L1	0.387685	4.58838e-17	0.30193	1.20408e-10		✔
ENST00000444502.5	TOP3B	0.338276	6.61703e-13	0.496908	1.198e-29	✔	✔
ENST00000260810.9	TOPBP1	0.320955	1.26538e-11	0.301944	1.20165e-10		✔
ENST00000505804.1	TOPBP1	0.305141	1.59584e-10	0.350594	2.93093e-14		✔
ENST00000613005.4	TOX4	0.314896	3.40855e-11	0.548974	4.07468e-37		✔
ENST00000524774.1	TP53I11	0.303752	1.97202e-10	0.466855	6.95172e-26		✔
ENST00000532921.1	TP53I11	0.311585	5.79565e-11	0.437832	1.5015e-22		✔
ENST00000342697.4	TP53INP1	0.305934	1.41237e-10	0.311343	2.71619e-11		✔
ENST00000379097.7	TPD52	0.414784	1.1311e-19	0.41953	1.31491e-20	✔	✔
ENST00000474176.2	TPD52L2	0.315751	2.96918e-11	0.531472	1.72066e-34		✔
ENST00000495834.1	TPI1	0.383916	1.02416e-16	0.498941	6.46012e-30		✔
ENST00000404484.8	TPM1	0.387858	4.43318e-17	0.335713	4.42817e-13	✔	✔
ENST00000466153.5	TPP2	0.413815	1.41524e-19	0.307079	5.36684e-11		✔
ENST00000494255.5	TRA2A	0.339466	5.36664e-13	0.497783	9.18755e-30		✔
ENST00000492417.5	TRA2B	0.300377	3.30979e-10	0.448672	9.32308e-24		✔
ENST00000584944.5	TRAF4	0.371193	1.38669e-15	0.590087	6.07349e-44	✔	✔
ENST00000575671.5	TRAP1	0.313006	4.61791e-11	0.511521	1.25144e-31	✔	✔
ENST00000497251.1	TRAPPC3	0.307824	1.05065e-10	0.32049	6.08052e-12		✔
ENST00000366699.3	TRIM11	0.304181	1.84926e-10	0.412579	6.75276e-20	✔	✔
ENST00000481474.5	TRIM27	0.376855	4.39425e-16	0.592933	1.93805e-44		✔
ENST00000498117.1	TRIM27	0.310015	7.44966e-11	0.417668	2.0485e-20		✔
ENST00000530724.1	TRIM3	0.403174	1.60405e-18	0.551184	1.90098e-37		✔
ENST00000282369.7	TRIM36	0.372104	1.15455e-15	0.383757	4.03598e-17		✔
ENST00000513154.5	TRIM36	0.316831	2.48816e-11	0.349528	3.58057e-14		✔
ENST00000513146.1	TRIM52	0.35233	5.22754e-14	0.518225	1.42798e-32		✔
ENST00000531717.1	TRIM68	0.341905	3.46376e-13	0.472837	1.31493e-26		✔
ENST00000344135.5	TRIO	0.351852	5.71252e-14	0.458661	6.56385e-25	✔	✔
ENST00000166345.7	TRIP13	0.480806	3.70851e-27	0.335642	4.48267e-13		✔
ENST00000519069.5	TRIQK	0.367273	2.98302e-15	0.317432	1.00934e-11		✔
ENST00000521988.5	TRIQK	0.412352	1.99173e-19	0.360758	4.25709e-15		✔
ENST00000394877.7	TRMT10A	0.408434	4.87561e-19	0.336858	3.61294e-13		✔
ENST00000370141.6	TRMT13	0.32044	1.37497e-11	0.432646	5.44605e-22		✔
ENST00000381019.3	TRMU	0.332724	1.73589e-12	0.396784	2.42953e-18		✔
ENST00000551245.5	TROAP	0.39615	7.55545e-18	0.360803	4.21975e-15		✔
ENST00000466594.1	TRPM8	0.308273	9.80178e-11	0.412254	7.28691e-20		✔
ENST00000539595.5	TRPT1	0.388926	3.53435e-17	0.490003	9.44724e-29		✔
ENST00000456197.1	TRRAP	0.394075	1.17219e-17	0.334985	5.04288e-13		✔
ENST00000460320.1	TRUB2	0.333474	1.52625e-12	0.3316	9.10841e-13		✔
ENST00000402228.7	TSEN2	0.33912	5.71816e-13	0.327877	1.73679e-12	✔	✔
ENST00000302937.8	TSEN34	0.356858	2.22339e-14	0.346605	6.15361e-14		✔
ENST00000496583.1	TSEN34	0.375406	5.91232e-16	0.536133	3.53185e-35		✔
ENST00000464459.1	TSGA10	0.342983	2.85548e-13	0.369472	7.65338e-16		✔
ENST00000262067.4	TSPAN13	0.544181	5.33212e-36	0.314645	1.59415e-11		✔
ENST00000546922.1	TSPAN31	0.313868	4.02662e-11	0.322228	4.53656e-12		✔
ENST00000532308.5	TSTA3	0.313041	4.59258e-11	0.366997	1.25537e-15		✔
ENST00000486084.1	TSTD1	0.337989	6.96279e-13	0.511746	1.16619e-31		✔
ENST00000296015.8	TTC14	0.303536	2.03784e-10	0.423395	5.21609e-21		✔
ENST00000382584.8	TTC14	0.30973	7.79344e-11	0.489762	1.01391e-28		✔
ENST00000553443.5	TTC6	0.301568	2.75715e-10	0.57888	5.59161e-42		✔
ENST00000294161.10	TTC9C	0.33506	1.16022e-12	0.312347	2.31257e-11		✔
ENST00000587807.5	TXNL1	0.392	1.81941e-17	0.395253	3.40928e-18		✔
ENST00000450554.6	U2AF2	0.566712	1.77667e-39	0.442581	4.50778e-23		✔
ENST00000439898.1	U73166.2	0.333537	1.51055e-12	0.57205	8.08279e-41		✔
ENST00000367924.1	UAP1	0.405642	9.13933e-19	0.305321	7.07691e-11		✔
ENST00000490869.1	UBA1	0.321386	1.17948e-11	0.421361	8.50677e-21		✔
ENST00000361055.8	UBA3	0.325498	5.95705e-12	0.302611	1.08235e-10		✔
ENST00000468227.5	UBA5	0.301178	2.92617e-10	0.473249	1.17135e-26		✔
ENST00000379235.5	UBAP2	0.327906	3.97613e-12	0.425973	2.79144e-21	✔	✔
ENST00000484819.1	UBAP2L	0.374891	6.57706e-16	0.43136	7.48239e-22	✔	✔
ENST00000371558.6	UBE2A	0.328152	3.8203e-12	0.332277	8.09428e-13		✔
ENST00000371569.6	UBE2A	0.308805	9.00829e-11	0.468059	4.99693e-26		✔
ENST00000511807.1	UBE2B	0.335317	1.10809e-12	0.363881	2.3156e-15		✔
ENST00000306627.7	UBE2E1	0.369536	1.9118e-15	0.332221	8.17269e-13	✔	✔
ENST00000481546.1	UBE2G2	0.312787	4.77725e-11	0.574041	3.78406e-41	✔	✔
ENST00000403747.6	UBE2I	0.39489	9.85425e-18	0.308412	4.33732e-11	✔	✔
ENST00000477894.5	UBE2J2	0.317075	2.3896e-11	0.373577	3.32574e-16	✔	✔
ENST00000318066.6	UBE2N	0.343455	2.62485e-13	0.304365	8.23699e-11	✔	✔
ENST00000549490.1	UBE2N	0.421662	2.24529e-20	0.341282	1.62888e-13	✔	✔
ENST00000549833.1	UBE2N	0.418346	4.90275e-20	0.314078	1.74918e-11	✔	✔
ENST00000550657.1	UBE2N	0.541817	1.22082e-35	0.300477	1.50685e-10	✔	✔
ENST00000552442.1	UBE2N	0.351156	6.49579e-14	0.340762	1.78995e-13	✔	✔
ENST00000587845.5	UBE2S	0.409687	3.65633e-19	0.320602	5.9653e-12	✔	✔
ENST00000371674.7	UBE2V1	0.381512	1.68907e-16	0.328638	1.52075e-12	✔	✔
ENST00000527373.1	UBQLN1	0.31317	4.50022e-11	0.407607	2.14112e-19		✔
ENST00000499653.1	UBR5-AS1	0.397002	6.28783e-18	0.377571	1.46926e-16		✔
ENST00000367879.8	UCK2	0.440928	1.91368e-22	0.385515	2.78605e-17	✔	✔
ENST00000492660.1	UCKL1	0.301468	2.8012e-10	0.477427	3.61748e-27	✔	✔
ENST00000484980.5	UNC119	0.308514	9.43928e-11	0.470999	2.21966e-26		✔
ENST00000375299.7	UPF3A	0.357079	2.13311e-14	0.329892	1.22386e-12		✔
ENST00000518876.1	UQCRB	0.342589	3.06494e-13	0.436309	2.1776e-22		✔
ENST00000336086.10	URGCP	0.305181	1.58561e-10	0.482697	7.99446e-28	✔	✔
ENST00000462490.5	UROS	0.325559	5.89589e-12	0.38777	1.7237e-17		✔
ENST00000578942.5	USP14	0.342859	2.91716e-13	0.459812	4.81206e-25		✔
ENST00000487163.5	USP21	0.305227	1.57466e-10	0.457718	8.42772e-25		✔
ENST00000478932.1	USP25	0.327725	4.09187e-12	0.507218	4.93744e-31		✔
ENST00000533928.1	USP33	0.310044	7.42068e-11	0.416835	2.4839e-20		✔
ENST00000529813.1	USP47	0.406876	6.92317e-19	0.494218	2.7093e-29	✔	✔
ENST00000418501.5	USP54	0.310226	7.20595e-11	0.352089	2.22148e-14		✔
ENST00000563961.5	USP7	0.393775	1.25381e-17	0.359931	4.99517e-15		✔
ENST00000261708.8	UTP6	0.305089	1.60882e-10	0.422902	5.87122e-21		✔
ENST00000406606.7	VAV2	0.324027	7.60763e-12	0.378683	1.16822e-16	✔	✔
ENST00000395047.6	VDAC1	0.304376	1.79505e-10	0.313483	1.92649e-11	✔	✔
ENST00000261219.7	VEZT	0.349793	8.34602e-14	0.451762	4.16688e-24	✔	✔
ENST00000345392.2	VHL	0.334376	1.30415e-12	0.367362	1.16784e-15		✔
ENST00000498102.1	VIPR1	0.365093	4.56252e-15	0.584531	5.73967e-43		✔
ENST00000335891.5	VPRBP	0.395779	8.17294e-18	0.330205	1.16023e-12		✔
ENST00000357409.9	VPS13A	0.346715	1.45945e-13	0.347171	5.54637e-14		✔
ENST00000493587.1	VPS13B	0.382238	1.45112e-16	0.383347	4.3975e-17	✔	✔
ENST00000551655.1	VPS29	0.334257	1.33186e-12	0.49229	4.79532e-29		✔
ENST00000301765.9	VPS37C	0.37698	4.29005e-16	0.48322	6.85477e-28	✔	✔
ENST00000536000.1	VPS37C	0.360572	1.10513e-14	0.500776	3.71833e-30	✔	✔
ENST00000477558.1	VPS45	0.346607	1.48802e-13	0.465861	9.10967e-26		✔
ENST00000533656.1	VPS51	0.340181	4.73242e-13	0.474653	7.94168e-27	✔	✔
ENST00000461743.1	VPS52	0.341713	3.58505e-13	0.424357	4.1366e-21		✔
ENST00000409558.8	VPS54	0.340529	4.43354e-13	0.399942	1.21155e-18	✔	✔
ENST00000416400.1	VPS54	0.322082	1.0508e-11	0.416895	2.44953e-20	✔	✔
ENST00000528337.1	WAC-AS1	0.321752	1.11135e-11	0.44609	1.83171e-23		✔
ENST00000425179.2	WDFY3	0.492558	1.16855e-28	0.466495	7.65781e-26	✔	✔
ENST00000497136.6	WDR11	0.319406	1.63107e-11	0.528282	5.15768e-34		✔
ENST00000603658.1	WDR11	0.305337	1.54872e-10	0.354483	1.41863e-14		✔
ENST00000479279.5	WDR13	0.37879	2.96959e-16	0.569924	1.76321e-40		✔
ENST00000358625.3	WDR5	0.350499	7.33032e-14	0.375648	2.18651e-16	✔	✔
ENST00000314761.8	WDR75	0.406987	6.75641e-19	0.366585	1.36301e-15		✔
ENST00000427960.5	WDR75	0.321007	1.25545e-11	0.513807	5.98673e-32		✔
ENST00000235090.9	WDR77	0.350194	7.75256e-14	0.332162	8.25256e-13		✔
ENST00000546923.1	WDR90	0.31028	7.14765e-11	0.515928	2.98777e-32		✔
ENST00000549024.5	WDR90	0.344332	2.24235e-13	0.346004	6.87031e-14		✔
ENST00000552943.5	WDR90	0.322688	9.51271e-12	0.498076	8.44218e-30		✔
ENST00000553080.1	WDR90	0.314031	3.9237e-11	0.496493	1.35894e-29		✔
ENST00000382891.9	WHSC1	0.515896	6.99573e-32	0.459281	5.55762e-25	✔	✔
ENST00000514045.5	WHSC1	0.343849	2.44788e-13	0.329428	1.32531e-12	✔	✔
ENST00000540885.1	WNK1	0.310242	7.18905e-11	0.378376	1.24607e-16	✔	✔
ENST00000471223.1	WRAP73	0.300031	3.48164e-10	0.541394	5.87646e-36		✔
ENST00000522140.1	WWC1	0.325498	5.95705e-12	0.375205	2.39316e-16	✔	✔
ENST00000524228.5	WWC1	0.325055	6.40871e-12	0.367545	1.12577e-15	✔	✔
ENST00000461407.5	XPO1	0.313334	4.38615e-11	0.366207	1.46703e-15	✔	✔
ENST00000332707.9	XPOT	0.405849	8.76008e-19	0.366058	1.51152e-15	✔	✔
ENST00000542958.5	XPOT	0.336064	9.73846e-13	0.433462	4.44816e-22	✔	✔
ENST00000495707.1	XRCC2	0.441759	1.55619e-22	0.375607	2.2046e-16		✔
ENST00000495673.1	YPEL5	0.356463	2.39529e-14	0.43244	5.73237e-22		✔
ENST00000373044.2	YRDC	0.401174	2.50176e-18	0.353072	1.8497e-14		✔
ENST00000512600.1	YTHDC2	0.365545	4.17391e-15	0.357156	8.50765e-15	✔	✔
ENST00000353245.7	YWHAZ	0.375102	6.29286e-16	0.30946	3.6717e-11	✔	✔
ENST00000418997.1	YWHAZ	0.32068	1.32293e-11	0.34471	8.7089e-14	✔	✔
ENST00000492736.1	YWHAZ	0.365267	4.40918e-15	0.331218	9.73312e-13	✔	✔
ENST00000554804.1	YY1	0.417563	5.90811e-20	0.312928	2.1065e-11		✔
ENST00000623799.1	YY1	0.379745	2.44282e-16	0.479696	1.88511e-27		✔
ENST00000426744.5	ZBTB10	0.397107	6.14916e-18	0.326356	2.25456e-12		✔
ENST00000430430.5	ZBTB10	0.385938	6.67344e-17	0.369708	7.30381e-16		✔
ENST00000622512.1	ZBTB18	0.35873	1.56633e-14	0.395562	3.18313e-18		✔
ENST00000596739.1	ZBTB45	0.303861	1.94069e-10	0.458117	7.58506e-25		✔
ENST00000367210.1	ZC3H11A	0.396653	6.75247e-18	0.397101	2.26695e-18		✔
ENST00000575984.1	ZC3H7A	0.32209	1.04957e-11	0.431964	6.44485e-22	✔	✔
ENST00000277141.10	ZCCHC6	0.329528	3.01519e-12	0.377224	1.57947e-16		✔
ENST00000254037.6	ZCCHC9	0.304728	1.70138e-10	0.481877	1.01113e-27		✔
ENST00000503758.6	ZDHHC11	0.303539	2.03735e-10	0.379507	9.83703e-17		✔
ENST00000380916.8	ZDHHC21	0.362712	7.2832e-15	0.392571	6.12144e-18		✔
ENST00000369405.7	ZDHHC6	0.319891	1.50439e-11	0.314425	1.65229e-11		✔
ENST00000220669.9	ZFAND1	0.42281	1.69808e-20	0.305604	6.7678e-11		✔
ENST00000524305.5	ZFAND1	0.413884	1.39526e-19	0.342511	1.30173e-13		✔
ENST00000550963.1	ZFC3H1	0.341246	3.89713e-13	0.449939	6.70305e-24	✔	✔
ENST00000512132.5	ZFP62	0.429929	2.9833e-21	0.41586	3.12941e-20	✔	✔
ENST00000507465.1	ZFR	0.353228	4.41777e-14	0.344349	9.30991e-14		✔
ENST00000309315.8	ZMIZ2	0.368249	2.46948e-15	0.353739	1.63198e-14		✔
ENST00000478045.5	ZMIZ2	0.309616	7.92793e-11	0.497961	8.73903e-30		✔
ENST00000382870.7	ZMYM2	0.409196	4.08596e-19	0.382491	5.27408e-17		✔
ENST00000337963.8	ZMYM5	0.333623	1.48802e-12	0.325435	2.63479e-12		✔
ENST00000471957.1	ZMYND19	0.355478	2.89447e-14	0.521929	4.24193e-33		✔
ENST00000586602.5	ZNF121	0.395106	9.42909e-18	0.511878	1.11697e-31		✔
ENST00000340684.10	ZNF124	0.303176	2.15485e-10	0.326798	2.09189e-12		✔
ENST00000599148.1	ZNF132	0.320157	1.44044e-11	0.328827	1.47153e-12		✔
ENST00000355557.6	ZNF140	0.334994	1.17412e-12	0.416116	2.94363e-20		✔
ENST00000536790.5	ZNF140	0.370937	1.45591e-15	0.415907	3.09452e-20		✔
ENST00000579770.1	ZNF141	0.333082	1.63194e-12	0.442722	4.35727e-23		✔
ENST00000572544.1	ZNF174	0.312814	4.75849e-11	0.424079	4.41443e-21		✔
ENST00000399602.8	ZNF195	0.368331	2.43134e-15	0.363394	2.54606e-15		✔
ENST00000394673.6	ZNF207	0.413677	1.46016e-19	0.335441	4.64851e-13		✔
ENST00000579810.2	ZNF207	0.346321	1.56467e-13	0.475525	6.20536e-27		✔
ENST00000584696.1	ZNF207	0.317702	2.15733e-11	0.376659	1.77387e-16		✔
ENST00000591019.5	ZNF227	0.32323	8.70249e-12	0.379064	1.07868e-16		✔
ENST00000292562.11	ZNF251	0.309534	8.03406e-11	0.369856	7.08291e-16	✔	✔
ENST00000525191.2	ZNF251	0.326306	5.20894e-12	0.467507	5.82612e-26	✔	✔
ENST00000530353.1	ZNF251	0.33893	5.90289e-13	0.564798	1.2609e-39	✔	✔
ENST00000534834.1	ZNF26	0.318508	1.88878e-11	0.459247	5.60747e-25		✔
ENST00000573578.1	ZNF263	0.344846	2.0433e-13	0.437707	1.54765e-22	✔	✔
ENST00000588221.5	ZNF266	0.359879	1.26012e-14	0.474035	9.39662e-27	✔	✔
ENST00000591213.1	ZNF266	0.324752	6.73478e-12	0.470875	2.29318e-26	✔	✔
ENST00000595146.1	ZNF274	0.334047	1.38198e-12	0.538924	1.32368e-35		✔
ENST00000370978.8	ZNF280C	0.314632	3.55332e-11	0.312186	2.373e-11		✔
ENST00000544719.6	ZNF285	0.346001	1.65514e-13	0.39676	2.44067e-18		✔
ENST00000299667.8	ZNF3	0.347908	1.17784e-13	0.306035	6.32246e-11		✔
ENST00000340281.8	ZNF326	0.423476	1.44647e-20	0.327278	1.92672e-12	✔	✔
ENST00000335815.6	ZNF354A	0.427957	4.88016e-21	0.342336	1.3441e-13		✔
ENST00000311048.11	ZNF431	0.315873	2.91326e-11	0.330415	1.11886e-12		✔
ENST00000301547.9	ZNF443	0.359189	1.43684e-14	0.311684	2.5721e-11		✔
ENST00000323703.10	ZNF513	0.429562	3.27092e-21	0.546655	9.12483e-37	✔	✔
ENST00000591340.5	ZNF529	0.319461	1.61654e-11	0.344484	9.0806e-14		✔
ENST00000599604.1	ZNF547	0.317125	2.37008e-11	0.332209	8.19028e-13		✔
ENST00000325134.9	ZNF550	0.308151	9.9916e-11	0.357117	8.56888e-15		✔
ENST00000344222.5	ZNF550	0.366905	3.20138e-15	0.423358	5.25969e-21		✔
ENST00000447310.5	ZNF550	0.308151	9.9916e-11	0.357117	8.56888e-15		✔
ENST00000451802.6	ZNF571	0.313435	4.32051e-11	0.308159	4.51822e-11		✔
ENST00000392321.3	ZNF605	0.309834	7.66009e-11	0.346876	5.85738e-14		✔
ENST00000310898.5	ZNF621	0.334003	1.39295e-12	0.349146	3.84508e-14		✔
ENST00000487638.5	ZNF638	0.381326	1.75512e-16	0.402006	7.6181e-19	✔	✔
ENST00000337815.8	ZNF664	0.378156	3.37847e-16	0.324628	3.02246e-12	✔	✔
ENST00000601365.1	ZNF682	0.337352	7.78522e-13	0.467645	5.61137e-26		✔
ENST00000478107.5	ZNF692	0.329472	3.04312e-12	0.479795	1.83831e-27	✔	✔
ENST00000330143.7	ZNF696	0.405129	1.02634e-18	0.414468	4.34939e-20		✔
ENST00000519882.5	ZNF706	0.359212	1.43124e-14	0.437964	1.45299e-22		✔
ENST00000356929.3	ZNF708	0.320441	1.37491e-11	0.354569	1.39552e-14		✔
ENST00000596053.5	ZNF714	0.315577	3.05145e-11	0.331386	9.44835e-13		✔
ENST00000338977.5	ZNF721	0.498472	1.87322e-29	0.394619	3.91781e-18		✔
ENST00000596530.1	ZNF737	0.333215	1.59454e-12	0.304822	7.65546e-11		✔
ENST00000498240.6	ZNF75A	0.313104	4.54419e-11	0.334575	5.42328e-13		✔
ENST00000575253.1	ZNF75A	0.338708	6.14114e-13	0.482493	8.47032e-28		✔
ENST00000373953.7	ZNF76	0.342388	3.17586e-13	0.521546	4.79358e-33		✔
ENST00000486891.5	ZNF76	0.300493	3.25283e-10	0.462584	2.24597e-25		✔
ENST00000317178.9	ZNF776	0.313344	4.38017e-11	0.337653	3.13441e-13		✔
ENST00000451849.1	ZNF776	0.350956	6.74272e-14	0.34332	1.12499e-13		✔
ENST00000481138.5	ZNF782	0.387787	4.49945e-17	0.453252	2.80154e-24		✔
ENST00000430385.3	ZNF799	0.431641	1.95379e-21	0.358603	6.43775e-15		✔
ENST00000460935.1	ZNF799	0.327224	4.4517e-12	0.45865	6.57011e-25		✔
ENST00000361952.4	ZNF830	0.306371	1.31778e-10	0.349728	3.44736e-14		✔
ENST00000539354.5	ZNF84	0.356943	2.18893e-14	0.43751	1.62653e-22	✔	✔
ENST00000593341.1	ZNF91	0.355402	2.93725e-14	0.385854	2.59152e-17		✔
ENST00000597458.1	ZNF91	0.362767	7.2041e-15	0.494546	2.47343e-29		✔
ENST00000617429.4	ZNHIT3	0.385688	7.02972e-17	0.3509	2.77307e-14		✔
ENST00000477096.1	ZRANB2	0.301662	2.71645e-10	0.490907	7.20112e-29		✔
ENST00000396827.3	ZSCAN12	0.303898	1.93071e-10	0.313756	1.84373e-11		✔
ENST00000340487.4	ZSCAN16	0.414653	1.16188e-19	0.410258	1.1605e-19		✔
ENST00000494312.5	ZWINT	0.331973	1.98083e-12	0.437704	1.54807e-22		✔
a Found in human MCF7 and MDA-MB-231 breast cancer cells and MCF10A breast epithelial cells
b Based on the RMBase database (Xuan JJ, Sun WJ, Lin PH, et al. Nucleic Acids Res. 2018;46(D1):D327-D334)
