# Supplementary material for: Systematic Investigation of mRNA N6-Methyladenosine Machinery in Primary Prostate Cancer
Source: Dis Markers. 2020 Nov 12;2020:8833438. doi: 10.1155/2020/8833438 (PMC7676945; doi:10.1155/2020/8833438)
Supplement: Supplementary Materials — include a word file, six figures, and nine spreadsheets. The supplementary materials.docx includes four tables and provides a description for each supplementary material file. [file 8833438.f1.zip › 8833438.f1/Excel S9.xlsx]

## Sheet: Biological Processes 
Excel S9 Biological Processes Enriched in the m6A-Dependent HNRNPA2B1 Induced Alternative Splicing Isoforms
ID	Description	Adjusted p-value	Gene IDs	Gene Count
GO:0008380	RNA splicing	6.71052e-13	CCAR1/SRSF2/SRSF5/SRSF7/SRSF6/SRSF1/CWC15/ESRP1/THOC2/THOC1/SF3B2/SF3B1/SCAF11/DHX15/SF3A2/SFPQ/RALY/PRPF4B/TIA1/DNAJC8/PABPN1/ZNF326/MPHOSPH10/PRPF3/FUS/HNRNPA1/DAZAP1/ZNF830/PUF60/PCBP2/CDK13/TRA2B/TRA2A/LSM8/CLK1/ZNF638/CLK2/WDR77/LSM5/RPS13/TRPT1/SMN1/RBM3/RBM4/DDX23/RTRAF/HNRNPA2B1/HNRNPL/HNRNPK/METTL3/HNRNPF/HNRNPD/HNRNPC/RBMX/HNRNPH1/CPSF7/HSPA8/TSEN34/ZRANB2/U2AF2/NONO/PCF11/FIP1L1/SRSF11…	85
GO:0006413	translational initiation	7.22517e-12	RPLP0/PPP1CA/EIF2AK1/EIF2AK4/PAIP1/EIF2A/RPL36A/LTO1/ATF4/EIF3B/EIF3G/EIF3H/NPM1/EIF4E/RPL18/RPL17/RPL14/RPL12/RPS18/RPS14/RPS13/RPS24/RPSA/RPS6/RPS7/RPL30/RPL32/RPL31/RPL26/RPL29/RPL23/RPL22/RBM4/RPL7/METTL3/RPL6/RPL9/RPL4/RPL7A/RPS2/RPS3/RPS3A/RPS4X/RPS15A/EIF2B4/COPS5/RPL27A/EIF4E2/EIF4G1/EIF4G2	50
GO:0006403	RNA localization	8.80226e-11	DHX36/PCID2/ATR/SRSF2/SRSF5/SRSF7/SRSF6/SRSF1/CCT6A/THOC2/THOC1/SFPQ/PABPN1/MCM3AP/BICD1/SLBP/CCT2/CCT3/RAN/HNRNPA1/CCT8/NOP58/EIF5A/NPM1/EIF4E/RRS1/ATXN2/ZC3H11A/ZNHIT3/UPF3A/HSF1/NUP205/RUVBL1/XPO1/RTRAF/HNRNPA2B1/XPOT/SMG5/SMG7/CPSF6/U2AF2/NUP35/CHTOP/FIP1L1/SRSF11/ENY2/MEX3D/DDX39B/NUP42/PNPT1/CKAP5/RNPS1/SETD2	53
GO:0006613	cotranslational protein targeting to membrane	9.63991e-11	RPLP0/RPL36A/ARL6IP1/RPL18/RPL17/RPL14/RPL12/RPS18/RPS14/RPS13/RPS24/RPSA/RPS6/RPS7/RPL30/RPL32/RPL31/RPL26/RPL29/RPL23/RPL22/SSR2/RPL7/RPL6/RPL9/RPL4/RPL7A/RPS2/RPS3/RPS3A/RPS4X/RPS15A/SRP54/RPL27A	34
GO:0006405	RNA export from nucleus	2.58694e-08	PCID2/SRSF2/SRSF5/SRSF7/SRSF6/SRSF1/THOC2/THOC1/PABPN1/MCM3AP/SLBP/RAN/HNRNPA1/EIF5A/NPM1/EIF4E/RRS1/ZC3H11A/NUP205/XPO1/HNRNPA2B1/XPOT/SMG5/SMG7/CPSF6/U2AF2/NUP35/CHTOP/FIP1L1/SRSF11/ENY2/DDX39B/NUP42/RNPS1/SETD2	35
GO:0051168	nuclear export	5.45883e-08	PCID2/SRSF2/SRSF5/SRSF7/SRSF6/SRSF1/GTSE1/THOC2/THOC1/STRADB/PABPN1/MCM3AP/SLBP/RAN/CALR/HNRNPA1/EIF5A/NPM1/EIF4E/RRS1/PARK7/ZC3H11A/RANGAP1/NUP205/XPO1/HNRNPA2B1/XPOT/SMG5/SMG7/CPSF6/HSPA9/U2AF2/NUP35/CHTOP/FIP1L1/SRSF11/ENY2/DDX39B/NUP42/CSE1L/RNPS1/TCF7L2/SETD2	43
GO:0016569	covalent chromatin modification	1.31681e-06	OGT/EZH1/EZH2/BRD8/USP21/PPHLN1/SFPQ/MCM3AP/HELLS/EHMT1/MSL3P1/HDAC1/JMJD1C/PAXBP1/BAZ1A/PAXIP1/NAA60/CTBP1/MBD2/GATA2/PPP5C/SREBF1/TET3/PHF8/UBE2E1/PHC1/UBE2A/BRCC3/UBE2B/UBE2N/BRPF3/TADA2A/LEO1/DNMT3B/PHB/NAA40/RUVBL1/ZNF274/MYSM1/DPY30/MTA3/HDAC10/MTA1/TAF7/NSD2/TASOR/KDM5B/CDK1/CDK2/DPF2/KMT2D/KMT2C/KDM4B/MACROH2A1/CHTOP/HUWE1/ENY2/USP7/ACTL6A/MORF4L2/CBX8/TRRAP/WDR5/MSL3/MSL1/MEN1/PCGF3/PCGF…	71
GO:0006417	regulation of translation	2.72378e-06	DHX36/PPP1CA/EIF2AK1/EIF2AK4/PAIP1/EIF2A/RPS27L/TIA1/SAMD4B/MAPKAPK5/ATF4/CALR/PTCD3/EIF5A/EIF3B/EIF3H/NPM1/EIF4E/ATXN2/RPS14/PUS7/FXR1/UPF3A/LSM14B/CNOT11/TRUB2/SHMT2/RPL26/RPL22/RBM3/RBM4/CNOT3/PUM2/PA2G4/CNBP/METTL3/HNRNPD/DPH7/RPS3/RPS4X/NCL/TARBP2/FASTKD3/EIF2B4/TRAP1/MRPL13/ILF3/CAPRIN1/CAPRIN2/MEX3D/DDX39B/EIF4E2/AKT1/AKT2/EIF4G1/EIF4G2/ZNF706	57
GO:0043488	regulation of mRNA stability	4.77547e-06	DHX36/PCID2/PABPC4/PAIP1/SAMD4B/YWHAZ/NPM1/MYEF2/FXR1/XPO1/PUM2/METTL3/HNRNPD/HNRNPC/HSPA8/FASTKD3/FASTKD1/TBRG4/PSMD13/MEX3D/RBM10/PSMA2/PSMA1/PSMA6/PSMA4/PSMA3/PSMB1/PSMC6/PSMC5/AKT1/PSMD4/PSMD6/EIF4G1/PSME3/APEX1	35
GO:0016570	histone modification	8.48903e-06	OGT/EZH1/EZH2/BRD8/USP21/SFPQ/MCM3AP/EHMT1/MSL3P1/HDAC1/JMJD1C/PAXBP1/BAZ1A/PAXIP1/NAA60/CTBP1/GATA2/PPP5C/SREBF1/TET3/PHF8/UBE2E1/PHC1/UBE2A/BRCC3/UBE2B/UBE2N/BRPF3/TADA2A/LEO1/DNMT3B/PHB/NAA40/RUVBL1/ZNF274/MYSM1/DPY30/MTA3/HDAC10/MTA1/TAF7/NSD2/KDM5B/CDK1/CDK2/DPF2/KMT2D/KMT2C/KDM4B/MACROH2A1/CHTOP/HUWE1/ENY2/USP7/ACTL6A/MORF4L2/CBX8/TRRAP/WDR5/MSL3/MSL1/MEN1/PCGF3/PCGF1/ING3/SETD2/SETD5	67
GO:0033044	regulation of chromosome organization	2.86004e-05	CUL3/DHX36/OGT/PCID2/ATR/CCT6A/PPHLN1/SFPQ/TACC3/MAPKAPK5/PAXBP1/CCT2/CCT3/ANAPC5/FBXO5/HNRNPA1/PAXIP1/CCT8/NSMCE2/CTBP1/GATA2/GNL3/SREBF1/PHF8/UBE2B/UBE2N/TLK1/H1-0/TADA2A/DNMT3B/MKI67/SPDL1/NAA40/ZNF274/NUMA1/BUB3/TRIP13/HNRNPA2B1/HNRNPD/HNRNPC/SMG5/TAF7/SMG7/TASOR/MACROH2A1/CHTOP/ATAD2B/USP7/ATAD2/BUB1B/CENPF/PSMG2/SETD5	53
GO:1902749	regulation of cell cycle G2/M phase transition	7.2615e-05	GTSE1/CSNK1D/USP47/TOPBP1/HAUS3/CEP192/DCTN2/FBXO5/PAXIP1/CEP72/NPM1/ZNF830/BRCC3/AKAP9/CEP63/OFD1/RAB11A/MTA3/CDK1/CDK2/ODF2/CDC25A/MACROH2A1/PSMD13/CHMP4C/PSMA2/PSMA1/PSMA6/PSMA4/PSMA3/PSMB1/CKAP5/PSMC6/PSMC5/PSMD4/PSMD6/PSME3/CENPF	38
GO:0007059	chromosome segregation	0.000122009	CUL3/PCID2/ZWINT/KIF4A/RCC1/FANCD2/SFPQ/PRC1/TACC3/RMI1/ANAPC5/RAN/FBXO5/MSTO1/NAA60/FANCM/NSMCE2/CEP85/RRS1/UBE2I/UBE2B/KNSTRN/KIFC1/CDCA8/TLK1/SPAG5/MKI67/EME2/SPDL1/CCNE2/CIAO1/NUMA1/RAB11A/BUB3/TRIP13/PUM2/RPS3/MACROH2A1/CIAO2A/POGZ/TOP3B/CHMP4C/KPNB1/BUB1B/HJURP/CENPF/SUN1/PSMG2	48
GO:0045814	negative regulation of gene expression, epigenetic	0.000124785	EZH1/EZH2/PPHLN1/TRIM27/H4C9/CREBZF/MSL3P1/CHRAC1/CTBP1/H1-0/DNMT3B/HMGB1/TASOR/KMT2D/MACROH2A1/ATAD2B/MORF4L2/ATAD2/MSL3/PCGF1	20
GO:0048285	organelle fission	0.000131316	CUL3/PCID2/ZWINT/KIF4A/RCC1/PPP2R2D/BNIP3/FANCD2/NSFL1C/PRC1/KNTC1/TACC3/RMI1/MYO19/CEP192/ANAPC5/RAN/C11orf80/CALR/FBXO5/MSTO1/FANCM/MTBP/NSMCE2/GOLGA2/TOM1L1/CEP85/RRS1/CDK13/UBE2B/UBE2S/KNSTRN/KIFC1/CDCA8/SPAG5/MTFR1L/MKI67/EME2/SPDL1/CCNE2/HSF1/BCCIP/NUMA1/RAB11A/BUB3/TRIP13/MARCHF5/MACROH2A1/MTFR1/POGZ/PSMD13/CHMP4C/WRAP73/KPNB1/BUB1B/DNM1L/MSH5/CENPF/SUN1/PSMG2	60
GO:0097549	chromatin organization involved in negative regulation of transcription	0.000246127	EZH1/EZH2/PPHLN1/H4C9/HELLS/MSL3P1/HDAC1/CHRAC1/CTBP1/MBD2/PHF8/H1-0/NAA40/HMGB1/TASOR/KMT2D/ATAD2B/MORF4L2/ATAD2/MSL3/PCGF1	21
GO:0006281	DNA repair	0.000263811	LIG3/RAD23B/RAD23A/ATR/FANCD2/SFPQ/USP47/TOPBP1/RMI1/TIMELESS/UBE2V1/H4C9/FUS/PAXIP1/NSMCE4A/FANCL/FANCM/NSMCE2/FANCC/KIN/PPP5C/NPM1/ZNF830/UBE2A/BRCC3/UBE2B/UBE2N/FOXM1/GPS1/RAD51AP1/PARK7/XRCC2/RCHY1/EME2/HSF1/RUVBL1/BCCIP/TCEA1/TRIP13/HDAC10/MTA1/HMGB1/HMGB2/NSD2/RPS3/CDK1/CDK2/NONO/POLK/RFC3/DCLRE1A/RFC4/HUWE1/COPS5/COPS6/USP7/POLR2H/POLR2K/ACTL6A/RBM17/MORF4L2/CBX8/TRRAP/SPIDR/MEN1/MCM7/PCLA…	71
GO:1905508	protein localization to microtubule organizing center	0.000321609	MARK4/NSFL1C/CSNK1D/BICD1/CEP192/DCTN2/CEP72/CEP83/C2CD3/CCDC14/SPAG5/NUMA1	12
GO:0140014	mitotic nuclear division	0.000454022	CUL3/PCID2/ZWINT/KIF4A/RCC1/PPP2R2D/NSFL1C/PRC1/KNTC1/TACC3/CEP192/ANAPC5/RAN/FBXO5/MSTO1/MTBP/NSMCE2/GOLGA2/TOM1L1/CEP85/RRS1/CDK13/UBE2S/KNSTRN/KIFC1/CDCA8/SPAG5/MKI67/SPDL1/BCCIP/NUMA1/RAB11A/BUB3/TRIP13/MACROH2A1/POGZ/CHMP4C/WRAP73/KPNB1/BUB1B/CENPF/PSMG2	42
GO:0000070	mitotic sister chromatid segregation	0.00114138	CUL3/PCID2/ZWINT/KIF4A/PRC1/TACC3/ANAPC5/RAN/FBXO5/MSTO1/NSMCE2/RRS1/KNSTRN/KIFC1/CDCA8/SPAG5/SPDL1/NUMA1/RAB11A/BUB3/TRIP13/MACROH2A1/POGZ/CHMP4C/KPNB1/BUB1B/CENPF/PSMG2	28
GO:0071539	protein localization to centrosome	0.00126304	MARK4/NSFL1C/CSNK1D/BICD1/CEP192/DCTN2/CEP72/CEP83/C2CD3/CCDC14/SPAG5	11
GO:0140053	mitochondrial gene expression	0.00263206	GARS1/MRPL3/MRPL9/PTCD3/TRMT10A/MRPS35/MRPS33/SLC25A33/MRPS15/MRPS28/TWNK/MRPS7/PUS1/TRUB2/SHMT2/TEFM/FASTKD3/MRPL42/MTERF1/MRPL50/TBRG4/MRPL48/MTERF3/MTERF2/MRPL13/MRPL15/MRPL22/PNPT1/MRRF	29
GO:0044839	cell cycle G2/M phase transition	0.00383755	GTSE1/CSNK1D/USP47/TOPBP1/HAUS3/CEP192/DCTN2/FBXO5/PAXIP1/CEP72/NPM1/ZNF830/BRCC3/FOXM1/AKAP9/CEP63/OFD1/RAB11A/MTA3/CDK1/CDK2/ODF2/CDC25A/MACROH2A1/PSMD13/CHMP4C/PSMA2/PSMA1/PSMA6/PSMA4/PSMA3/PSMB1/CKAP5/PSMC6/PSMC5/PSMD4/PSMD6/PSME3/CENPF	39
GO:0007051	spindle organization	0.00490641	KIF4A/RCC1/CSNK1D/PRC1/TACC3/HAUS3/CEP192/RAN/DCTN2/FBXO5/MSTO1/GOLGA2/CEP72/TRIM36/KNSTRN/CEP63/KIFC1/SPAG5/BCCIP/NUMA1/RAB11A/RPS3/DLG1/CHMP4C/CKAP5/WRAP73/KPNB1/SUN2	28
GO:0006839	mitochondrial transport	0.00535893	UBE2J2/MTX2/ARIH2/ACACA/BNIP3/CYC1/ATP5F1C/ATP5F1E/YWHAZ/AGK/SLC25A22/SLC25A33/SLC25A36/SREBF1/SLC25A14/SLC25A10/SLC25A16/PDCD5/MCUR1/ATP5IF1/MPC2/HEBP2/NDUFA13/CPT1B/ATP5MF/MICU2/HSPD1/ATP5MC1/ATP5MC3/HTRA2/HUWE1/PARL/DNAJC19/PMPCB/PNPT1/RHOT1/TIMM44/MOAP1	38
GO:0051983	regulation of chromosome segregation	0.00732569	CUL3/PCID2/SFPQ/TACC3/ANAPC5/FBXO5/NSMCE2/KNSTRN/SPAG5/MKI67/SPDL1/NUMA1/BUB3/TRIP13/PUM2/MACROH2A1/BUB1B/CENPF/PSMG2	19
GO:0000723	telomere maintenance	0.00769167	DHX36/ATR/GAR1/CCT6A/TELO2/MAPKAPK5/LTO1/H4C9/PTGES3/CCT2/CCT3/HNRNPA1/CCT8/NSMCE2/GNL3/CCNE2/HNRNPA2B1/HNRNPD/HNRNPC/SMG5/SMG7/RFC3/DCLRE1A/RFC4/USP7/APEX1	26

## Sheet: Pathways
Excel S9 Pathways Enriched in the m6A-Dependent HNRNPA2B1 Induced Alternative Splicing Isoforms
ID	Description	Adjusted p-value	Gene IDs	Gene Count
hsa03010	Ribosome	1.09268e-10	RPLP0/MRPL3/MRPL9/RPL36A/RPS27L/MRPS15/MRPS7/RPL18/RPL17/RPL14/RPL12/RPS18/RPS14/RPS13/RPS24/RPSA/RPS6/RPS7/RPL30/RPL32/RPL31/RPL26/RPL29/RPL23/RPL22/RPL7/RPL6/RPL9/RPL4/RPL7A/RPS2/RPS3/RPS3A/RPS4X/RPS15A/RPL27A/MRPL13/MRPL15/MRPL22	39
hsa03040	Spliceosome	7.32241e-07	SRSF2/SRSF5/SRSF7/SRSF6/SRSF1/CWC15/THOC2/THOC1/SF3B2/SF3B1/DHX15/SF3A2/PRPF3/HNRNPA1/CCDC12/PUF60/TRA2B/TRA2A/LSM8/LSM5/DDX23/TCERG1/HNRNPK/HNRNPC/RBMX/HSPA8/U2AF2/SNRNP27/PRPF38B/RBM25/RBM17/ACIN1/DDX39B	33
hsa03013	RNA transport	0.00020738	PABPC4/PABPC3/PAIP1/THOC2/THOC1/TACC3/RAN/EIF3B/EIF3G/EIF3H/EIF4E/UBE2I/RANGAP1/FXR1/UPF3A/SMN1/NUP205/XPO1/XPOT/NUP35/EIF2B4/PNN/ACIN1/DDX39B/NUPL2/SAP18/RNPS1/EIF4E2/KPNB1/EIF4G1/EIF4G2	31
hsa03015	mRNA surveillance pathway	0.000230868	PPP1CA/PPP2R5E/PABPC4/PABPC3/PPP2R2D/PABPN1/DAZAP1/UPF3A/SMG5/SMG7/CPSF7/CPSF6/PCF11/FIP1L1/PNN/ACIN1/DDX39B/CSTF3/SAP18/RNPS1/MSI1	21
hsa03050	Proteasome	0.00501707	PSMD13/PSMA2/PSMA1/PSMA6/PSMA4/PSMA3/PSMB1/PSMC6/PSMC5/PSMD4/PSMD6/PSME3	12
R-HSA-72766	Translation	1.1931e-11	RPLP0/GARS1/MRPL3/MRPL9/EEF1D/MARS2/RPL36A/RPS27L/APEH/IARS1/PTCD3/EEF1E1/MRPS35/MRPS33/MRPS15/EIF3B/EIF3G/EIF3H/MRPS28/EIF4E/SPCS1/MRPS7/TARS1/RPL18/RPL17/RPL14/RPL12/RPS18/RPS14/RPS13/RPS24/RPSA/RPS6/RPS7/RPL30/RPL32/RPL31/RPL26/RPL29/RPL23/RPL22/SSR2/RPL7/RPL6/RPL9/RPL4/RPL7A/RPS2/RPS3/RPS3A/NARS2/RPS4X/RPS15A/MRPL42/EIF2B4/MRPL50/MRPL48/SRP54/NARS1/RPL27A/MRPL13/MRPL15/MRPL22/MRRF/EIF4G1/LARS1	66
R-HSA-72706	GTP hydrolysis and joining of the 60S ribosomal subunit	1.30573e-11	RPLP0/RPL36A/RPS27L/EIF3B/EIF3G/EIF3H/EIF4E/RPL18/RPL17/RPL14/RPL12/RPS18/RPS14/RPS13/RPS24/RPSA/RPS6/RPS7/RPL30/RPL32/RPL31/RPL26/RPL29/RPL23/RPL22/RPL7/RPL6/RPL9/RPL4/RPL7A/RPS2/RPS3/RPS3A/RPS4X/RPS15A/RPL27A/EIF4G1	37
R-HSA-72689	Formation of a pool of free 40S subunits	1.30573e-11	RPLP0/RPL36A/RPS27L/EIF3B/EIF3G/EIF3H/RPL18/RPL17/RPL14/RPL12/RPS18/RPS14/RPS13/RPS24/RPSA/RPS6/RPS7/RPL30/RPL32/RPL31/RPL26/RPL29/RPL23/RPL22/RPL7/RPL6/RPL9/RPL4/RPL7A/RPS2/RPS3/RPS3A/RPS4X/RPS15A/RPL27A	35
R-HSA-72613	Eukaryotic Translation Initiation	1.30573e-11	RPLP0/RPL36A/RPS27L/EIF3B/EIF3G/EIF3H/EIF4E/RPL18/RPL17/RPL14/RPL12/RPS18/RPS14/RPS13/RPS24/RPSA/RPS6/RPS7/RPL30/RPL32/RPL31/RPL26/RPL29/RPL23/RPL22/RPL7/RPL6/RPL9/RPL4/RPL7A/RPS2/RPS3/RPS3A/RPS4X/RPS15A/EIF2B4/RPL27A/EIF4G1	38
R-HSA-72737	Cap-dependent Translation Initiation	1.30573e-11	RPLP0/RPL36A/RPS27L/EIF3B/EIF3G/EIF3H/EIF4E/RPL18/RPL17/RPL14/RPL12/RPS18/RPS14/RPS13/RPS24/RPSA/RPS6/RPS7/RPL30/RPL32/RPL31/RPL26/RPL29/RPL23/RPL22/RPL7/RPL6/RPL9/RPL4/RPL7A/RPS2/RPS3/RPS3A/RPS4X/RPS15A/EIF2B4/RPL27A/EIF4G1	38
R-HSA-927802	Nonsense-Mediated Decay (NMD)	1.59232e-11	RPLP0/RPL36A/RPS27L/RPL18/RPL17/RPL14/RPL12/RPS18/RPS14/RPS13/RPS24/RPSA/RPS6/RPS7/UPF3A/RPL30/RPL32/RPL31/RPL26/RPL29/RPL23/RPL22/RPL7/RPL6/RPL9/RPL4/RPL7A/SMG5/SMG7/RPS2/RPS3/RPS3A/RPS4X/RPS15A/RPL27A/RNPS1/EIF4G1	37
R-HSA-975957	Nonsense Mediated Decay (NMD) enhanced by the Exon Junction Complex (EJC)	1.59232e-11	RPLP0/RPL36A/RPS27L/RPL18/RPL17/RPL14/RPL12/RPS18/RPS14/RPS13/RPS24/RPSA/RPS6/RPS7/UPF3A/RPL30/RPL32/RPL31/RPL26/RPL29/RPL23/RPL22/RPL7/RPL6/RPL9/RPL4/RPL7A/SMG5/SMG7/RPS2/RPS3/RPS3A/RPS4X/RPS15A/RPL27A/RNPS1/EIF4G1	37
R-HSA-156842	Eukaryotic Translation Elongation	1.59232e-11	RPLP0/EEF1D/RPL36A/RPS27L/RPL18/RPL17/RPL14/RPL12/RPS18/RPS14/RPS13/RPS24/RPSA/RPS6/RPS7/RPL30/RPL32/RPL31/RPL26/RPL29/RPL23/RPL22/RPL7/RPL6/RPL9/RPL4/RPL7A/RPS2/RPS3/RPS3A/RPS4X/RPS15A/RPL27A	33
R-HSA-72764	Eukaryotic Translation Termination	1.59232e-11	RPLP0/RPL36A/RPS27L/APEH/RPL18/RPL17/RPL14/RPL12/RPS18/RPS14/RPS13/RPS24/RPSA/RPS6/RPS7/RPL30/RPL32/RPL31/RPL26/RPL29/RPL23/RPL22/RPL7/RPL6/RPL9/RPL4/RPL7A/RPS2/RPS3/RPS3A/RPS4X/RPS15A/RPL27A	33
R-HSA-975956	Nonsense Mediated Decay (NMD) independent of the Exon Junction Complex (EJC)	1.97767e-11	RPLP0/RPL36A/RPS27L/RPL18/RPL17/RPL14/RPL12/RPS18/RPS14/RPS13/RPS24/RPSA/RPS6/RPS7/RPL30/RPL32/RPL31/RPL26/RPL29/RPL23/RPL22/RPL7/RPL6/RPL9/RPL4/RPL7A/RPS2/RPS3/RPS3A/RPS4X/RPS15A/RPL27A/EIF4G1	33
R-HSA-1799339	SRP-dependent cotranslational protein targeting to membrane	1.79945e-10	RPLP0/RPL36A/RPS27L/SPCS1/RPL18/RPL17/RPL14/RPL12/RPS18/RPS14/RPS13/RPS24/RPSA/RPS6/RPS7/RPL30/RPL32/RPL31/RPL26/RPL29/RPL23/RPL22/SSR2/RPL7/RPL6/RPL9/RPL4/RPL7A/RPS2/RPS3/RPS3A/RPS4X/RPS15A/SRP54/RPL27A	35
R-HSA-72203	Processing of Capped Intron-Containing Pre-mRNA	3.2038e-09	CCAR1/SRSF2/SRSF5/SRSF7/SRSF6/SRSF1/CWC15/THOC2/THOC1/SF3B2/SF3B1/DHX15/SF3A2/DNAJC8/PABPN1/PRPF3/SLBP/FUS/HNRNPA1/EIF4E/PUF60/PCBP2/TRA2B/ZC3H11A/LSM8/LSM5/NUP205/DDX23/HNRNPA2B1/HNRNPL/HNRNPK/METTL3/HNRNPF/HNRNPD/HNRNPC/RBMX/HNRNPH1/CPSF7/HSPA8/U2AF2/NUP35/CHTOP/PCF11/FIP1L1/SRSF11/SNRNP27/POLR2H/POLR2K/RBM17/DDX39B/NUP42/CSTF3/RNPS1	53
R-HSA-8868773	rRNA processing in the nucleus and cytosol	1.7708e-08	RPLP0/GAR1/CSNK1D/RPL36A/RPS27L/MPHOSPH10/NOP58/GNL3/UTP6/RPL18/RPL17/RPL14/WDR75/RPL12/RPS18/RPS14/RPS13/RPS24/RPSA/RPS6/RPS7/RPL30/RPL32/RPL31/RPL26/RPL29/RPL23/RPL22/RPL7/DDX49/RPL6/RPL9/RPL4/RPL7A/RPS2/RPS3/DCAF13/RPS3A/RPS4X/NCL/RPS15A/NOP2/RPL27A/RBM28	44
R-HSA-6791226	Major pathway of rRNA processing in the nucleolus and cytosol	3.77247e-08	RPLP0/CSNK1D/RPL36A/RPS27L/MPHOSPH10/NOP58/GNL3/UTP6/RPL18/RPL17/RPL14/WDR75/RPL12/RPS18/RPS14/RPS13/RPS24/RPSA/RPS6/RPS7/RPL30/RPL32/RPL31/RPL26/RPL29/RPL23/RPL22/RPL7/DDX49/RPL6/RPL9/RPL4/RPL7A/RPS2/RPS3/DCAF13/RPS3A/RPS4X/NCL/RPS15A/RPL27A/RBM28	42
R-HSA-72163	mRNA Splicing - Major Pathway	5.27946e-08	CCAR1/SRSF2/SRSF5/SRSF7/SRSF6/SRSF1/CWC15/SF3B2/SF3B1/DHX15/SF3A2/DNAJC8/PABPN1/PRPF3/FUS/HNRNPA1/PUF60/PCBP2/TRA2B/LSM8/LSM5/DDX23/HNRNPA2B1/HNRNPL/HNRNPK/HNRNPF/HNRNPD/HNRNPC/RBMX/HNRNPH1/CPSF7/HSPA8/U2AF2/PCF11/FIP1L1/SRSF11/SNRNP27/POLR2H/POLR2K/RBM17/CSTF3/RNPS1	42
R-HSA-72312	rRNA processing	9.5258e-08	RPLP0/GAR1/CSNK1D/RPL36A/RPS27L/MPHOSPH10/NOP58/GNL3/UTP6/RPL18/RPL17/RPL14/WDR75/RPL12/RPS18/RPS14/RPS13/RPS24/RPSA/RPS6/RPS7/RPL30/RPL32/RPL31/RPL26/RPL29/RPL23/RPL22/RPL7/DDX49/RPL6/RPL9/RPL4/RPL7A/RPS2/RPS3/DCAF13/RPS3A/RPS4X/NCL/RPS15A/NOP2/RPL27A/RBM28	44
R-HSA-72172	mRNA Splicing	2.05305e-07	CCAR1/SRSF2/SRSF5/SRSF7/SRSF6/SRSF1/CWC15/SF3B2/SF3B1/DHX15/SF3A2/DNAJC8/PABPN1/PRPF3/FUS/HNRNPA1/PUF60/PCBP2/TRA2B/LSM8/LSM5/DDX23/HNRNPA2B1/HNRNPL/HNRNPK/HNRNPF/HNRNPD/HNRNPC/RBMX/HNRNPH1/CPSF7/HSPA8/U2AF2/PCF11/FIP1L1/SRSF11/SNRNP27/POLR2H/POLR2K/RBM17/CSTF3/RNPS1	42
R-HSA-72649	Translation initiation complex formation	1.82737e-05	RPS27L/EIF3B/EIF3G/EIF3H/EIF4E/RPS18/RPS14/RPS13/RPS24/RPSA/RPS6/RPS7/RPS2/RPS3/RPS3A/RPS4X/RPS15A/EIF4G1	18
R-HSA-72662	Activation of the mRNA upon binding of the cap-binding complex and eIFs, and subsequent binding to 43S	2.32443e-05	RPS27L/EIF3B/EIF3G/EIF3H/EIF4E/RPS18/RPS14/RPS13/RPS24/RPSA/RPS6/RPS7/RPS2/RPS3/RPS3A/RPS4X/RPS15A/EIF4G1	18
R-HSA-72702	Ribosomal scanning and start codon recognition	2.32443e-05	RPS27L/EIF3B/EIF3G/EIF3H/EIF4E/RPS18/RPS14/RPS13/RPS24/RPSA/RPS6/RPS7/RPS2/RPS3/RPS3A/RPS4X/RPS15A/EIF4G1	18
R-HSA-69481	G2/M Checkpoints	4.11305e-05	ATR/GTSE1/DBF4/TOPBP1/RMI1/H4C9/YWHAZ/BRCC3/UBE2N/H2BC15/H2BC13/NSD2/CDK1/CDK2/CDC25A/RFC3/RFC4/PSMD13/ORC6/ORC2/PSMA2/PSMA1/PSMA6/PSMA4/PSMA3/PSMB1/PSMC6/PSMC5/MCM7/PSMD4/PSMD6/PSME3	32
R-HSA-73856	RNA Polymerase II Transcription Termination	4.2577e-05	SRSF2/SRSF5/SRSF7/SRSF6/SRSF1/THOC2/THOC1/PABPN1/SLBP/ZC3H11A/CPSF7/U2AF2/CHTOP/PCF11/FIP1L1/SRSF11/DDX39B/CSTF3/RNPS1	19
R-HSA-69620	Cell Cycle Checkpoints	4.78918e-05	ZWINT/PPP2R5E/ATR/GTSE1/DBF4/KNTC1/TOPBP1/RMI1/H4C9/ANAPC5/YWHAZ/UBE2E1/BRCC3/UBE2N/RANGAP1/CDCA8/H2BC15/H2BC13/SPDL1/CCNE2/BUB3/XPO1/NSD2/CDK1/CDK2/CDC25A/RFC3/RFC4/PSMD13/ORC6/ORC2/PSMA2/PSMA1/PSMA6/PSMA4/PSMA3/ANAPC10/PSMB1/CKAP5/PSMC6/PSMC5/MCM7/PSMD4/PSMD6/BUB1B/PSME3/CENPF/CENPU	48
R-HSA-72695	Formation of the ternary complex, and subsequently, the 43S complex	9.17861e-05	RPS27L/EIF3B/EIF3G/EIF3H/RPS18/RPS14/RPS13/RPS24/RPSA/RPS6/RPS7/RPS2/RPS3/RPS3A/RPS4X/RPS15A	16
R-HSA-176408	Regulation of APC/C activators between G1/S and early anaphase	0.000132189	ANAPC5/FBXO5/UBE2E1/BUB3/CDK1/CDK2/PSMD13/PSMA2/PSMA1/PSMA6/PSMA4/PSMA3/ANAPC10/PSMB1/PSMC6/PSMC5/PSMD4/PSMD6/BUB1B/PSME3	20
R-HSA-174184	Cdc20:Phospho-APC/C mediated degradation of Cyclin A	0.000342375	ANAPC5/UBE2E1/BUB3/CDK1/PSMD13/PSMA2/PSMA1/PSMA6/PSMA4/PSMA3/ANAPC10/PSMB1/PSMC6/PSMC5/PSMD4/PSMD6/BUB1B/PSME3	18
R-HSA-179419	APC:Cdc20 mediated degradation of cell cycle proteins prior to satisfation of the cell cycle checkpoint	0.000417254	ANAPC5/UBE2E1/BUB3/CDK1/PSMD13/PSMA2/PSMA1/PSMA6/PSMA4/PSMA3/ANAPC10/PSMB1/PSMC6/PSMC5/PSMD4/PSMD6/BUB1B/PSME3	18
R-HSA-174143	APC/C-mediated degradation of cell cycle proteins	0.000420444	ANAPC5/FBXO5/UBE2E1/BUB3/CDK1/CDK2/PSMD13/PSMA2/PSMA1/PSMA6/PSMA4/PSMA3/ANAPC10/PSMB1/PSMC6/PSMC5/PSMD4/PSMD6/BUB1B/PSME3	20
R-HSA-453276	Regulation of mitotic cell cycle	0.000420444	ANAPC5/FBXO5/UBE2E1/BUB3/CDK1/CDK2/PSMD13/PSMA2/PSMA1/PSMA6/PSMA4/PSMA3/ANAPC10/PSMB1/PSMC6/PSMC5/PSMD4/PSMD6/BUB1B/PSME3	20
R-HSA-450408	AUF1 (hnRNP D0) binds and destabilizes mRNA	0.000504947	HNRNPD/HSPA8/PSMD13/PSMA2/PSMA1/PSMA6/PSMA4/PSMA3/PSMB1/PSMC6/PSMC5/PSMD4/PSMD6/EIF4G1/PSME3	15
R-HSA-176409	APC/C:Cdc20 mediated degradation of mitotic proteins	0.000583611	ANAPC5/UBE2E1/BUB3/CDK1/PSMD13/PSMA2/PSMA1/PSMA6/PSMA4/PSMA3/ANAPC10/PSMB1/PSMC6/PSMC5/PSMD4/PSMD6/BUB1B/PSME3	18
R-HSA-176814	Activation of APC/C and APC/C:Cdc20 mediated degradation of mitotic proteins	0.000687367	ANAPC5/UBE2E1/BUB3/CDK1/PSMD13/PSMA2/PSMA1/PSMA6/PSMA4/PSMA3/ANAPC10/PSMB1/PSMC6/PSMC5/PSMD4/PSMD6/BUB1B/PSME3	18
R-HSA-69052	Switching of origins to a post-replicative state	0.000800939	ANAPC5/UBE2E1/CCNE2/CDK2/PSMD13/ORC6/ORC2/PSMA2/PSMA1/PSMA6/PSMA4/PSMA3/ANAPC10/PSMB1/PSMC6/PSMC5/MCM7/PSMD4/PSMD6/PSME3	20
R-HSA-72202	Transport of Mature Transcript to Cytoplasm	0.0008847	SRSF2/SRSF5/SRSF7/SRSF6/SRSF1/THOC2/THOC1/SLBP/EIF4E/ZC3H11A/NUP205/U2AF2/NUP35/CHTOP/FIP1L1/SRSF11/DDX39B/NUP42/RNPS1	19
R-HSA-69017	CDK-mediated phosphorylation and removal of Cdc6	0.0010567	ANAPC5/UBE2E1/CCNE2/CDK2/PSMD13/PSMA2/PSMA1/PSMA6/PSMA4/PSMA3/ANAPC10/PSMB1/PSMC6/PSMC5/PSMD4/PSMD6/PSME3	17
R-HSA-73894	DNA Repair	0.00161224	LIG3/RAD23B/RAD23A/ATR/FANCD2/BPHL/TOPBP1/RMI1/TIMELESS/H4C9/PAXIP1/FANCL/FANCM/FANCC/PPP5C/ZNF830/BRCC3/UBE2I/UBE2B/UBE2N/GPS1/RAD51AP1/XRCC2/H2BC15/H2BC13/RCHY1/EME2/RUVBL1/TCEA1/NSD2/CDK2/KDM4B/H2AZ2/POLK/RFC3/DCLRE1A/RFC4/COPS5/COPS6/USP7/POLR2H/POLR2K/ACTL6A/SPIDR/PCLAF/APEX1/MSH6	47
R-HSA-6807070	PTEN Regulation	0.00167572	EZH2/TRIM27/HDAC1/MKRN1/SCMH1/PHC1/MTA3/MTA1/RHEB/USP7/PSMD13/CBX4/CBX8/PSMA2/PSMA1/PSMA6/PSMA4/PSMA3/PSMB1/PSMC6/PSMC5/AKT1/PSMD4/PSMD6/AKT2/PSME3	26
R-HSA-69206	G1/S Transition	0.001994	DBF4/HDAC1/E2F5/FBXO5/CCNE2/CDK1/CDK2/CDC25A/PSMD13/ORC6/ORC2/PSMA2/PSMA1/PSMA6/PSMA4/PSMA3/PSMB1/PSMC6/PSMC5/AKT1/MCM7/PSMD4/PSMD6/AKT2/PSME3	25
R-HSA-8948751	Regulation of PTEN stability and activity	0.00239557	TRIM27/MKRN1/PSMD13/PSMA2/PSMA1/PSMA6/PSMA4/PSMA3/PSMB1/PSMC6/PSMC5/AKT1/PSMD4/PSMD6/AKT2/PSME3	16
R-HSA-3247509	Chromatin modifying enzymes	0.00264629	OGT/EZH2/BRD8/RELA/SMARCA4/H4C9/EHMT1/HDAC1/PHF8/H2BC15/BRPF3/H2BC13/WDR77/TADA2A/RUVBL1/DPY30/MTA3/HDAC10/MTA1/SMARCE1/NSD2/RPS2/KDM5B/KMT2D/KMT2C/KDM4B/H2AZ2/ENY2/ACTL6A/MORF4L2/SUPT20H/TRRAP/WDR5/SAP18/MSL3/MSL1/ING3/SETD2	38
R-HSA-4839726	Chromatin organization	0.00264629	OGT/EZH2/BRD8/RELA/SMARCA4/H4C9/EHMT1/HDAC1/PHF8/H2BC15/BRPF3/H2BC13/WDR77/TADA2A/RUVBL1/DPY30/MTA3/HDAC10/MTA1/SMARCE1/NSD2/RPS2/KDM5B/KMT2D/KMT2C/KDM4B/H2AZ2/ENY2/ACTL6A/MORF4L2/SUPT20H/TRRAP/WDR5/SAP18/MSL3/MSL1/ING3/SETD2	38
R-HSA-68949	Orc1 removal from chromatin	0.00266787	CDK2/PSMD13/ORC6/ORC2/PSMA2/PSMA1/PSMA6/PSMA4/PSMA3/PSMB1/PSMC6/PSMC5/MCM7/PSMD4/PSMD6/PSME3	16
R-HSA-69202	Cyclin E associated events during G1/S transition	0.00277789	E2F5/CCNE2/CDK2/CDC25A/PSMD13/PSMA2/PSMA1/PSMA6/PSMA4/PSMA3/PSMB1/PSMC6/PSMC5/AKT1/PSMD4/PSMD6/AKT2/PSME3	18
R-HSA-69601	Ubiquitin Mediated Degradation of Phosphorylated Cdc25A	0.00305254	CDC25A/PSMD13/PSMA2/PSMA1/PSMA6/PSMA4/PSMA3/PSMB1/PSMC6/PSMC5/PSMD4/PSMD6/PSME3	13
R-HSA-69610	p53-Independent DNA Damage Response	0.00305254	CDC25A/PSMD13/PSMA2/PSMA1/PSMA6/PSMA4/PSMA3/PSMB1/PSMC6/PSMC5/PSMD4/PSMD6/PSME3	13
R-HSA-69613	p53-Independent G1/S DNA damage checkpoint	0.00305254	CDC25A/PSMD13/PSMA2/PSMA1/PSMA6/PSMA4/PSMA3/PSMB1/PSMC6/PSMC5/PSMD4/PSMD6/PSME3	13
R-HSA-450531	Regulation of mRNA stability by proteins that bind AU-rich elements	0.00308163	YWHAZ/XPO1/HNRNPD/HSPA8/PSMD13/PSMA2/PSMA1/PSMA6/PSMA4/PSMA3/PSMB1/PSMC6/PSMC5/AKT1/PSMD4/PSMD6/EIF4G1/PSME3	18
R-HSA-174084	Autodegradation of Cdh1 by Cdh1:APC/C	0.00315747	ANAPC5/UBE2E1/PSMD13/PSMA2/PSMA1/PSMA6/PSMA4/PSMA3/ANAPC10/PSMB1/PSMC6/PSMC5/PSMD4/PSMD6/PSME3	15
R-HSA-68886	M Phase	0.00332721	ZWINT/PPP2R5E/NCAPG2/PPP2R2D/CSNK1D/KNTC1/H4C9/HAUS3/CEP192/RAB1A/ANAPC5/DCTN2/FBXO5/GOLGA2/CEP72/PHF8/UBE2E1/AKAP9/CEP63/RANGAP1/CDCA8/H2BC15/H2BC13/SPDL1/OFD1/NUP205/NUMA1/BUB3/XPO1/CDK1/ODF2/H2AZ2/NUP35/PSMD13/NUP42/PSMA2/PSMA1/PSMA6/PSMA4/PSMA3/ANAPC10/PSMB1/CKAP5/PSMC6/PSMC5/PSMD4/PSMD6/BUB1B/PSME3/CENPF/CENPU	51
R-HSA-68827	CDT1 association with the CDC6:ORC:origin complex	0.00336408	PSMD13/ORC6/ORC2/PSMA2/PSMA1/PSMA6/PSMA4/PSMA3/PSMB1/PSMC6/PSMC5/PSMD4/PSMD6/PSME3	14
R-HSA-69656	Cyclin A:Cdk2-associated events at S phase entry	0.00341977	E2F5/CCNE2/CDK2/CDC25A/PSMD13/PSMA2/PSMA1/PSMA6/PSMA4/PSMA3/PSMB1/PSMC6/PSMC5/AKT1/PSMD4/PSMD6/AKT2/PSME3	18
R-HSA-69278	Cell Cycle, Mitotic	0.00403106	ZWINT/PPP2R5E/NCAPG2/PPP2R2D/GTSE1/CSNK1D/DBF4/KNTC1/H4C9/HDAC1/E2F5/HAUS3/CEP192/RAB1A/ANAPC5/DCTN2/FBXO5/GOLGA2/CEP72/PHF8/UBE2E1/FOXM1/AKAP9/CEP63/RANGAP1/CDCA8/H2BC15/H2BC13/SPDL1/CCNE2/OFD1/NUP205/NUMA1/BUB3/XPO1/CDK1/CDK2/ODF2/CDC25A/H2AZ2/NUP35/RFC3/RFC4/PSMD13/ORC6/ORC2/NUP42/PSMA2/PSMA1/PSMA6/PSMA4/PSMA3/ANAPC10/PSMB1/CKAP5/PSMC6/PSMC5/AKT1/MCM7/PSMD4/PSMD6/AKT2/BUB1B/PSME3/CENPF/CENPU	66
R-HSA-174154	APC/C:Cdc20 mediated degradation of Securin	0.00407267	ANAPC5/UBE2E1/PSMD13/PSMA2/PSMA1/PSMA6/PSMA4/PSMA3/ANAPC10/PSMB1/PSMC6/PSMC5/PSMD4/PSMD6/PSME3	15
R-HSA-69615	G1/S DNA Damage Checkpoints	0.00407267	CCNE2/CDK2/CDC25A/PSMD13/PSMA2/PSMA1/PSMA6/PSMA4/PSMA3/PSMB1/PSMC6/PSMC5/PSMD4/PSMD6/PSME3	15
R-HSA-69306	DNA Replication	0.004389	DBF4/ANAPC5/UBE2E1/CCNE2/CDK2/RFC3/RFC4/PSMD13/ORC6/ORC2/PSMA2/PSMA1/PSMA6/PSMA4/PSMA3/ANAPC10/PSMB1/PSMC6/PSMC5/MCM7/PSMD4/PSMD6/PSME3	23
R-HSA-69239	Synthesis of DNA	0.00459602	ANAPC5/UBE2E1/CCNE2/CDK2/RFC3/RFC4/PSMD13/ORC6/ORC2/PSMA2/PSMA1/PSMA6/PSMA4/PSMA3/ANAPC10/PSMB1/PSMC6/PSMC5/MCM7/PSMD4/PSMD6/PSME3	22
R-HSA-68867	Assembly of the pre-replicative complex	0.00463319	PSMD13/ORC6/ORC2/PSMA2/PSMA1/PSMA6/PSMA4/PSMA3/PSMB1/PSMC6/PSMC5/MCM7/PSMD4/PSMD6/PSME3	15
R-HSA-159236	Transport of Mature mRNA derived from an Intron-Containing Transcript	0.00463319	SRSF2/SRSF5/SRSF7/SRSF6/SRSF1/THOC2/THOC1/ZC3H11A/NUP205/U2AF2/NUP35/CHTOP/SRSF11/DDX39B/NUP42/RNPS1	16
R-HSA-69002	DNA Replication Pre-Initiation	0.0060949	DBF4/CDK2/PSMD13/ORC6/ORC2/PSMA2/PSMA1/PSMA6/PSMA4/PSMA3/PSMB1/PSMC6/PSMC5/MCM7/PSMD4/PSMD6/PSME3	17
R-HSA-69563	p53-Dependent G1 DNA Damage Response	0.00790646	CCNE2/CDK2/PSMD13/PSMA2/PSMA1/PSMA6/PSMA4/PSMA3/PSMB1/PSMC6/PSMC5/PSMD4/PSMD6/PSME3	14
R-HSA-69580	p53-Dependent G1/S DNA damage checkpoint	0.00790646	CCNE2/CDK2/PSMD13/PSMA2/PSMA1/PSMA6/PSMA4/PSMA3/PSMB1/PSMC6/PSMC5/PSMD4/PSMD6/PSME3	14
R-HSA-174178	APC/C:Cdh1 mediated degradation of Cdc20 and other APC/C:Cdh1 targeted proteins in late mitosis/early G1	0.00795841	ANAPC5/UBE2E1/PSMD13/PSMA2/PSMA1/PSMA6/PSMA4/PSMA3/ANAPC10/PSMB1/PSMC6/PSMC5/PSMD4/PSMD6/PSME3	15
R-HSA-349425	Autodegradation of the E3 ubiquitin ligase COP1	0.00802296	PSMD13/PSMA2/PSMA1/PSMA6/PSMA4/PSMA3/PSMB1/PSMC6/PSMC5/PSMD4/PSMD6/PSME3	12
R-HSA-75815	Ubiquitin-dependent degradation of Cyclin D	0.00802296	PSMD13/PSMA2/PSMA1/PSMA6/PSMA4/PSMA3/PSMB1/PSMC6/PSMC5/PSMD4/PSMD6/PSME3	12
R-HSA-453279	Mitotic G1-G1/S phases	0.00872408	DBF4/HDAC1/E2F5/FBXO5/CCNE2/CDK1/CDK2/CDC25A/PSMD13/ORC6/ORC2/PSMA2/PSMA1/PSMA6/PSMA4/PSMA3/PSMB1/PSMC6/PSMC5/AKT1/MCM7/PSMD4/PSMD6/AKT2/PSME3	25
R-HSA-169911	Regulation of Apoptosis	0.00929977	PSMD13/PSMA2/PSMA1/PSMA6/PSMA4/PSMA3/PSMB1/PSMC6/PSMC5/PSMD4/PSMD6/PSME3	12
