# Supplementary figures and images for: Systematic Investigation of mRNA N6-Methyladenosine Machinery in Primary Prostate Cancer
Source: Hindawi journal article supplement (doi:10.1155/2020/8833438), 2020-11-12

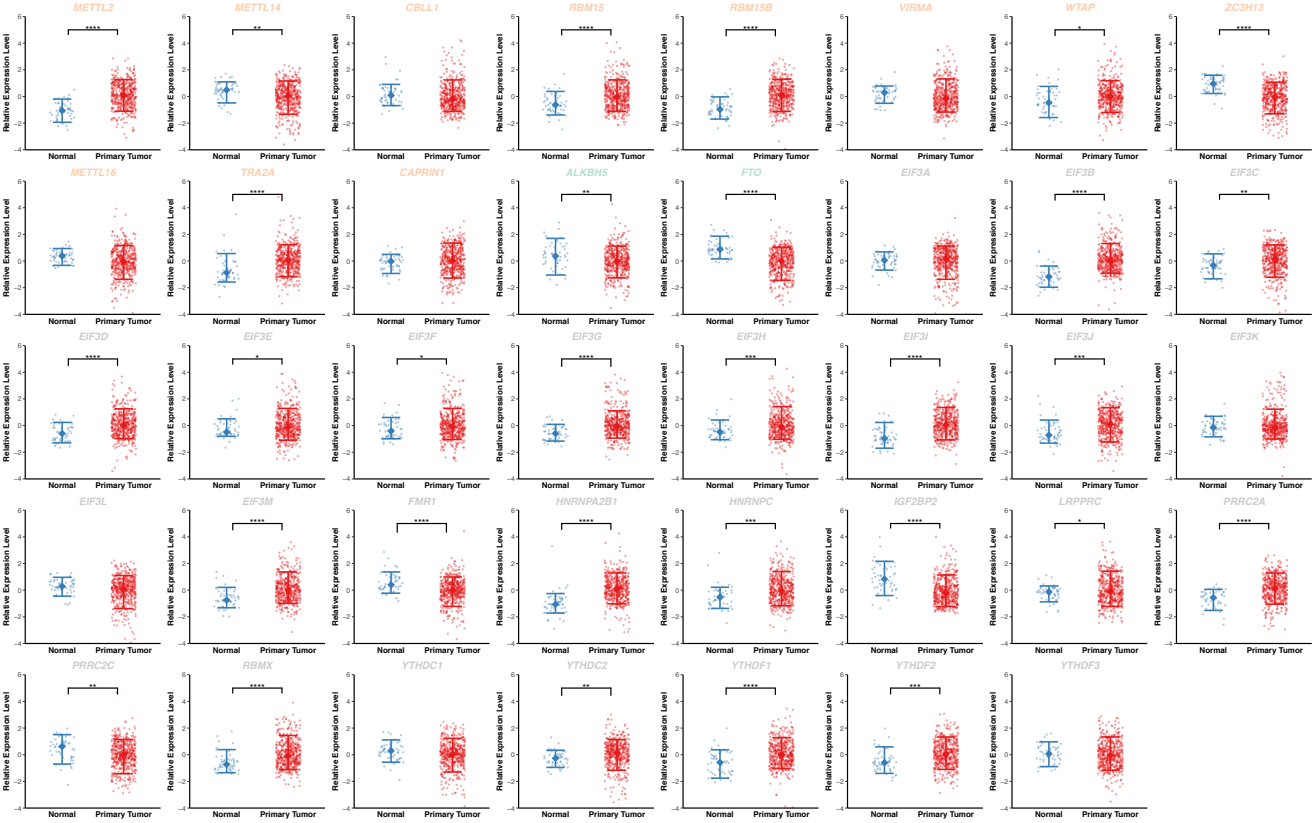

Supplement: f1 [file 8833438.f1.zip]

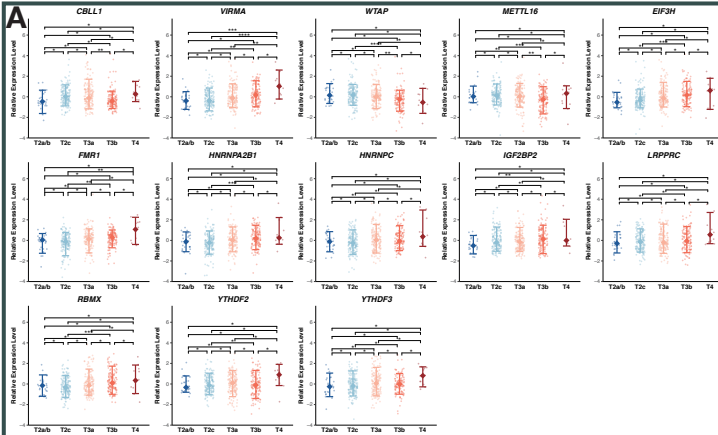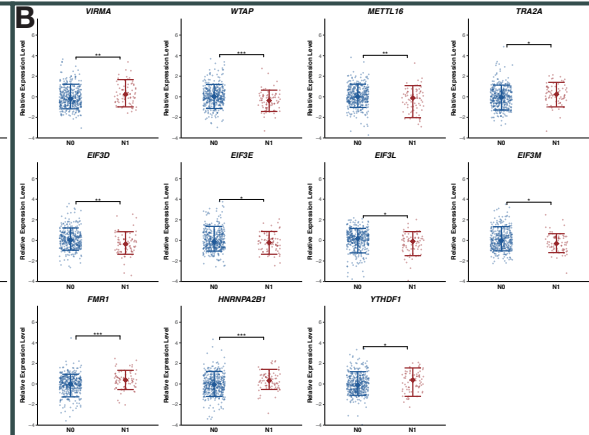

Supplement: f1 [file 8833438.f1.zip]

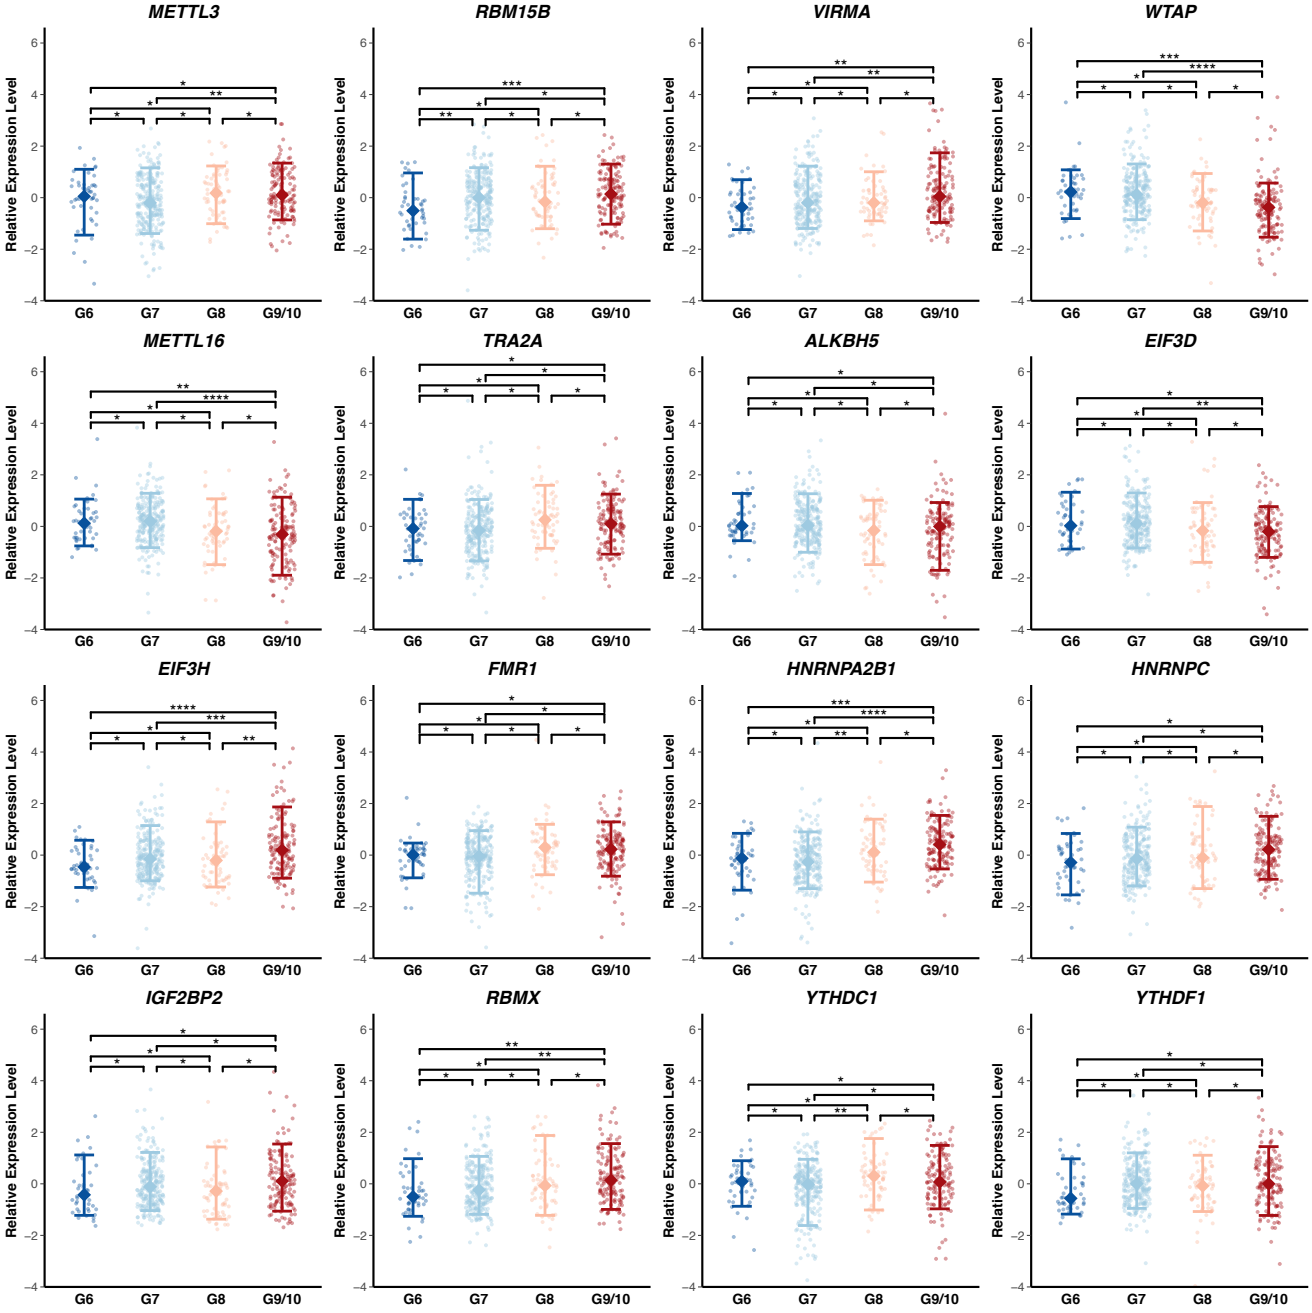

Supplement: f1 [file 8833438.f1.zip]
